# Supplementary material for: Covalent Occlusion of the RORγt Ligand Binding Pocket Allows Unambiguous Targeting of an Allosteric Site
Source: PubMed Central journal article supplement — ACS Med Chem Lett. 2021 Mar 8;12(4):631–9. doi: 10.1021/acsmedchemlett.1c00029 (PMC8040040; doi:10.1021/acsmedchemlett.1c00029), 2021-03-08
Supplement: ml1c00029_si_001.pdf [file ml1c00029_si_001.pdf]

# Supporting Information

# Covalent Occlusion of the ROR $\gamma$ t Ligand Binding Pocket Allows Unambiguous Targeting of an Allosteric Site

*Femke A. Meijer,<sup>‡,§</sup> Maxime C.M. van den Oetelaar,<sup>‡,§</sup> Richard G. Doveston,<sup>‡,§</sup> Ella N.R. Sampers<sup>‡</sup> and Luc Brunsveld<sup>‡,\*</sup>*

<sup>‡</sup> These authors contributed equally to this work.

## AUTHOR ADDRESS

<sup>‡</sup> Laboratory of Chemical Biology, Department of Biomedical Engineering and Institute for Complex Molecular Systems, Technische Universiteit Eindhoven, Den Dolech 2, 5612 AZ Eindhoven, The Netherlands

<sup>§</sup> Leicester Institute of Structural and Chemical Biology and School of Chemistry, University of Leicester, University Road, Leicester, UK, LE1 7RH.

\* Corresponding author: l.brunsveld@tue.nl

## CONTENTS

### **S1.0. Experimental section**

#### **S1.1. *In silico* measurements**

#### **S1.2. General chemistry and experimental procedures & characterization**

#### **S1.3. Protein expression**

#### **S1.4. Ligation**

#### **S1.5. Biochemical assays**

### **S2.0. Additional information on the design, ligation data and TR-FRET experiments.**

**Figure S1:** Overlay of the crystal structures of ROR $\gamma$ t and PPAR $\gamma$ , demonstrating the similar positioning of the cysteine residue Cys320/Cys285.

**Figure S2:** Q-TOF ligation data of ROR $\gamma$ t and a Cys320Ala ROR $\gamma$ t mutant to **GW9662**.

**Figure S3:** Docking poses of **GW9662** and compound **9** in ROR $\gamma$ t.

**Figures S4:** Overlay of the co-crystal structure of ROR $\gamma$ t with inverse agonist **T0901317** and docking pose of **GW9662**.

**Figure S5:** TR-FRET coactivator recruitment ligand binding assay with ligated ROR $\gamma$ t by titration of various orthosteric and allosteric ligands to compound **15**-ligated protein and compound **18**-ligated protein.

**Figure S6-S16:** Q-TOF ligation data of ROR $\gamma$ t to all compounds.

**Scheme S1:** Synthesis route to obtain the compounds via an amide coupling reaction.

**Table S1.** Optimal ligation conditions for all compounds.

### **S3.0. NMR spectra ( $^1\text{H}$ & $^{13}\text{C}$ ) and LC-UV/TIC traces for assayed compounds.**

## SUPPORTING INFORMATION

### **S1.0. Experimental section**

#### **S1.1 *In silico* measurements**

The molecular modeling environment Maestro 11.1 (Schrödinger) was used with no changes to the default parameters throughout. The crystal structure (PDB ID 3L0L) was prepared for the docking simulation using the Protein Preparation Wizard. A receptor grid was generated using the Receptor Grid Generation tool. The examined ligands were drawn in ChemDraw and prepared using the Ligand Preparation tool. Lastly, the prepared ligands were docked into the generated receptor grid using the Covalent Docking tool to obtain the corresponding docking scores.

#### **S1.2. General Chemistry and experiments procedures & characterization**

All solvents were supplied by Biosolve and used without further purification. Dry solvent was obtained from a MBRAUN Solvent Purification System (MB-SPS-800). Water was purified by a Millipore purification train. Deuterated solvents were obtained from Cambridge Isotope Laboratories. Solvents were removed *in vacuo* using a Büchi rotary evaporator and a diaphragm pump. All reagents were commercially available and were supplied by Sigma-Aldrich, TCI Chemicals, Fluorochem and Iris Biochem GmbH. Proton (<sup>1</sup>H) NMR (400 MHz), carbon (<sup>13</sup>C) NMR (100 MHz) and 2D NMR (400 MHz) were recorded on a Bruker Avance 400 MHz spectrometer. Proton spectra are referenced to tetramethyl silane (TMS). Carbon spectra are referenced to TMS or the solvent peak of the deuterated spectrum. NMR spectra are reported as follows: chemical shift ( $\delta$ ) in parts per million (ppm), multiplicity (s = singlet, d = doublet, t = triplet, q = quartet, m = multiplet, dd = doublet of doublet, td = triplet of doublets), coupling constant (J) in Hertz (Hz) (if applicable) and integration (proton spectra only). Peak assignments are based on additional 2D NMR techniques (COSY, HMBC, HSQC). Analytical Liquid

Chromatography coupled with Mass Spectrometry (LC-MS) was performed on a C4 Jupiter SuC4300A 150 x 2.0 mm column using ultrapure water with 0.1% formic acid (FA) and acetonitrile with 0.1% FA, in general with a gradient of 5% to 100% acetonitrile over 10 minutes, connected to a Thermo Fischer LCQ Fleet Ion Trap Mass Spectrometer. The purity of the samples was assessed using a UV detector at 254 nm. Unless otherwise stated all final compounds were >95% pure as judged by HPLC. High resolution mass spectra (HRMS) were recorded using a Waters ACQUITY UPLC I-Class LC system coupled to a Xevo G2 Quadrupole Time of Flight (Q-TOF) mass spectrometer. Manual column chromatography was performed using silica gel with a particle size of 60-200  $\mu\text{m}$  (60  $\text{\AA}$ ). For manual chromatography, solid loading was used. Reaction progress was monitored by thin-layer liquid chromatography (TLC) using Merck TLC silica gel 60 F254 plates. Visualization of the plates was achieved using an ultraviolet lamp ( $\lambda_{\text{max}} = 254 \text{ nm}$ ).

**General Procedure for Amide Coupling (all compounds, except GW9662, SB1404, 3, 4, 11, 13, 14, 22 and 23)**

The amine (2.95 mmol) was dissolved in dry pyridine (2.5 mL) and cooled to 0 °C under argon. 2-Chloro-5-nitrobenzoyl chloride (2.27 mmol, 500 mg) was added to the reaction mixture. The mixture was stirred overnight at room temperature. Subsequently, the mixture was poured into ice and the resulting solid was filtered, washed with water and freeze dried to obtain the product.<sup>1</sup>

**GW9662 (compound 1) (2-chloro-5-nitro-*N*-phenylbenzamide)**

2-Chloro-5-nitrobenzoyl chloride (1.00 g, 5.56 mmol) was dissolved in a solution of DCM (25 mL) and triethylamine (0.7 mL, 5.0 mmol) at 0 °C under argon. Aniline (0.44 mL, 4.8 mmol) was added dropwise. The reaction mixture was stirred for 5 min at 0 °C followed by 15 min at room temperature. The solution was diluted with EtOAc (60 mL) and washed with 1 M HCl, H<sub>2</sub>O, 1 M NaHCO<sub>3</sub> and brine (20 mL each). The combined organic phase was dried over MgSO<sub>4</sub>, filtered

and concentrated *in vacuo*. The crude mixture was purified by recrystallization from EtOAc resulting in the product (1105 mg, 85%). <sup>1</sup>H NMR (400 MHz, CDCl<sub>3</sub>): δ (ppm) 8.61 (d, 1H), 8.25 (dd, 1H), 7.84 (s, 1H), 7.75 - 7.57 (m, 3H), 7.41 (t, 2H), 7.22 (t, 1H); <sup>13</sup>C NMR (100 MHz, CDCl<sub>3</sub>): δ (ppm) 162.32, 146.75, 137.68, 137.01, 136.68, 131.73, 129.41, 126.09, 125.68, 125.41, 120.48; LC-MS (ESI): calc. for C<sub>13</sub>H<sub>9</sub>ClN<sub>2</sub>O<sub>3</sub> [M+H]<sup>+</sup>: 277.04, observed 277.17, LC R<sub>t</sub>: 6.29 min. HRMS (ESI): calc. for C<sub>13</sub>H<sub>9</sub>ClN<sub>2</sub>O<sub>3</sub> [M+H]<sup>+</sup>: 277.0380, observed: 277.0372. Data was consistent with that previously reported.<sup>2</sup>

#### **SB1404 (compound 2) (2-chloro-5-nitro-*N*-methylbenzamide)**

2-Chloro-5-nitrobenzoylchloride (500 mg, 2.27 mmol) was dissolved in a solution of DCM (10 mL) and triethylamine (0.79 mL, 5.68 mmol) at 0 °C. A solution of methylamine (2.0 M in THF, 2.95 mmol, 1.5 mL) was added dropwise. The reaction mixture was stirred overnight at room temperature under argon. The reaction mixture was diluted with DCM (20 mL) and washed with NH<sub>4</sub>Cl (50 mL) and H<sub>2</sub>O (50 mL). The combined organic phase was dried over MgSO<sub>4</sub>, filtered and concentrated *in vacuo*. The crude solid was purified by column chromatography, eluting with 100% DCM to furnish the product (38 mg, 8%). <sup>1</sup>H NMR (400 MHz, CDCl<sub>3</sub>): δ (ppm) 8.62 (s, 1H), 8.25 (d, *J* = 9.5 Hz, 2H), 7.82 (d, *J* = 8.5 Hz, 1H), 2.80 (d, *J* = 4.6 Hz, 3H); <sup>13</sup>C NMR (100 MHz, CDCl<sub>3</sub>): δ (ppm) 164.68, 146.00, 137.84, 137.06, 131.29, 125.35, 123.70, 26.03; LC-MS (ESI): calc. for C<sub>8</sub>H<sub>7</sub>ClN<sub>2</sub>O<sub>3</sub> [M+H]<sup>+</sup>: 215.02, observed 215.00, LC R<sub>t</sub>: 3.35 min. HRMS (ESI): calc. for C<sub>8</sub>H<sub>7</sub>ClN<sub>2</sub>O<sub>3</sub> [M+H]<sup>+</sup>: 215.0223, observed: 215.0221. Data was consistent with that previously reported.<sup>3</sup>

#### **Compound 3 (2-chloro-5-nitro-*N*-isopropylbenzamide)**

2-Chloro-5-nitrobenzoylchloride (250 mg, 1.24 mmol) was dissolved in THF (8 mL) at 0 °C. Isopropylamine (0.061 mL, 1.49 mmol) and triethylamine (0.1 mL, 1.49 mmol) were added

dropwise. The reaction mixture was stirred overnight at room temperature under argon. Saturated NaHCO<sub>3</sub> (50 mL) was added to the reaction mixture and it was extracted twice with DCM (2 x 50 mL). The combined organic phase was washed with aqueous saturated NaCl (50 mL), dried over MgSO<sub>4</sub>, filtered and concentrated *in vacuo*. The crude solid was purified by recrystallization from 1:1 water/EtOH, resulting in the product (105 mg, 35%). <sup>1</sup>H NMR (400 MHz, CDCl<sub>3</sub>): δ (ppm) 8.45 (d, *J* = 2.7 Hz, 1H), 8.17 (dd, *J* = 8.8, 2.7 Hz, 1H), 7.57 (d, *J* = 8.8 Hz, 1H), 5.99 (s, 1H), 4.37-4.25 (m, 1H), 1.30 (d, *J* = 6.6 Hz, 6H); <sup>13</sup>C NMR (100 MHz, CDCl<sub>3</sub>): δ (ppm) 163.40, 146.54, 137.48, 136.92, 131.33, 125.45, 125.04, 42.71, 29.71, 22.56; LC-MS (ESI): calc. for C<sub>10</sub>H<sub>11</sub>ClN<sub>2</sub>O<sub>3</sub> [M+H]<sup>+</sup>: 243.06, observed 243.08, LC R<sub>t</sub>: 4.73 min. HRMS (ESI): calc. for C<sub>10</sub>H<sub>11</sub>ClN<sub>2</sub>O<sub>3</sub> [M+H]<sup>+</sup>: 243.0536, observed: 243.0540.<sup>3</sup>

#### **Compound 4 (N-allyl-2-chloro-5-nitrobenzamide)**

Allylamine (1.61 mmol) was dissolved in dry pyridine (1.4 mL) and the reaction mixture was cooled to 0 °C under argon. 2-Chloro-5-nitrobenzoyl chloride (1.24 mmol, 250 mg) was added to the reaction mixture. The mixture was stirred overnight at room temperature. Subsequently, the mixture was poured into ice. The resulting solid was filtered, washed with water and freeze dried to furnish the product (32 mg, 11%). <sup>1</sup>H NMR (400 MHz, CDCl<sub>3</sub>): δ (ppm) 8.51 (d, *J* = 2.7 Hz, 1H), 8.21 (dd, *J* = 8.8, 2.7 Hz, 1H), 7.59 (d, *J* = 8.8 Hz, 1H), 6.30 (s, 1H), 6.01-5.88 (m, 1H), 5.37-5.20 (m, 2H), 4.16-4.09 (m, 2H); <sup>13</sup>C NMR (100 MHz, CDCl<sub>3</sub>): δ (ppm) 164.05, 146.57, 137.51, 136.37, 133.05, 131.47, 125.71, 125.29, 117.52, 42.73; LC-MS (ESI): calc. for C<sub>10</sub>H<sub>9</sub>ClN<sub>2</sub>O<sub>3</sub> [M+H]<sup>+</sup>: 241.04, observed 241.00, LC R<sub>t</sub>: 4.55 min. HRMS (ESI): calc. for C<sub>10</sub>H<sub>9</sub>ClN<sub>2</sub>O<sub>3</sub> [M+H]<sup>+</sup>: 241.0380, observed: 241.0378.<sup>1</sup>

#### **Compound 5 (2-chloro-5-nitro-N-cyclohexylbenzamide)**

According to the General Procedure for amide coupling, cyclohexylamine (2.95 mmol) was reacted with 2-chloro-5-nitrobenzoyl chloride to furnish the product (69 mg, 11%). <sup>1</sup>H NMR (400 MHz, DMSO-d<sub>6</sub>): δ (ppm) 8.55 (d, *J* = 7.7 Hz, 1H), 8.25 (dd, *J* = 8.8, 2.8 Hz, 1H), 8.18 (d, *J* = 2.7 Hz, 1H), 7.82 (d, *J* = 8.8 Hz, 1H), 3.80-3.66 (m, 1H), 1.90-1.79 (m, 2H), 1.78-1.65 (m, 2H), 1.62-1.52 (m, 1H), 1.40-1.07 (m, 5H); <sup>13</sup>C NMR (100 MHz, DMSO-d<sub>6</sub>): δ (ppm) 163.79, 146.45, 138.70, 137.53, 131.64, 125.61, 123.93, 48.78, 32.55, 25.63, 24.95; LC-MS (ESI): calc. for C<sub>13</sub>H<sub>15</sub>ClN<sub>2</sub>O<sub>3</sub> [M+H]<sup>+</sup>: 283.09, observed 283.08, LC R<sub>t</sub>: 6.01 min. HRMS (ESI): calc. for C<sub>13</sub>H<sub>15</sub>ClN<sub>2</sub>O<sub>3</sub> [M+H]<sup>+</sup>: 283.0849, observed: 283.0852.

#### **Compound 6 (*N*-benzyl-2-chloro-5-nitrobenzamide)**

According to the General Procedure for amide coupling, benzylamine (2.95 mmol) was reacted with 2-chloro-5-nitrobenzoyl chloride to furnish the product (140 mg, 21%). <sup>1</sup>H NMR (400 MHz, DMSO-d<sub>6</sub>): δ (ppm) 9.22 (t, *J* = 5.8 Hz, 1H), 8.33-8.23 (m, 2H), 7.86-7.80 (m, 1H), 7.44-7.32 (m, 4H), 7.32-7.23 (m, 1H), 4.49 (d, *J* = 6.0 Hz, 2H); <sup>13</sup>C NMR (100 MHz, DMSO-d<sub>6</sub>): δ (ppm) 164.86, 146.49, 139.09, 138.13, 137.56, 131.80, 128.85, 127.84, 127.47, 125.93, 124.16, 43.15; LC-MS (ESI): calc. for C<sub>14</sub>H<sub>11</sub>ClN<sub>2</sub>O<sub>3</sub> [M+H]<sup>+</sup>: 291.06, observed 291.08, LC R<sub>t</sub>: 6.47 min. HRMS (ESI): calc. for C<sub>14</sub>H<sub>11</sub>ClN<sub>2</sub>O<sub>3</sub> [M+H]<sup>+</sup>: 291.0536, observed: 291.0523.

#### **Compound 7 (2-chloro-5-nitro-*N*-(*p*-tolyl)benzamide)**

According to the General Procedure for amide coupling, *p*-toluidine (2.95 mmol) was reacted with 2-chloro-5-nitrobenzoyl chloride to furnish the product (580 mg, 88%). <sup>1</sup>H NMR (400 MHz, DMSO-d<sub>6</sub>): δ (ppm) 10.61 (s, 1H), 8.44 (d, *J* = 2.6 Hz, 1H), 8.32 (dd, *J* = 8.8, 2.6 Hz, 1H), 7.89 (d, *J* = 8.8 Hz, 1H), 7.58 (d, *J* = 8.2 Hz, 2H), 7.19 (d, *J* = 8.2 Hz, 2H), 2.29 (s, 3H); <sup>13</sup>C NMR (100 MHz, DMSO-d<sub>6</sub>): δ (ppm) 163.01, 146.60, 138.30, 137.57, 136.48, 133.71, 131.79, 129.69,



126.08, 124.31, 120.23; LC-MS (ESI): calc. for  $C_{14}H_{11}ClN_2O_3$   $[M+H]^+$ : 291.06, observed 291.08, LC  $R_t$ : 6.22 min. HRMS (ESI): calc. for  $C_{14}H_{11}ClN_2O_3$   $[M+H]^+$ : 291.0536, observed: 291.0532.

**Compound 8 (2-chloro-5-nitro-*N*-(*m*-tolyl)benzamide)**

According to the General Procedure for amide coupling, *m*-toluidine (2.95 mmol) was reacted with 2-chloro-5-nitrobenzoyl chloride to furnish the product (620 mg, 94%).  $^1H$  NMR (400 MHz, DMSO- $d_6$ ):  $\delta$  (ppm) 10.62 (s, 1H), 8.43 (d,  $J = 2.7$  Hz, 1H), 8.33 (dd,  $J = 8.8, 2.8$  Hz, 1H), 7.90 (d,  $J = 8.8$  Hz, 1H), 7.56 (s, 1H), 7.48 (d,  $J = 8.3$  Hz, 1H), 7.25 (t,  $J = 7.8$  Hz, 1H), 6.98 (d,  $J = 7.5$  Hz, 1H), 2.32 (s, 3H);  $^{13}C$  NMR (100 MHz, DMSO- $d_6$ ):  $\delta$  (ppm) 163.18, 146.61, 138.88, 138.59, 138.27, 137.55, 131.80, 129.17, 126.12, 125.39, 124.28, 120.73, 117.45, 21.66; LC-MS (ESI): calc. for  $C_{14}H_{11}ClN_2O_3$   $[M+H]^+$ : 291.06, observed 291.08, LC  $R_t$ : 6.24 min. HRMS (ESI): calc. for  $C_{14}H_{11}ClN_2O_3$   $[M+H]^+$ : 291.0536, observed: 291.0529.

**Compound 9 (2-chloro-5-nitro-*N*-(*o*-tolyl)benzamide)**

According to the General Procedure for amide coupling, *o*-toluidine (2.95 mmol) was reacted with 2-chloro-5-nitrobenzoyl chloride to furnish the product (421 mg, 64%).  $^1H$  NMR (400 MHz, DMSO- $d_6$ ):  $\delta$  (ppm) 10.18 (s, 1H), 8.47 (d,  $J = 2.7$  Hz, 1H), 8.33 (dd,  $J = 8.8, 2.8$  Hz, 1H), 7.89 (d,  $J = 8.8$  Hz, 1H), 7.50 (d,  $J = 7.9$  Hz, 1H), 7.30-7.14 (m, 3H), 2.30 (s, 3H);  $^{13}C$  NMR (100 MHz, DMSO- $d_6$ ):  $\delta$  (ppm) 163.58, 146.62, 138.43, 137.53, 135.78, 133.31, 131.78, 130.93, 126.68, 126.55, 126.37, 126.03, 124.31, 39.99, 18.43; LC-MS (ESI): calc. for  $C_{14}H_{11}ClN_2O_3$   $[M+H]^+$ : 291.06, observed 291.08, LC  $R_t$ : 5.82 min. HRMS (ESI): calc. for  $C_{14}H_{11}ClN_2O_3$   $[M+H]^+$ : 291.0536, observed: 291.0537.

**Compound 10 (2-chloro-5-nitro-*N*-(4-methoxyphenyl)benzamide)**

According to the General Procedure for amide coupling, *p*-anisidine (2.95 mmol) was reacted with 2-chloro-5-nitrobenzoyl chloride to furnish the product (661 mg, 95%).  $^1H$  NMR (400 MHz,

DMSO- $d_6$ ):  $\delta$  (ppm) 10.56 (s, 1H), 8.43 (d,  $J = 2.6$  Hz, 1H), 8.34 (dd,  $J = 8.8, 2.7$  Hz, 1H), 7.89 (d,  $J = 8.8$  Hz, 1H), 7.61 (d,  $J = 8.9$  Hz, 2H), 6.96 (d,  $J = 8.9$  Hz, 2H), 3.75 (s, 3H);  $^{13}\text{C}$  NMR (100 MHz, DMSO- $d_6$ ):  $\delta$  (ppm) 162.78, 156.35, 146.60, 138.34, 137.59, 132.07, 131.79, 126.05, 124.30, 121.79, 114.45, 55.71; LC-MS (ESI): calc. for  $\text{C}_{14}\text{H}_{11}\text{ClN}_2\text{O}_4$   $[\text{M}+\text{H}]^+$ : 307.05, observed 307.17, LC  $R_t$ : 5.78 min. HRMS (ESI): calc. for  $\text{C}_{14}\text{H}_{11}\text{ClN}_2\text{O}_4$   $[\text{M}+\text{H}]^+$ : 307.0486, observed: 307.0478.

### **Compound 11 (2-chloro-5-nitro-*N*-(thiophen-3-yl)benzamide)**

Thiophen-3-amine hydrochloride (1.61 mmol) was dissolved in dry pyridine (1.3 mL) and the reaction mixture was cooled to  $0^\circ\text{C}$  under argon. 2-Chloro-5-nitrobenzoyl chloride (1.24 mmol, 250 mg) was added to the reaction mixture. The mixture was stirred overnight at room temperature. Subsequently, the mixture was poured into ice. The resulting solid was filtered, washed with water and freeze dried to furnish the product (243 mg, 70%).  $^1\text{H}$  NMR (400 MHz,  $\text{CDCl}_3$ ):  $\delta$  (ppm) 11.09 (s, 1H), 8.44 (d,  $J = 2.7$  Hz, 1H), 8.35 (dd,  $J = 8.8$  Hz, 1H), 7.90 (d,  $J = 8.8$  Hz, 1H), 7.70 (dd,  $J = 3.2, 1.3$  Hz, 1H), 7.56-7.49 (m, 1H), 7.18 (dd,  $J = 5.2, 1.3$  Hz, 1H);  $^{13}\text{C}$  NMR (100 MHz,  $\text{CDCl}_3$ ):  $\delta$  (ppm) 162.25, 146.59, 137.73, 137.67, 136.53, 131.86, 126.26, 125.62, 124.40, 122.00, 110.65; LC-MS (ESI): calc. for  $\text{C}_{11}\text{H}_7\text{ClN}_2\text{O}_3\text{S}$   $[\text{M}+\text{H}]^+$ : 283.00, observed 283.00, LC  $R_t$ : 5.91 min. HRMS (ESI): calc. for  $\text{C}_{11}\text{H}_7\text{ClN}_2\text{O}_3\text{S}$   $[\text{M}+\text{H}]^+$ : 282.9944, observed: 282.9944.<sup>1</sup>

### **Compound 12 (5-chloro-2-nitro-*N*-phenylbenzamide)**

First, 5-chloro-2-nitrobenzoyl chloride was synthesized by dissolving 5-chloro-2-nitrobenzoic acid (457.5 mg, 2.27 mmol) in thionylchloride (8.3 mL). The reaction mixture was concentrated *in vacuo*, obtaining 5-chloro-2-nitrobenzoyl chloride (100% yield, 500 mg).

According to the General Procedure for amide coupling, aniline (2.95 mmol) was reacted with 5-chloro-2-nitrobenzoyl chloride to furnish the product (545 mg, 87%).  $^1\text{H}$  NMR (400 MHz, DMSO-

d<sub>6</sub>):  $\delta$  (ppm) 10.71 (s, 1H), 8.20 (d,  $J$  = 8.8 Hz, 1H), 7.95 (d,  $J$  = 2.3 Hz, 1H), 7.86 (dd,  $J$  = 8.8, 2.3 Hz, 1H), 7.68-7.62 (m, 2H), 7.40-7.33 (m, 2H), 7.17-7.09 (m, 1H); <sup>13</sup>C NMR (100 MHz, DMSO-d<sub>6</sub>):  $\delta$  (ppm) 162.99, 145.47, 139.22, 139.07, 134.73, 131.22, 129.63, 129.33, 126.82, 124.59, 120.17; LC-MS (ESI): calc. for C<sub>13</sub>H<sub>9</sub>ClN<sub>2</sub>O<sub>3</sub> [M+H]<sup>+</sup>: 277.04, observed 277.00, LC R<sub>t</sub>: 5.89 min. HRMS (ESI): calc. for C<sub>13</sub>H<sub>9</sub>ClN<sub>2</sub>O<sub>3</sub> [M+H]<sup>+</sup>: 277.0380, observed: 277.0368.

### **Compound 13 (2-chloro-5-nitro-*N*-(4-nitrophenyl)benzamide)**

2-Chloro-5-nitro-*N*-(4-nitrophenyl)benzamide was synthesized as described in the patent of Amemiya et al.<sup>4</sup> 4-Nitroaniline (263 mg, 1.9 mmol) was dissolved in DMA (5 mL). 2-Chloro-5-nitrobenzoylchloride (500 mg, 2.27 mmol) was added and the reaction mixture was stirred overnight at room temperature. Ethyl acetate (5 mL) and saturated aqueous sodium bicarbonate (30 mL) were added and the mixture was stirred for 1 h. H<sub>2</sub>O (10 mL) was added and the reaction mixture was stirred again for 1 h. The resulting crystals were filtered and freeze dried to furnish the product (502 mg, 82%). <sup>1</sup>H NMR (400 MHz, DMSO-d<sub>6</sub>):  $\delta$  (ppm) 11.31 (s, 1H), 8.56 (d,  $J$  = 2.7 Hz, 1H), 8.36 (dd,  $J$  = 8.8, 2.8 Hz, 1H), 8.28 (d,  $J$  = 9.2 Hz, 2H), 7.99-7.87 (m, 3H); <sup>13</sup>C NMR (100 MHz, DMSO-d<sub>6</sub>):  $\delta$  (ppm) 164.04, 146.63, 145.35, 143.31, 137.62, 137.51, 131.89, 126.52, 125.49, 124.57, 120.18; LC-MS (ESI): calc. for C<sub>13</sub>H<sub>8</sub>ClN<sub>3</sub>O<sub>5</sub> [M+H]<sup>+</sup>: 322.02, observed 322.17, LC R<sub>t</sub>: 4.70 min. HRMS (ESI): calc. for C<sub>13</sub>H<sub>8</sub>ClN<sub>3</sub>O<sub>5</sub> [M+H]<sup>+</sup>: 322.0231, observed: 322.0227.

### **Compound 14 (2-chloro-5-nitrophenyl)(1*H*-pyrrol-1-yl)methanone)**

(2-Chloro-5-nitrophenyl)(1*H*-pyrrol-1-yl)methanone was synthesized as described by D'Silva et al.<sup>5</sup> Triethylamine (0.32 mL, 2.3 mmol) and pyrrole (0.21 mL, 3.1 mmol) were dissolved in DCM (1.23 mL, 19.2 mmol). DMAP (27.7 mg, 0.227 mmol) and 2-chloro-5-nitrobenzoyl chloride (500 mg, 2.27 mmol) were then added to the reaction mixture and it was stirred overnight at room temperature. The reaction mixture was diluted in DCM and washed with NaHCO<sub>3</sub> and H<sub>2</sub>O, dried

over MgSO<sub>4</sub>, filtered and concentrated *in vacuo*. The resulting solid was freeze dried to furnish the product (406 mg, 72%). <sup>1</sup>H NMR (400 MHz, DMSO-d<sub>6</sub>): δ (ppm) 8.65 (d, *J* = 2.7 Hz, 1H), 8.43 (dd, *J* = 8.9, 2.7 Hz, 1H), 7.97 (d, *J* = 8.9 Hz, 1H), 7.24 (s, 2H), 6.42 (t, *J* = 4.0 Hz, 2H); <sup>13</sup>C NMR (100 MHz, DMSO-d<sub>6</sub>): δ (ppm) 163.30, 146.92, 137.20, 134.68, 131.98, 127.42, 125.03, 121.08, 114.98; LC-MS (ESI): calc. for C<sub>11</sub>H<sub>7</sub>ClN<sub>2</sub>O<sub>3</sub> [M+H]<sup>+</sup>: 251.02, observed 251.00, LC R<sub>t</sub>: 4.75 min. HRMS (ESI): calc. for C<sub>11</sub>H<sub>7</sub>ClN<sub>2</sub>O<sub>3</sub> [M+H]<sup>+</sup>: 251.0223, observed: 251.0231.

#### **Compound 15 (2-chloro-5-nitro-*N*-(2-ethylphenyl)benzamide)**

According to the General Procedure for amide coupling, 2-ethylaniline (2.95 mmol) was reacted with 2-chloro-5-nitrobenzoyl chloride to furnish the product (573 mg, 83%). <sup>1</sup>H NMR (400 MHz, DMSO-d<sub>6</sub>): δ (ppm) 10.18 (s, 1H), 8.46 (d, *J* = 2.8 Hz, 1H), 8.33 (dd, *J* = 8.8, 2.8 Hz, 1H), 7.89 (d, *J* = 8.9 Hz, 1H), 7.51-7.48 (m, 1H), 7.33-7.21 (m, 3H), 2.68 (q, *J* = 7.5 Hz, 2H), 1.17 (t, *J* = 7.5 Hz, 3H); <sup>13</sup>C NMR (100 MHz, DMSO-d<sub>6</sub>): δ (ppm) 164.04, 146.63, 139.48, 138.49, 137.51, 135.07, 131.80, 129.22, 127.29, 127.16, 126.57, 126.02, 124.25, 24.31, 14.99; LC-MS (ESI): calc. for C<sub>15</sub>H<sub>13</sub>ClN<sub>2</sub>O<sub>3</sub> [M+H]<sup>+</sup>: 305.74, observed 305.25, LC R<sub>t</sub>: 6.27 min. HRMS (ESI): calc. for C<sub>15</sub>H<sub>13</sub>ClN<sub>2</sub>O<sub>3</sub> [M+H]<sup>+</sup>: 305.0693, observed: 305.0680.

#### **Compound 16 (2-chloro-5-nitro-*N*-(2-(tert-butyl)phenyl)benzamide)**

According to the General Procedure for amide coupling, 2-(tert-butyl)aniline (2.95 mmol) was reacted with 2-chloro-5-nitrobenzoyl chloride to furnish the product (593 mg, 71%). <sup>1</sup>H NMR (400 MHz, DMSO-d<sub>6</sub>): δ (ppm) 10.16 (s, 1H), 8.39 (d, *J* = 2.5 Hz, 1H), 8.34 (dd, *J* = 8.7, 2.8 Hz, 1H), 7.90 (d, *J* = 8.8 Hz, 1H), 7.51-7.42 (m, 1H), 7.37-7.25 (m, 3H), 1.39 (s, 9H); <sup>13</sup>C NMR (100 MHz, DMSO-d<sub>6</sub>): δ (ppm) 164.86, 147.33, 146.54, 138.44, 137.69, 135.55, 132.16, 131.93, 128.08, 127.30, 127.15, 126.03, 123.86, 35.34, 31.31; LC-MS (ESI): calc. for C<sub>17</sub>H<sub>17</sub>ClN<sub>2</sub>O<sub>3</sub> [M+H]<sup>+</sup>:

333.79, observed 333.08, LC R<sub>t</sub>: 6.63 min. HRMS (ESI): calc. for C<sub>17</sub>H<sub>17</sub>ClN<sub>2</sub>O<sub>3</sub> [M+H]<sup>+</sup>: 333.1006, observed: 333.0995.

**Compound 17 (2-chloro-5-nitro-*N*-(2-fluorophenyl)benzamide)**

According to the General Procedure for amide coupling, 2-fluoroaniline (2.95 mmol) was reacted with 2-chloro-5-nitrobenzoyl chloride to furnish the product after recrystallization from ethyl acetate/hexane (50/50) (158 mg, 46%). <sup>1</sup>H NMR (400 MHz, Acetone-d<sub>6</sub>): δ (ppm) 9.68 (s, 1H), 8.53 (d, *J* = 2.8 Hz, 1H), 8.35 (dd, *J* = 8.8, 2.8 Hz, 1H), 8.31-8.27 (m, 1H), 7.84 (d, *J* = 8.8 Hz, 1H), 7.30-7.20 (m, 3H); <sup>13</sup>C NMR (100 MHz, Acetone-d<sub>6</sub>): δ (ppm) 164.00, 155.92, 153.47, 147.46, 138.47, 132.19, 126.94, 126.83, 126.77, 126.75, 126.70, 126.67, 126.55, 125.34, 125.07, 124.54, 124.42, 116.29; LC-MS (ESI): calc. for C<sub>13</sub>H<sub>8</sub>ClFN<sub>2</sub>O<sub>3</sub> [M+H]<sup>+</sup>: 295.68, observed 295.17, LC R<sub>t</sub>: 5.96 min. HRMS (ESI): calc. for C<sub>13</sub>H<sub>8</sub>ClFN<sub>2</sub>O<sub>3</sub> [M+H]<sup>+</sup>: 295.0286, observed: 295.0293.

**Compound 18 (2-chloro-5-nitro-*N*-(2-methoxyphenyl)benzamide)**

According to the General Procedure for amide coupling, 2-methoxyaniline (2.95 mmol) was reacted with 2-chloro-5-nitrobenzoyl chloride to furnish the product after recrystallization from ethanol (212 mg, 30%). <sup>1</sup>H NMR (400 MHz, DMSO-d<sub>6</sub>): δ (ppm) 10.00 (s, 1H), 8.38 (d, *J* = 2.8 Hz, 1H), 8.32 (dd, *J* = 8.8, 2.8 Hz, 1H), 7.98 (dd, *J* = 7.9, 1.6 Hz, 1H), 7.85 (d, *J* = 8.8 Hz, 1H), 7.19 (t, *J* = 7.5 Hz, 1H), 7.10 (d, *J* = 8.3 Hz, 1H), 6.99 (t, *J* = 7.6 Hz, 1H), 3.83 (s, 3H); <sup>13</sup>C NMR (100 MHz, DMSO-d<sub>6</sub>): δ (ppm) 163.57, 151.22, 146.46, 138.24, 137.65, 131.66, 126.82, 126.29, 125.94, 124.47, 123.74, 120.73, 112.05, 56.22; LC-MS (ESI): calc. for C<sub>14</sub>H<sub>11</sub>ClN<sub>2</sub>O<sub>4</sub> [M+H]<sup>+</sup>: 307.71, observed 307.17, LC R<sub>t</sub>: 6.19 min. HRMS (ESI): calc. for C<sub>14</sub>H<sub>11</sub>ClN<sub>2</sub>O<sub>4</sub> [M+H]<sup>+</sup>: 307.0486, observed: 307.0487.

**Compound 19 (2-chloro-5-nitro-*N*-(2,6-dimethylphenyl)benzamide)**

According to the General Procedure for amide coupling, 2,6-dimethylaniline (2.95 mmol) was reacted with 2-chloro-5-nitrobenzoyl chloride to furnish the product (504 mg, 73%). <sup>1</sup>H NMR (400 MHz, DMSO-d<sub>6</sub>): δ (ppm) 10.14 (s, 1H), 8.38-8.33 (m, 2H), 7.94-7.88 (m, 1H), 7.18-7.10 (m, 3H), 2.30 (s, 6H); <sup>13</sup>C NMR (100 MHz, DMSO-d<sub>6</sub>): δ (ppm) 162.93, 146.19, 137.90, 137.01, 135.36, 133.94, 131.55, 127.95, 127.10, 125.69, 123.50, 18.28; LC-MS (ESI): calc. for C<sub>15</sub>H<sub>13</sub>ClN<sub>2</sub>O<sub>3</sub> [M+H]<sup>+</sup>: 305.74, observed 305.25, LC R<sub>t</sub>: 6.09 min. HRMS (ESI): calc. for C<sub>15</sub>H<sub>13</sub>ClN<sub>2</sub>O<sub>3</sub> [M+H]<sup>+</sup>: 305.0693, observed: 305.0682.

**Compound 20 (2-chloro-5-nitro-N-(2-(trifluoromethyl)phenyl)benzamide)**

According to the General Procedure for amide coupling, 2-(trifluoromethyl)aniline (2.95 mmol) was reacted with 2-chloro-5-nitrobenzoyl chloride to furnish the product after recrystallization from ethanol (124 mg, 32%). <sup>1</sup>H NMR (400 MHz, Acetone-d<sub>6</sub>): δ (ppm) 9.52 (s, 1H), 8.50 (d, *J* = 2.7 Hz, 1H), 8.36 (dd, *J* = 8.8, 2.7 Hz, 1H), 7.98 (d, *J* = 8.0 Hz, 1H), 7.86 (d, *J* = 8.9 Hz, 1H), 7.84-7.75 (m, 2H), 7.55 (t, *J* = 7.5 Hz, 1H); <sup>13</sup>C NMR (100 MHz, Acetone-d<sub>6</sub>): δ (ppm) 164.75, 147.46, 138.51, 138.32, 135.48, 133.93, 132.37, 130.25, 128.81, 128.00, 127.27, 126.68, 126.10, 125.78, 125.48, 124.87, 123.41; LC-MS (ESI): calc. for C<sub>14</sub>H<sub>8</sub>ClF<sub>3</sub>N<sub>2</sub>O<sub>3</sub> [M+H]<sup>+</sup>: 345.68, observed 345.17, LC R<sub>t</sub>: 6.29 min. HRMS (ESI): calc. for C<sub>14</sub>H<sub>8</sub>ClF<sub>3</sub>N<sub>2</sub>O<sub>3</sub> [M+H]<sup>+</sup>: 345.0254, observed: 345.0246.

**Compound 21 (2-chloro-5-nitro-N-(naphthalen-1-yl)benzamide)**

According to the General Procedure for amide coupling, naphthalen-1-amine (2.95 mmol) was reacted with 2-chloro-5-nitrobenzoyl chloride to furnish the product after recrystallization from ethanol (199 mg, 54%). <sup>1</sup>H NMR (400 MHz, DMSO-d<sub>6</sub>): δ (ppm) 10.76 (s, 1H), 8.62 (d, *J* = 2.8 Hz, 1H), 8.37 (dd, *J* = 8.7, 3.0 Hz, 1H), 8.20-8.14 (m, 1H), 8.01-7.96 (m, 1H), 7.93 (d, *J* = 8.8 Hz, 1H), 7.88 (d, *J* = 7.9 Hz, 1H), 7.83 (d, *J* = 7.8 Hz, 1H), 7.63-7.54 (m, 3H); <sup>13</sup>C NMR (100 MHz,

DMSO- $d_6$ ):  $\delta$  (ppm) 163.93, 146.24, 138.03, 137.13, 133.76, 132.65, 131.32, 128.22, 128.17, 126.38, 126.23, 126.20, 125.66, 125.58, 124.04, 122.92, 122.80; LC-MS (ESI): calc. for  $C_{17}H_{11}ClN_2O_3$   $[M+H]^+$ : 327.75, observed 327.25, LC  $R_t$ : 6.36 min. HRMS (ESI): calc. for  $C_{17}H_{11}ClN_2O_3$   $[M+H]^+$ : 327.0536, observed: 327.0524.

**Compound 22 (2-chloro-5-nitro-*N*-(2-aminophenyl)benzamide)**

*N*-Boc-1,2-phenylenediamine (0.59 mmol) was dissolved in dry pyridine (13 mL) and the reaction mixture was cooled to 0 °C under argon. 2-Chloro-5-nitrobenzoyl chloride (0.45 mmol, 100 mg) was added to the reaction mixture. The mixture was stirred overnight at room temperature. Subsequently, the mixture was poured into ice. The resulting solid was filtered, washed with water and freeze dried to furnish the product which was recrystallized from methanol (9 mg, 11%).  $^1H$  NMR (400 MHz, Acetone- $d_6$ ):  $\delta$  (ppm) 9.23 (s, 1H), 8.56 (d,  $J$  = 3.0 Hz, 1H),  $\delta$  8.34 (dd,  $J$  = 8.8, 2.8 Hz, 1H), 7.84 (d,  $J$  = 8.8 Hz, 1H), 7.44-7.38 (m, 1H), 7.04 (t,  $J$  = 7.6 Hz, 1H), 6.88 (d,  $J$  = 8.0 Hz, 1H), 6.70 (t,  $J$  = 7.6 Hz, 1H), 4.68 (s, 2H);  $^{13}C$  NMR (100 MHz, Acetone- $d_6$ ):  $\delta$  (ppm) 164.03, 147.51, 143.56, 139.08, 138.50, 132.17, 128.01, 126.83, 126.76, 126.32, 125.03, 123.83, 118.08, 117.55; LC-MS (ESI): calc. for  $C_{13}H_{10}ClN_3O_3$   $[M+H]^+$ : 292.70, observed 292.17, LC  $R_t$ : 4.61 min. HRMS (ESI): calc. for  $C_{13}H_{10}ClN_3O_3$   $[M+H]^+$ : 292.0489, observed: 292.0483.<sup>1</sup>

**Compound 23 (2-chloro-5-nitro-*N*-(2-hydroxyphenyl)benzamide)**

2-Aminophenol (6.82 mmol) was dissolved in dry THF (3 ml) and cooled to 0 °C. 2-Chloro-5-nitrobenzoyl chloride (2.27 mmol, 500 mg) was added dropwise to the solution. The reaction mixture was stirred under argon at 0 °C for 3 h. Additionally it was quenched with 5% aqueous hydrochloric acid (2.3 ml), poured in ice and washed with 5% aqueous hydrochloric acid and  $H_2O$ . After trituration in a mixture of ethyl acetate/hexane (50/50), the product was obtained (347 mg, 52%).  $^1H$  NMR (400 MHz, DMSO- $d_6$ ):  $\delta$  (ppm) 9.95 (s, 1H), 9.77 (s, 1H), 8.44 (d,  $J$  = 2.2 Hz,

1H), 8.31 (dd,  $J = 8.8, 2.8$  Hz, 1H), 7.88 – 7.79 (m, 2H), 7.05 (t,  $J = 7.7$  Hz, 1H), 6.93 (d,  $J = 6.6$  Hz, 1H), 6.84 (t,  $J = 7.7$  Hz, 1H);  $^{13}\text{C}$  NMR (100 MHz, DMSO- $d_6$ ):  $\delta$  (ppm) 163.02, 148.97, 145.88, 137.62, 137.13, 131.09, 125.78, 125.38, 125.12, 124.04, 123.63, 118.83, 115.64; LC-MS (ESI): calc. for  $\text{C}_{13}\text{H}_9\text{ClN}_2\text{O}_4$   $[\text{M}+\text{H}]^+$ : 293.69, observed 293.17, LC  $R_t$ : 5.56 min. HRMS (ESI): calc. for  $\text{C}_{13}\text{H}_9\text{ClN}_2\text{O}_4$   $[\text{M}+\text{H}]^+$ : 293.0329, observed: 293.0326.<sup>1</sup>

### **Ligands used in binding studies.**

The ligands used in binding studies were synthesized as described in literature (**MRL-871**<sup>6</sup> and **FM26**<sup>7</sup>, both >95% pure) or they were commercially available (cholesterol derivatives and digoxin).

## **S1.3. Protein Expression**

### **ROR $\gamma$ t-LBD Expression and Purification.**

A pET15b expression vector encoding the human ROR $\gamma$ t LBD (residues 265-507 (used for mutagenesis and corresponding ligation experiments) or residues 265-518 (used for general ligation experiments and biochemical assays)) with an *N*-terminal His<sub>6</sub>-tag was transformed by heat shock into BL21(DE3) *E. coli* cells. Single colonies were used to inoculate pre-cultures of 8 mL LB-media containing 100  $\mu\text{g}/\text{mL}$  ampicillin. After over-night incubation at 37 °C each pre-culture was transferred to 1L TB media supplemented with ampicillin (100  $\mu\text{g}/\text{mL}$ ) and incubated at 37 °C until an  $\text{OD}_{600 \text{ nm}} = 1.0$  was reached. Protein expression was then induced with 0.5 mM isopropyl-b-d-thiogalactoside (IPTG) and cultures were incubated for 16 h at 18 °C. The cells were collected by centrifugation and suspended in lysis buffer (300 mM NaCl, 20 mM TrisHCl pH 8.0, 20 mM imidazole, 1 mM TCEP, 10% v/v glycerol, cOmplete™, EDTA-free Protease Inhibitor Cocktail tablets (1 tablet/ 50 mL lysate) and benzonase (0.1  $\mu\text{L}/ 1 \text{ mL}$ )). After lysis using a C3



Emulsiflex-C3 homogeniser (Avestin) the cell lysate was cleared by centrifugation at 4 °C and the protein was purified via Ni<sup>2+</sup> affinity column chromatography. Fractions containing the protein of interest were combined and dialyzed to 150 mM NaCl, 20 mM Tris (pH=8.0), 5 mM DTT and 10% v/v glycerol.

### **Mutagenesis**

Mutagenesis was introduced using the QuickChange Lightning Multi Site-Directed Mutagenesis Kit from Agilent Technologies. The primer with sequence 5'-tgggaaatgtgggaacgtgcggcacatcacctgacgg-3' was used to mutate the Cys320 residue into an alanine residue. QIAquick Purification Kit from Qiagen was used to purify the mutated DNA.<sup>8</sup>

## **S1.4. Ligation**

### **Ligation Experiment**

Ligation experiments were executed in a buffer with 50 mM TRIS (pH varying from 5.3-5.8), 50 mM NaCl, 5 mM CHAPS and 0.1% Bovine Serum Albumin (BSA). The concentration of ROR $\gamma$ t in the buffer was 20  $\mu$ M and the compound concentration varied from 5 to 10 equivalents (Supporting Table 2). Total volume was 50  $\mu$ L which was incubated (continuous mixing) at 4°C or RT overnight.

### **Q-TOF-MS analysis**

Purity and exact mass of the ligated ROR $\gamma$ t protein was determined using a High-Resolution LC-MS system consisting of a Waters ACQUITY UPLC I-Class system coupled to a Xevo G2 Quadrupole Time of Flight (Q-TOF). The system was comprised of a Binary Solvent Manager and a Sample Manager with Fixed-Loop (SM-FL). A Polaris C18A reverse phase column (2.0 x 100 mm, Agilent) was used (0.3 mL/min) with a 15% to 75% acetonitrile gradient in water

supplemented with 0.1% v/v formic acid before analysis in positive mode in the mass spectrometer. Deconvolution of the m/z spectra was done using the MaxENTI algorithm in the Masslynx v4.1 (SCN862) software. The percentage of ligation has been determined from the ratio between the different mass peaks in the deconvoluted spectra.

## **S1.5. Biochemical assays**

### **Ligation Experiment for the TR-FRET Coactivator Recruitment Assay – Dose Response**

Ligation was conducted using 20  $\mu$ M His6-ROR $\gamma$ t-LBD in buffer containing 50 mM TRIS (pH mentioned in Supporting Table 2), 50 mM NaCl, 5 mM CHAPS and 0.1% Bovine Serum Albumin (BSA). A mix of the probe (10 eq, 200  $\mu$ M at the maximum concentration) and His6-ROR $\gamma$ t-LBD (20  $\mu$ M) were titrated using a 1.4 x dilution series in Corning white low volume, low binding, 384-well plates at a final volume of 5.71  $\mu$ L. The final DMSO concentration was 1% v/v throughout. The plate was incubated at 4°C or RT overnight (shown in Supporting Table 2).

### **TR-FRET Coactivator Recruitment Assay - Dose-Response**

Assays were conducted using 100 nM *N*-terminal biotinylated SRC-1 box2 peptide (Biotin-N-PSSHSSLTARHKILHRLQLQEGSPSD-CONH<sub>2</sub>) and 100 nM His<sub>6</sub>-ROR $\gamma$ t-LBD in buffer containing 10 mM HEPES (pH 7.5), 150 mM NaCl, 5 mM DTT, 0.1% BSA (w/v) and 0.1 mM CHAPS. The highest concentration of probe compound was 1  $\mu$ M (10 eq). A terbium labelled anti-His antibody (CisBio Bioassays, 61HISTLA) and D2-labelled streptavidin (CisBio Bioassays, 610SADLA) were used at the concentrations recommended by the supplier. Corning white low volume, low binding, 384-well plates at a final volume of 10  $\mu$ L were used. The final DMSO concentration was 1% v/v throughout. The plate was incubated at room temperature for 60 min and centrifuged before reading (excitation = 340 nm; emission = 665 nm and 620 nm) on a Tecan

infinite F500 plate reader using the parameters recommended by CisBio Bioassays. The data were analyzed with GraphPad Prism 7.0 Software. The dose-response curve was fitted represented by:

$$y = A_1 + \frac{A_2 - A_1}{1 + \frac{x^p}{x_0^p}} \quad (\text{eq. 1})$$

Where y is the FRET ratio ((acceptor/donor)\*1000),  $A_1$  is the bottom asymptote,  $A_2$  is the top asymptote, p is the Hill slope, x is the ligand concentration in  $\mu\text{M}$  and  $x_0$  is the  $\text{IC}_{50}$  value in  $\mu\text{M}$ . Where dose-response curves did not reach a bottom asymptote, this was fixed at the value of the negative control. The data was normalized with regards to plateau levels (positive and negative control values). The data was recorded in triplicate in two or more independent experiments (one representative dataset shown). Error bars represent the SD of the mean.

#### **Ligation Experiment for the TR-FRET Coactivator Recruitment Assay – Ligand Binding**

Ligation was conducted using 20  $\mu\text{M}$  His6-ROR $\gamma$ t-LBD in buffer containing 50 mM TRIS (pH mentioned in Supporting Table 2), 50 mM NaCl, 5 mM CHAPS and 0.1% Bovine Serum Albumin (BSA). A mix of the probe (5 eq, 100  $\mu\text{M}$ ) and His6-ROR $\gamma$ t-LBD (20  $\mu\text{M}$ ) was incubated (continuous mixing) at 4°C or RT (shown in Supporting Table 2) overnight, in a total volume of 50  $\mu\text{L}$ . The mixture was rebuffed to TR-FRET assay buffer (10 mM HEPES, 150 mM NaCl) using a PD Spin Trap G-25 column and excess compound was removed.

#### **TR-FRET Coactivator Recruitment Assay - Ligand Binding**

Assays were conducted using 100 nM N-terminal biotinylated SRC-1 box2 peptide (Biotin-NPSSHSSLTARHKILHRLQLQEGSPSD-CONH2) and 20 nM His6-ROR $\gamma$ t-LBD (unligated & ligated) in buffer containing 10 mM HEPES, 150 mM NaCl, 5 mM DTT, 0.1% BSA (w/v) and 0.1 mM CHAPS, pH 7.5. A terbium labelled anti-His antibody (CisBio Bioassays, 61HISTLA) and D2-labelled streptavidin (CisBio Bioassays, 610SADLA) were used at the concentrations recommended by the supplier. Compounds (dissolved in DMSO) were titrated using a 2 x dilution

series in Corning white low volume, low binding, 384-well plates at a final volume of 10  $\mu$ L. The final DMSO concentration was 2% v/v throughout. The plate was directly measured (excitation = 340 nm; emission = 665 nm and 620 nm) on a Tecan infinite F500 plate reader using the parameters recommended by CisBio Bioassays. The gain was set manually to 141 and 163 for Tb and d2, respectively. Data analysis was performed in an analogous fashion to that described above. The data was recorded in triplicate in two or more independent experiments (one representative dataset shown). Error bars represent the SD of the mean.

### **Thermal Shift Assay**

Thermal shift assays were performed using 40  $\mu$ L samples containing 5  $\mu$ M ROR $\gamma$ t-LBD, 10  $\mu$ M compound and 2.5x SYPRO<sup>®</sup> Orange (Sigma) in buffer containing 150 mM NaCl, 10 mM HEPES (pH 7.5) and 1% DMSO. Hard-Shell<sup>®</sup> 96-Well PCR Plates (low profile, thin wall, skirted, green/white #hsp9645) were used. The samples were heated from 25  $^{\circ}$ C to 80  $^{\circ}$ C at a rate of 0.5  $^{\circ}$ C per 5 s in a CFX96 Touch Real-Time PCR Detection System (Bio-Rad). After each increment, Sypro Orange intensity was measured using the plate read option in Bio-Rad CFX Manager 3.1. Melting curves and negative derivatives were plotted from the HEX filter using GraphPad Prism 7.0. Melting temperatures were determined by the Bio-Rad CFX Manager 3.1 software in negative mode. The data was recorded in triplicate in three independent experiments (one representative dataset shown). Error bars represent the SD of the mean.

## S2.0. Additional information on the design, ligation data and TR-FRET experiments

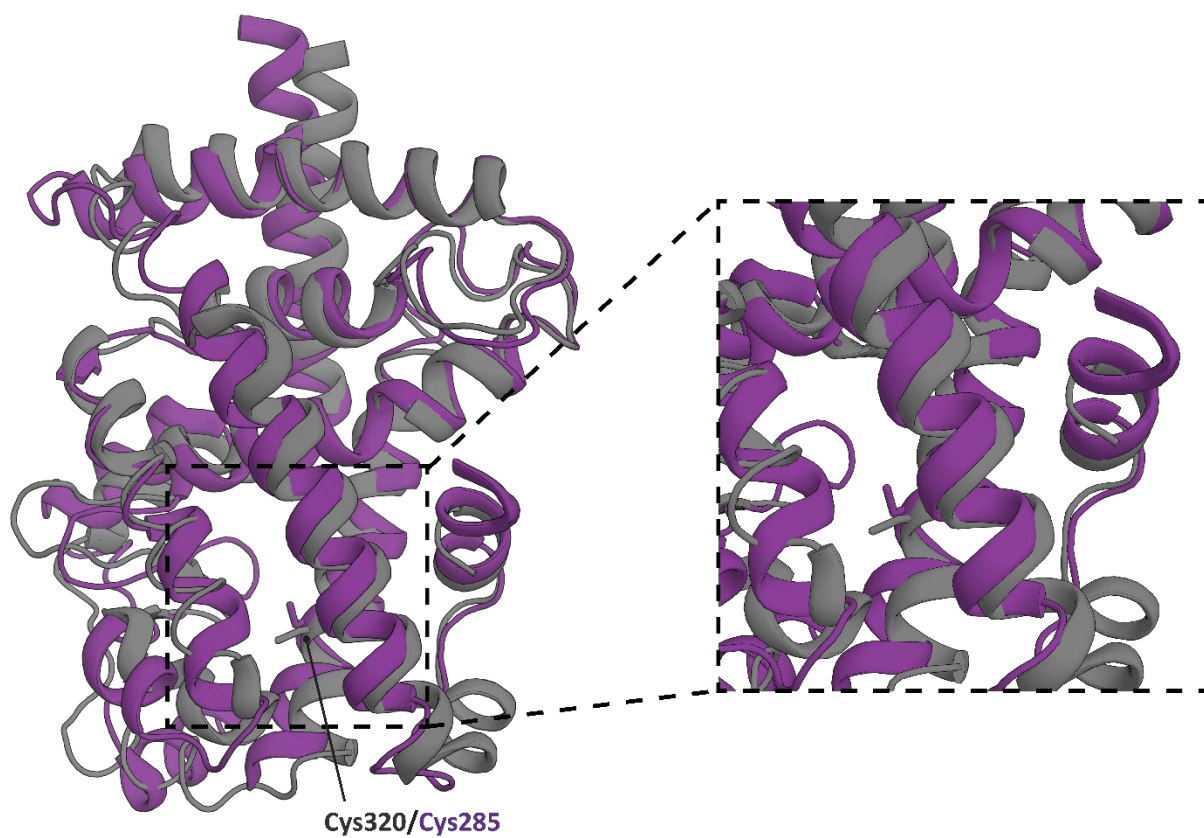

**Figure S1.** Overlay of the crystal structures of ROR $\gamma$ t (grey, PDB: 3L0L) and PPAR $\gamma$  (purple, PDB: 3B0R), demonstrating the similar positioning of the cysteine residue Cys320/Cys285.

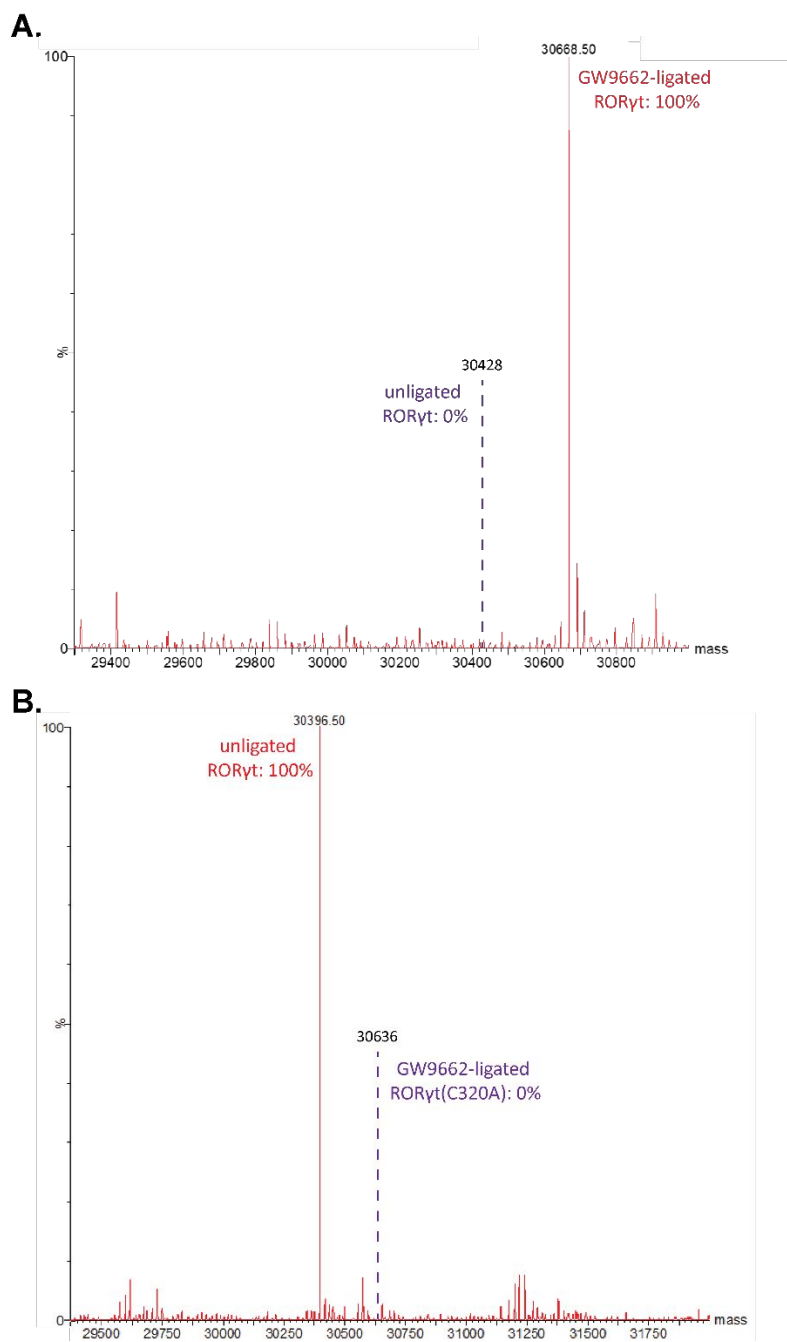

**Figure S2. A.** Deconvoluted Q-TOF spectrum of ROR $\gamma$ t (residues 265-507) ligated to **GW9662**: 100% ligation is observed (mass: 30688.5 Da), while 0% unligated protein is visible (mass: 30428 Da). **B.** Deconvoluted Q-TOF spectrum of ROR $\gamma$ t containing a Cys320Ala mutation (265-507), ligated to **GW9662**: 0% ligation is observed (mass: 30636 Da), while 100% unligated protein is visible (mass: 30396.5 Da).

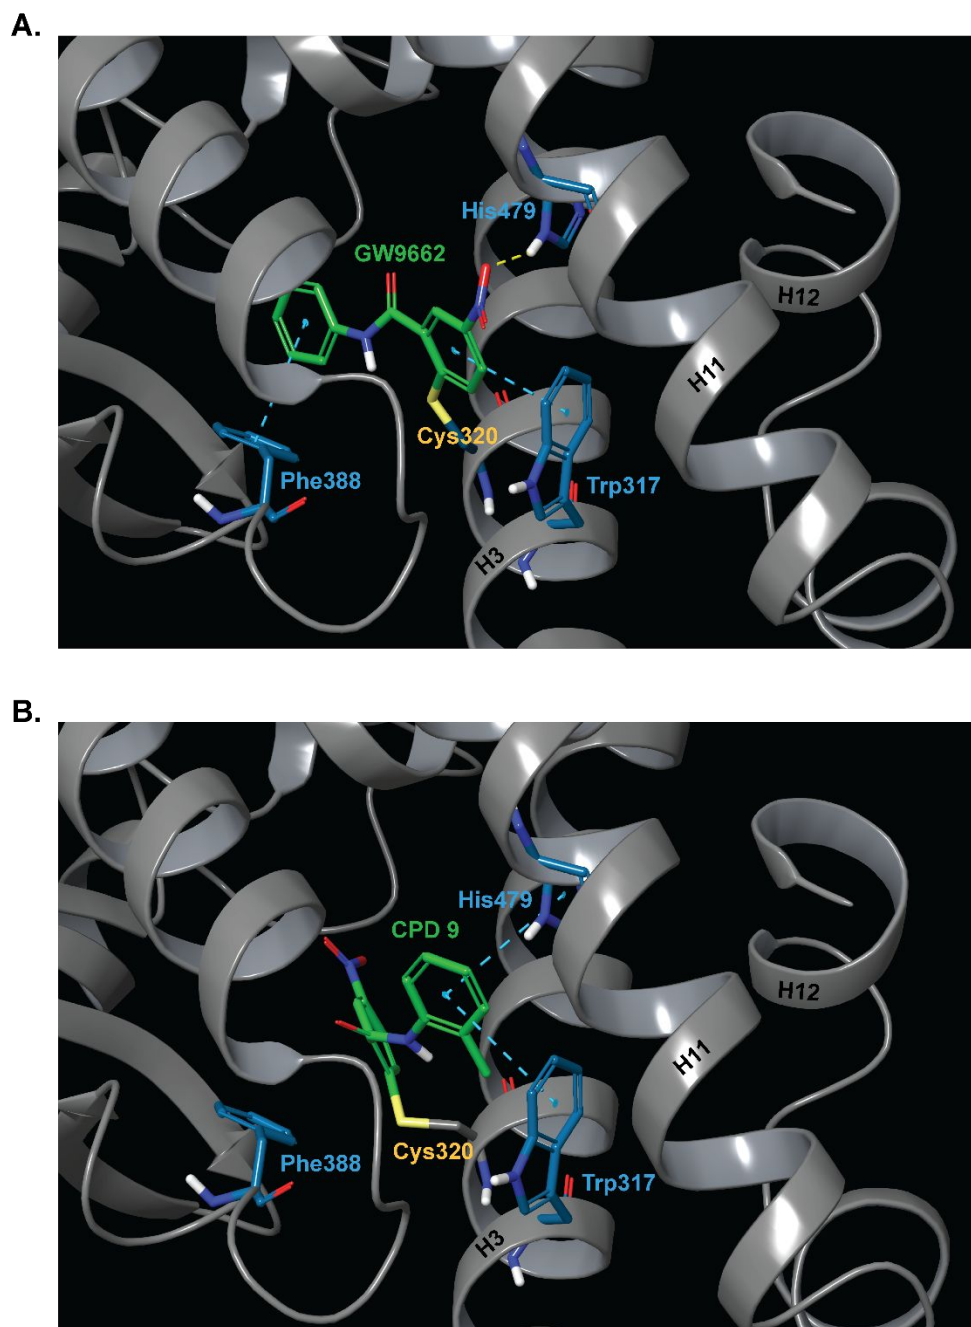

**Figure S3.** Docking poses of **GW9662** and compound **9** in ROR $\gamma$ t (PDB: 3L0L). **A.** Docking pose for **GW9662** (green sticks) (best docking score), making pi-pi interactions (blue dots lines) with residues Trp317 and Phe388. The warhead is positioned towards H11. **B.** Docking pose for compound **9** (green sticks) (best docking score), making pi-pi interactions (blue dotted lines) with residues Trp317 and His479. The warhead is positioned into the orthosteric pocket.

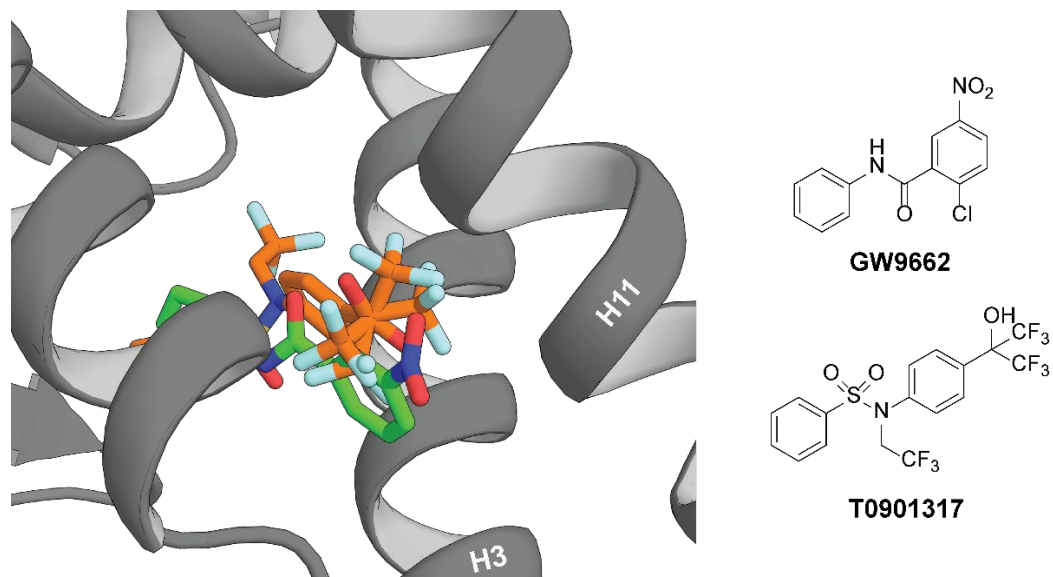

**Figure S4.** Overlay of the co-crystal structure of ROR $\gamma$ t with inverse agonist **T0901317** (orange sticks) (PDB: 4NB6) and docking pose of **GW9662** (orange) (best docking score). The nitro moiety of **GW9662** points towards H11, similar to the CF<sub>3</sub>-groups of **T0901317**.



### A. Compound 15-ligated protein

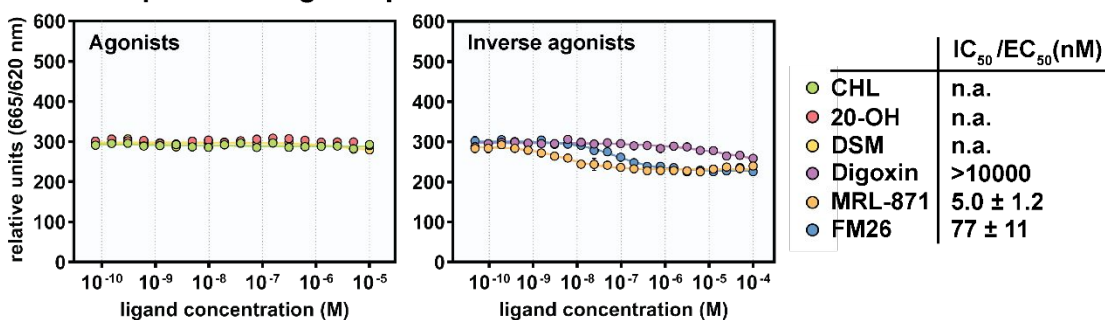

### B. Compound 18-ligated protein

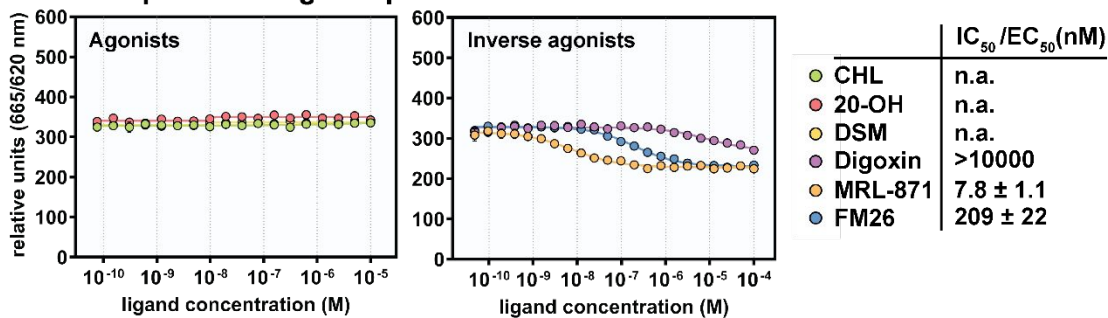

**Figure S5.** TR-FRET coactivator recruitment ligand binding assay with ligated ROR $\gamma$ t by titration of various orthosteric and allosteric ligands (Cholesterol (CHL), 20 $\alpha$ -hydroxycholesterol (20-OH), desmosterol (DSM), digoxin, **MRL-871** and **FM26**). Ligand binding assay for **A.** Compound **15**-ligated protein. **B.** Compound **18**-ligated protein. Abbreviations: n.a., not active. Data recorded in triplicate from two independent experiments (one representative dataset shown). Error bars represent the SD of the mean.

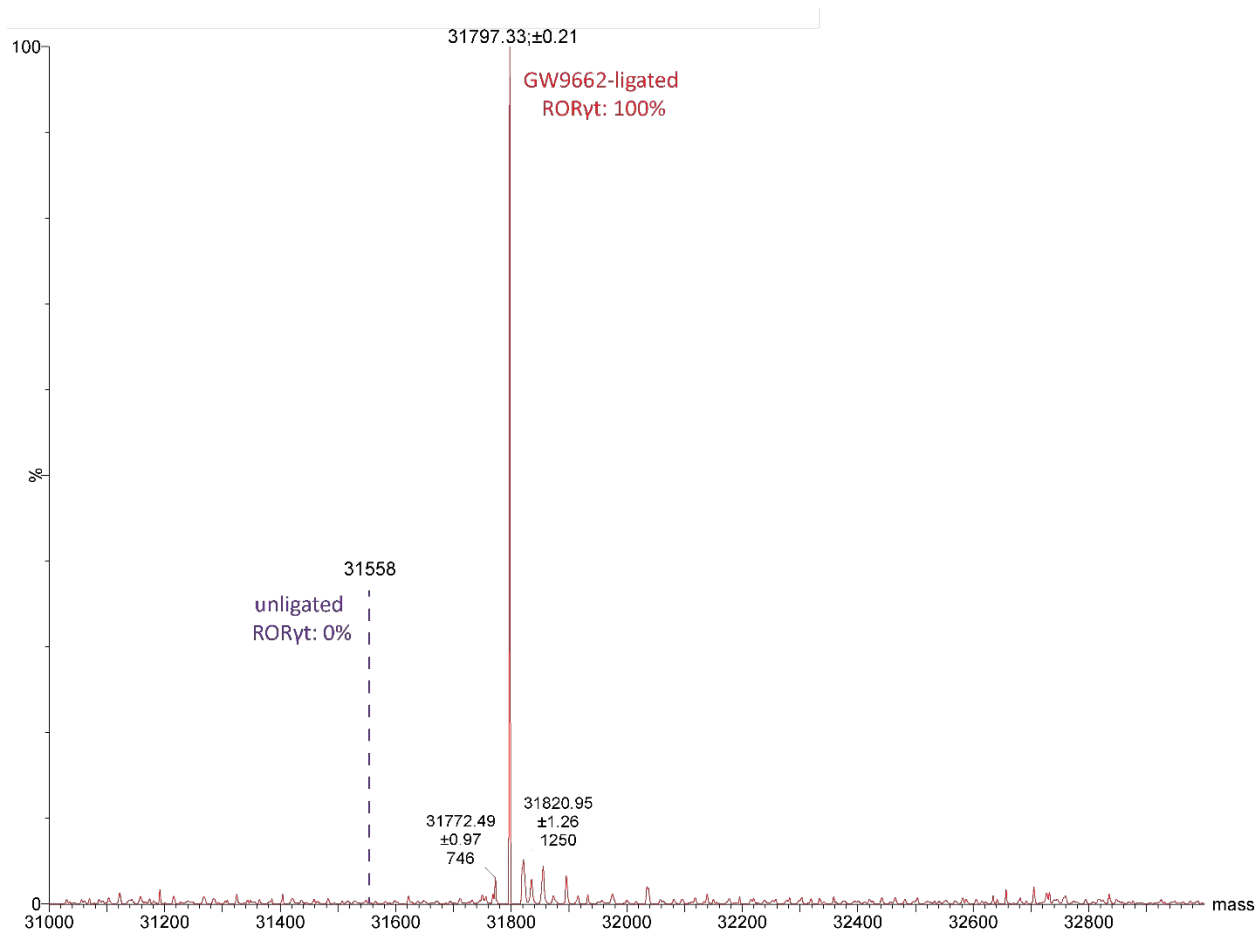

**Figure S6.** Deconvoluted Q-TOF spectrum of ROR $\gamma$ t ligated to **GW9662**: 100% ligation is observed, while 0% unligated protein is visible (mass: 31558.11 Da). Mass expected: 31797.68 Da, mass observed: 31796.33 Da.

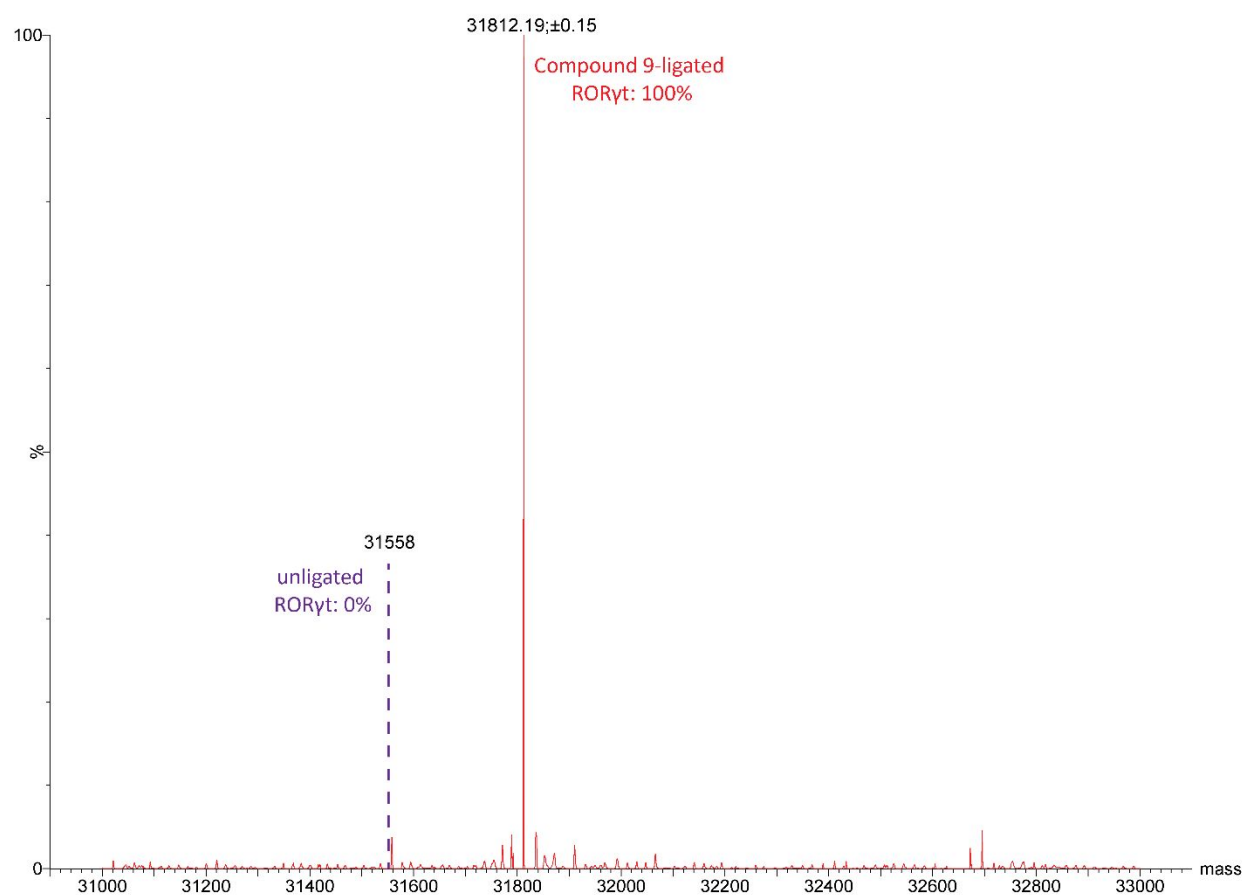

**Figure S7.** Deconvoluted Q-TOF spectrum of ROR $\gamma$ t ligated to compound **9**: 100% ligation is observed, while 0% unligated protein is visible (mass: 31558.11 Da). Mass expected: 31811.70 Da, mass observed: 31812.19 Da.

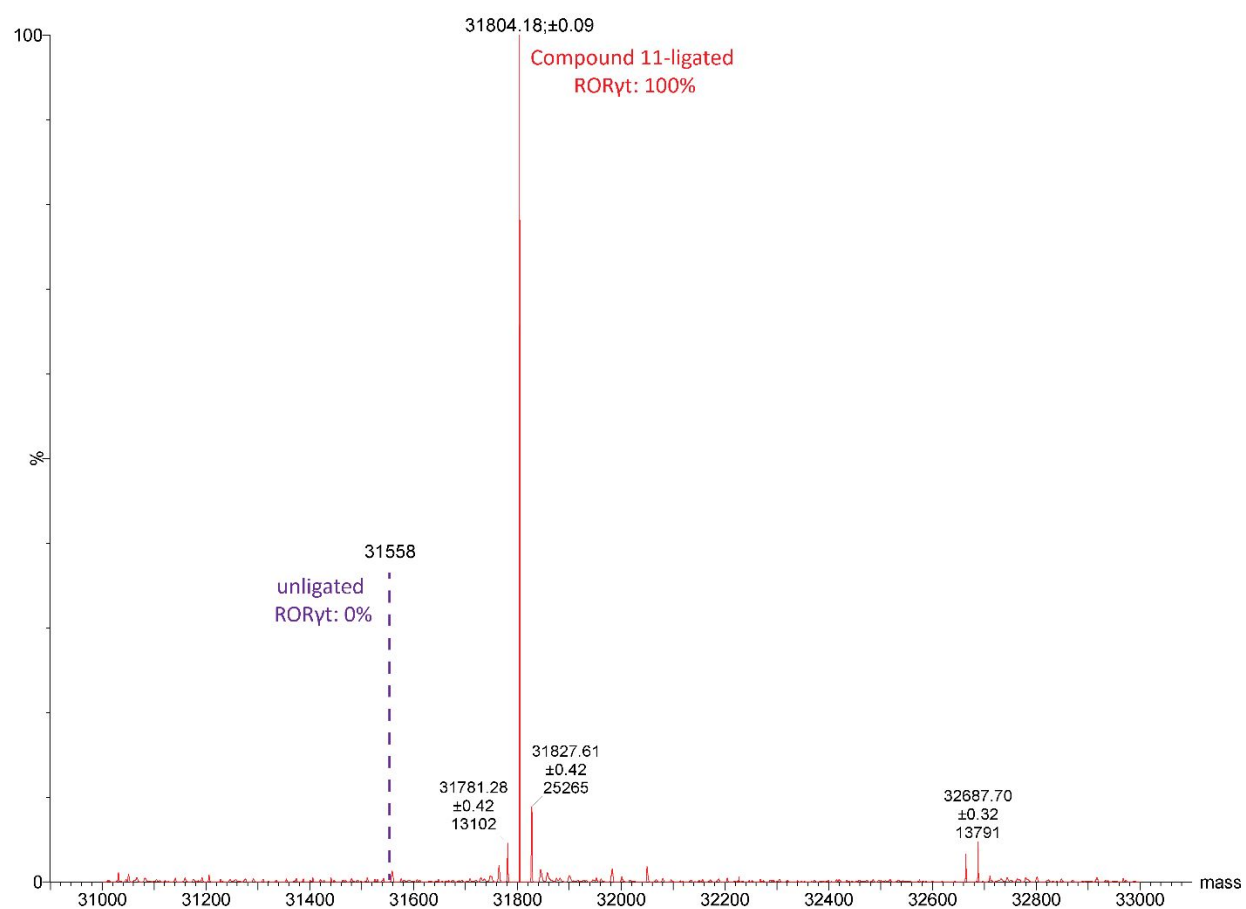

**Figure S8.** Deconvoluted Q-TOF spectrum of ROR $\gamma$ t ligated to compound **11**: 100% ligation is observed, while 0% unligated protein is visible (mass: 31558.11 Da). Mass expected: 31804.35 Da, mass observed: 31804.18 Da.

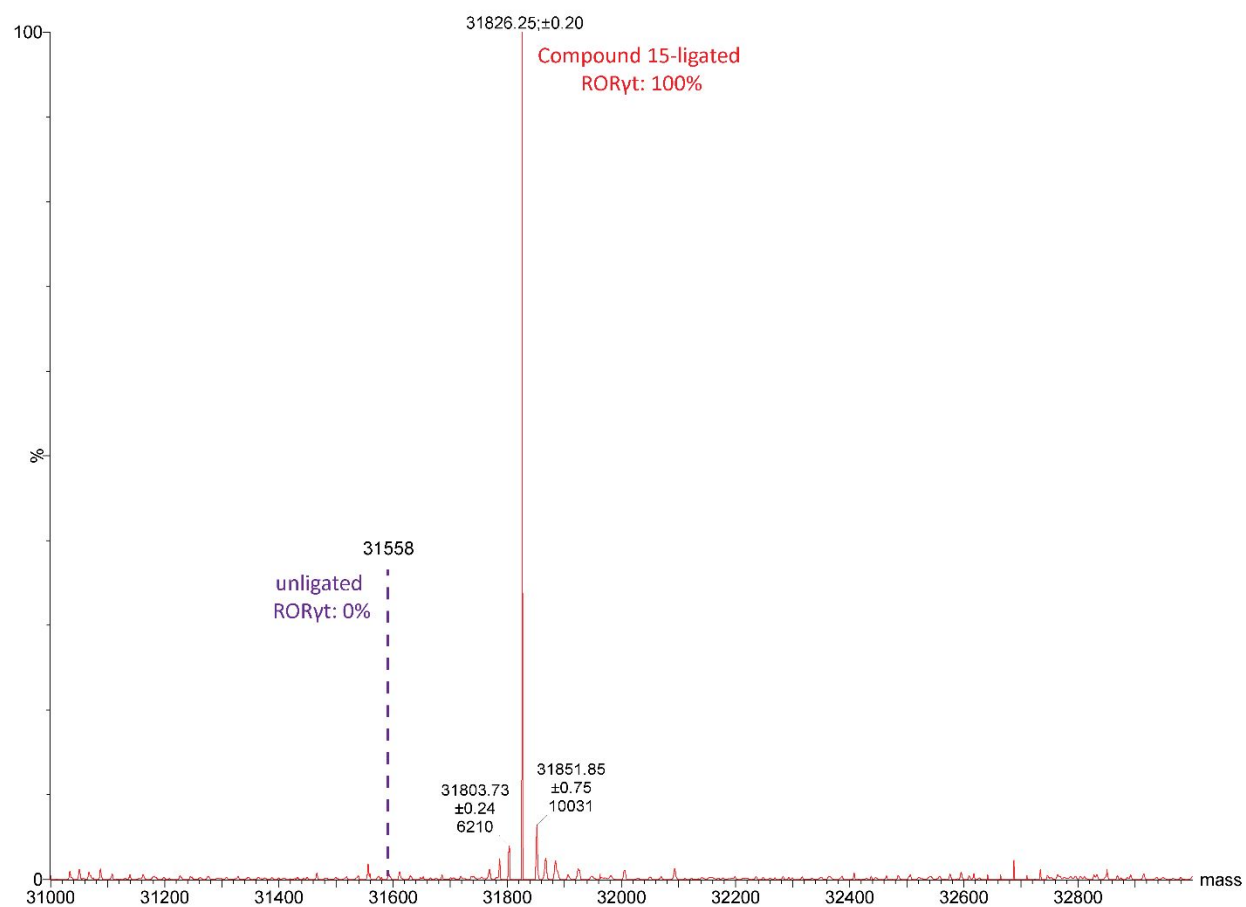

**Figure S9.** Deconvoluted Q-TOF spectrum of ROR $\gamma$ t ligated to compound **15**: 100% ligation is observed, while 0% unligated protein is visible (mass: 31558.11 Da). Mass expected: 31826.38 Da, mass observed: 31826.25 Da.

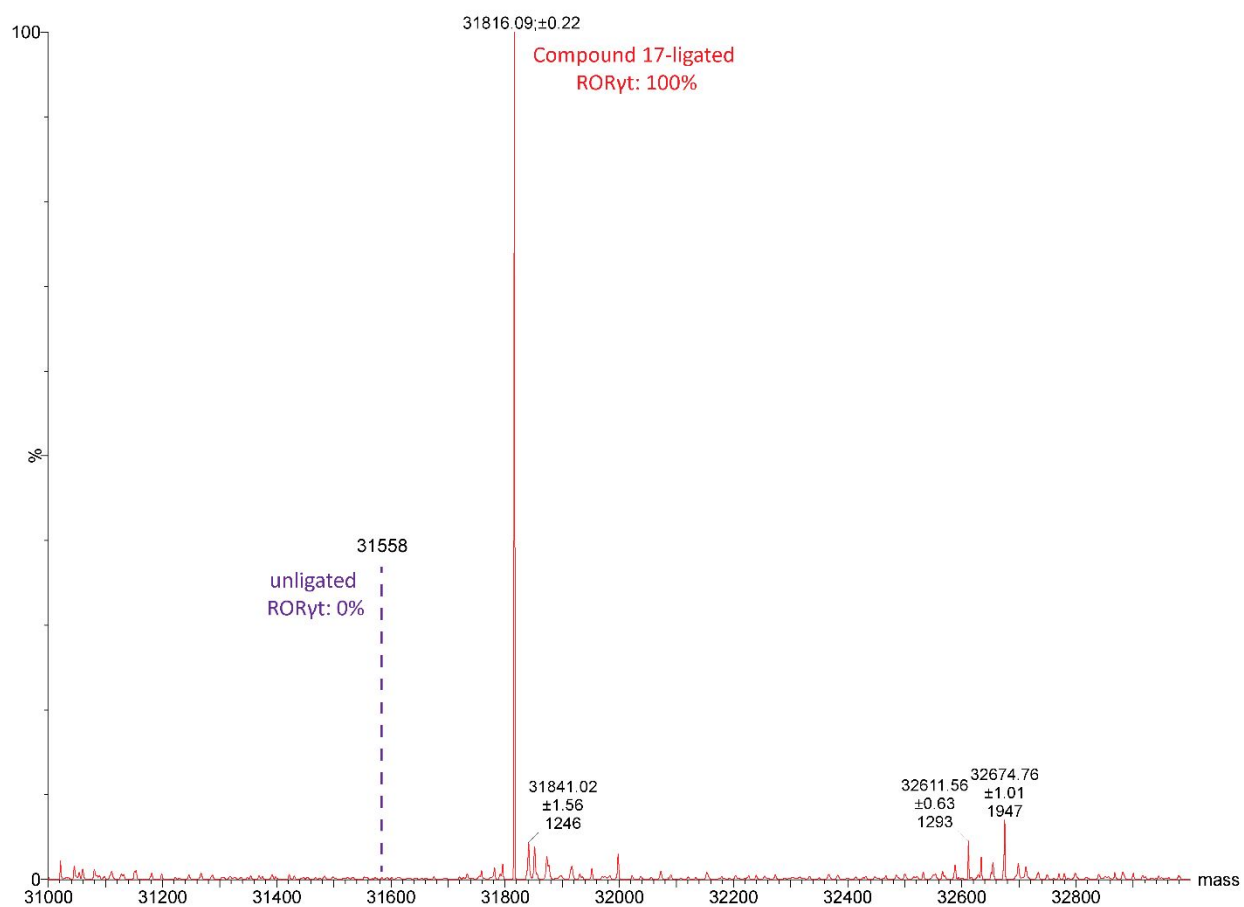

**Figure S10.** Deconvoluted Q-TOF spectrum of ROR $\gamma$ t ligated to compound **17**: 100% ligation is observed, while 0% unligated protein is visible (mass: 31558.11 Da). Mass expected: 31816.32 Da, mass observed: 31816.09 Da.

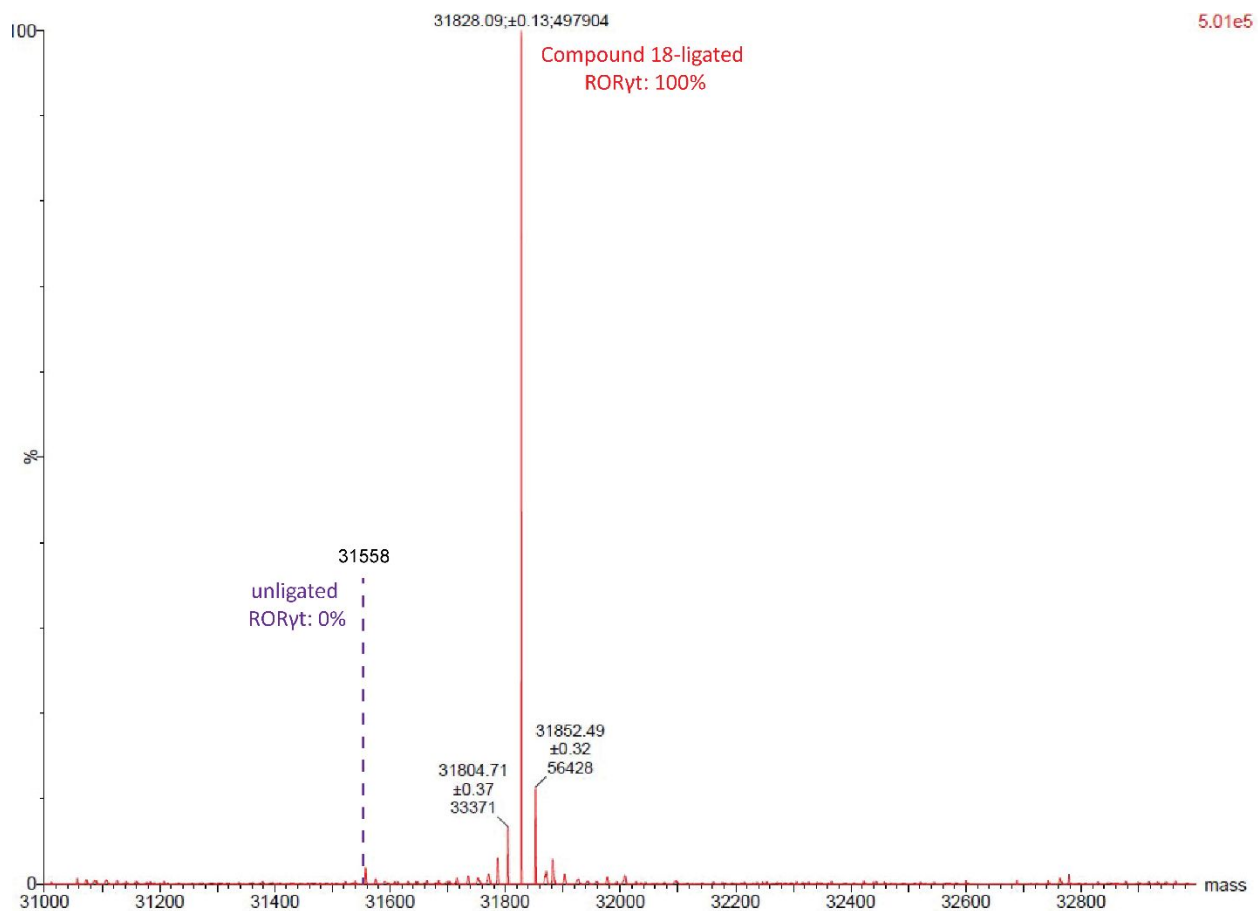

**Figure S11.** Deconvoluted Q-TOF spectrum of ROR $\gamma$ t ligated to compound **18**: 100% ligation is observed, while 0% unligated protein is visible (mass: 31558.11 Da). Mass expected: 31828.35 Da, mass observed: 31828.09 Da.

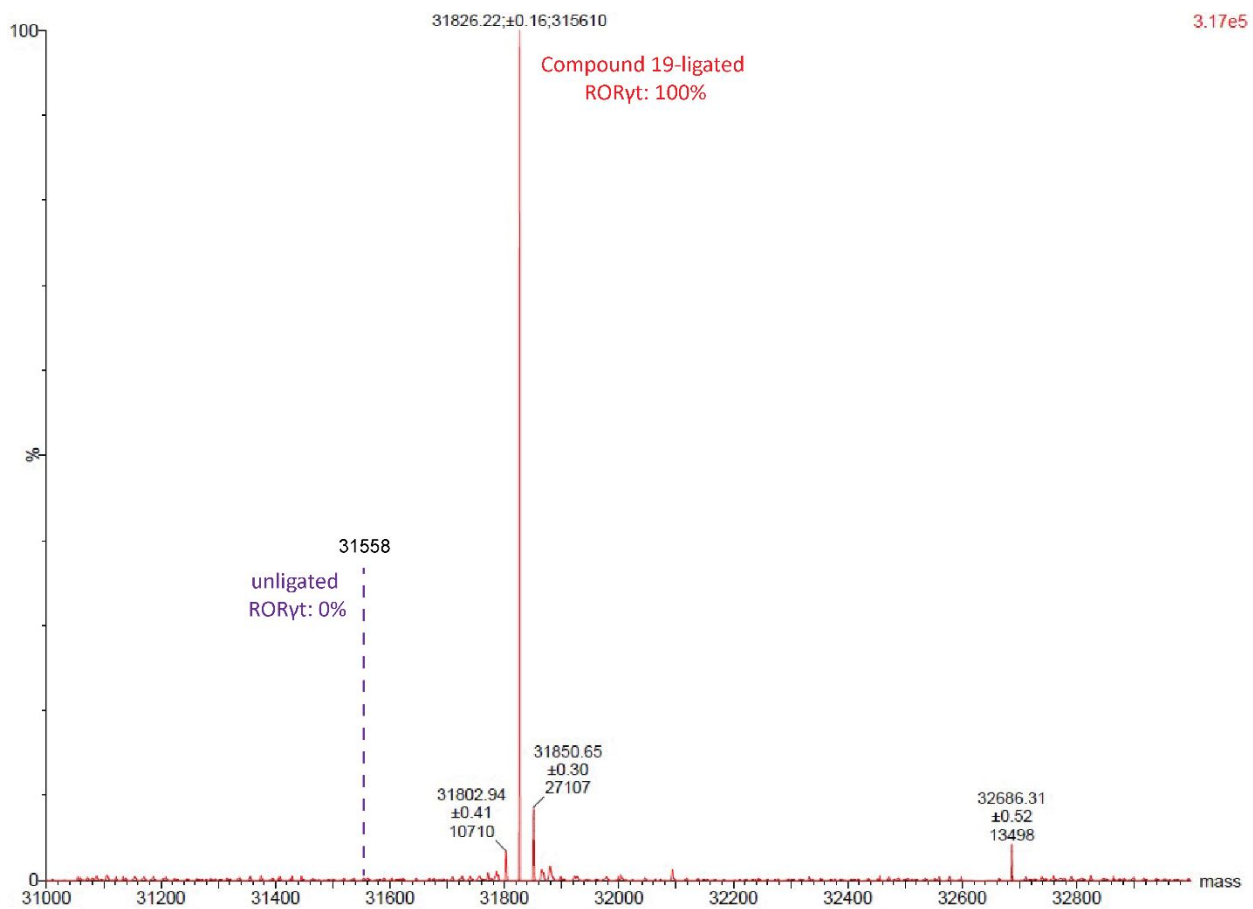

**Figure S12.** Deconvoluted Q-TOF spectrum of RORyt ligated to compound **19**: 100% ligation is observed, while 0% unligated protein is visible (mass: 31558.11 Da). Mass expected: 31826.38 Da, mass observed: 31826.22 Da.



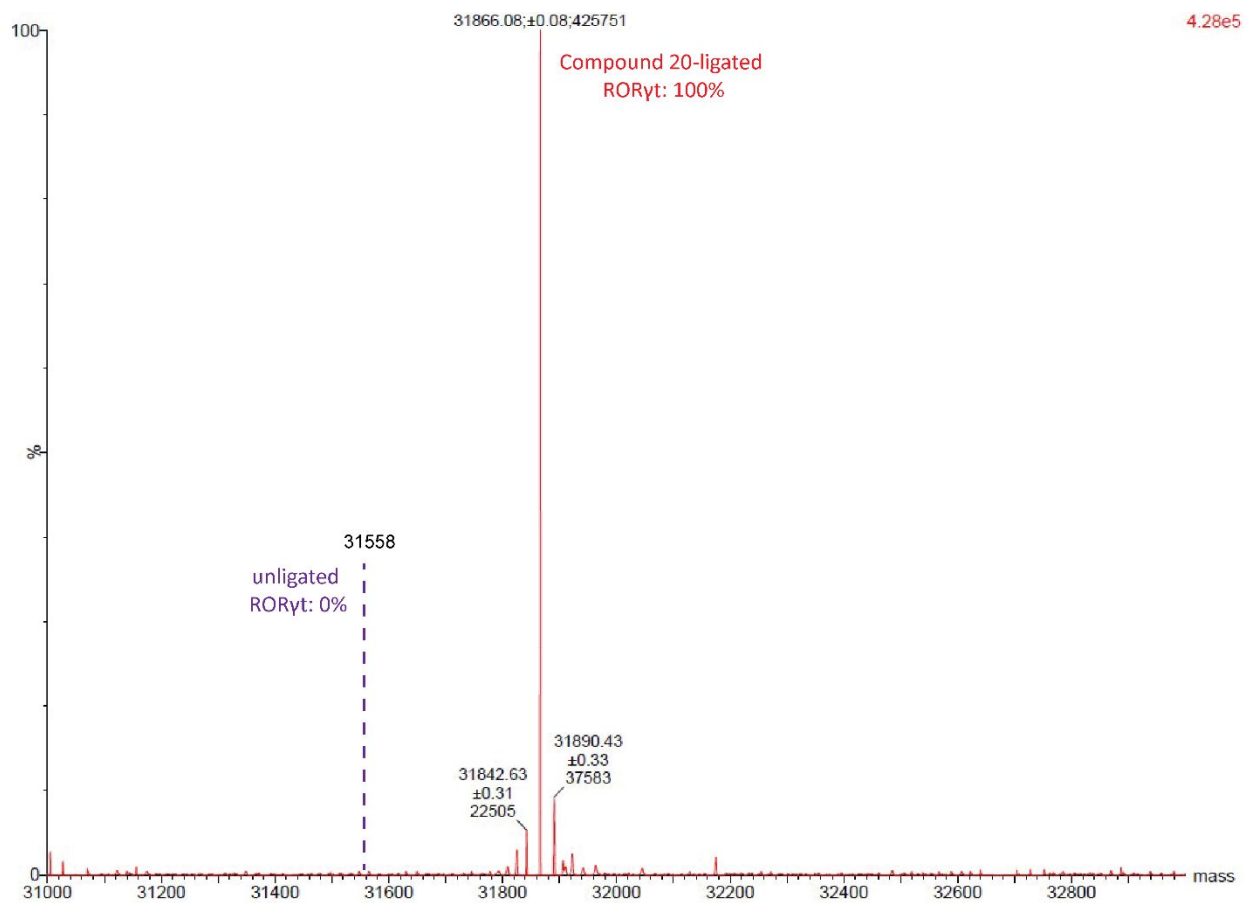

**Figure S13.** Deconvoluted Q-TOF spectrum of ROR $\gamma$ t ligated to compound **20**: 100% ligation is observed, while 0% unligated protein is visible (mass: 31558.11 Da). Mass expected: 31866.32 Da, mass observed: 31866.08 Da.

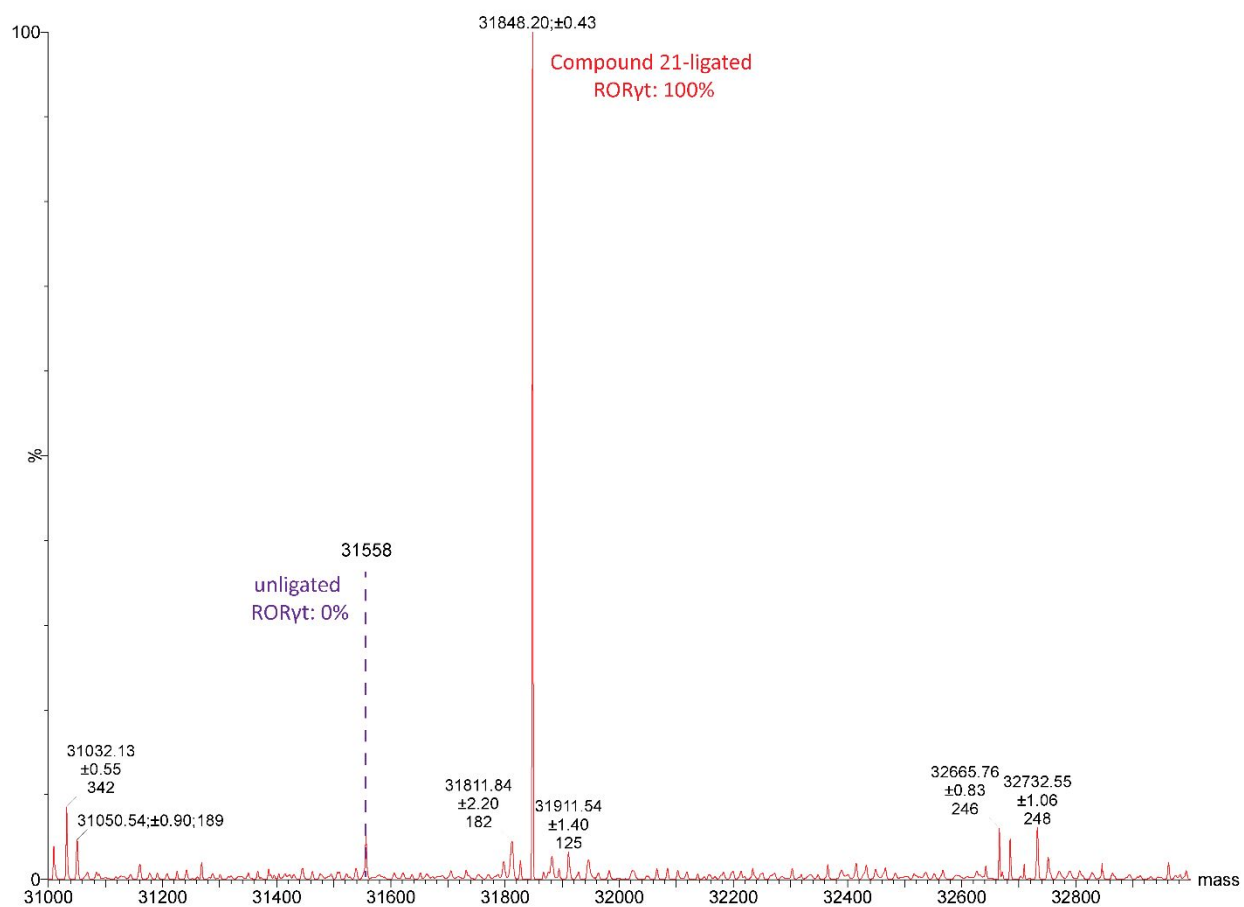

**Figure S14.** Deconvoluted Q-TOF spectrum of ROR $\gamma$ t ligated to compound **21**: 100% ligation is observed, while 0% unligated protein is visible (mass: 31558.11 Da). Mass expected: 31848.39 Da, mass observed: 31848.20 Da.

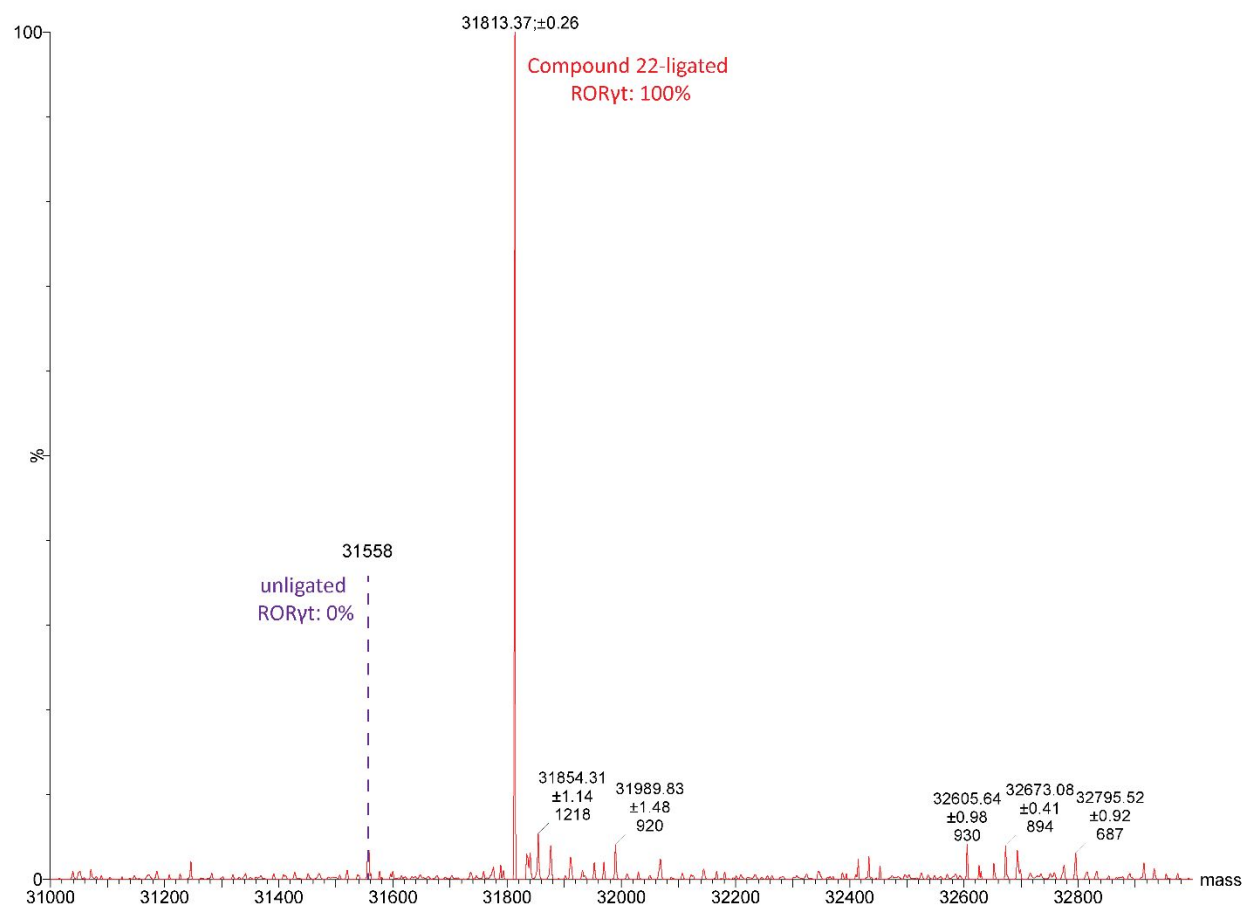

**Figure S15.** Deconvoluted Q-TOF spectrum of ROR $\gamma$ t ligated to compound **22**: 100% ligation is observed, while 0% unligated protein is visible (mass: 31558.11 Da). Mass expected: 31813.34 Da, mass observed: 31813.37 Da.

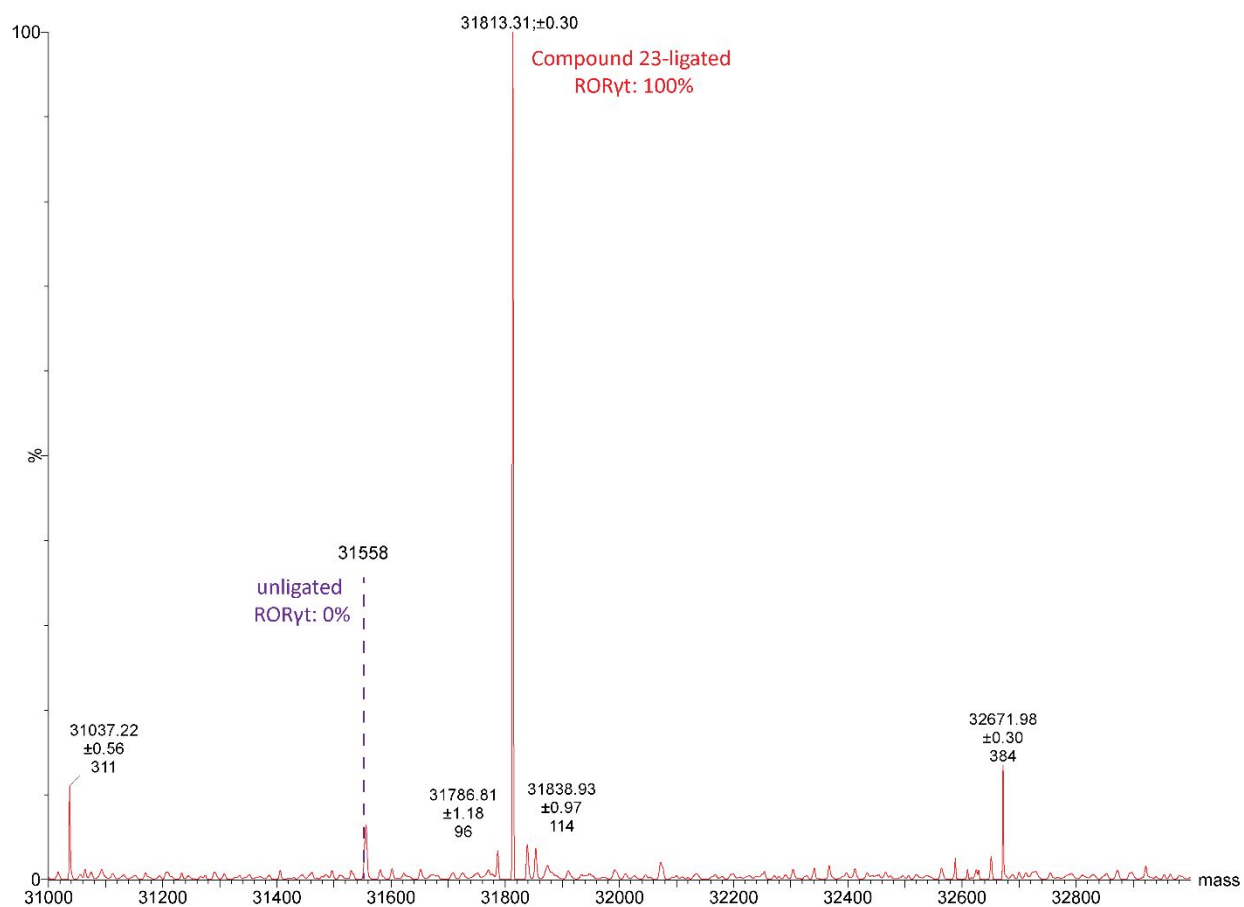

**Figure S16.** Deconvoluted Q-TOF spectrum of ROR $\gamma$ t ligated to compound **23**: 100% ligation is observed, while 0% unligated protein is visible (mass: 31558.11 Da). Mass expected: 31814.33 Da, mass observed: 31813.31 Da.

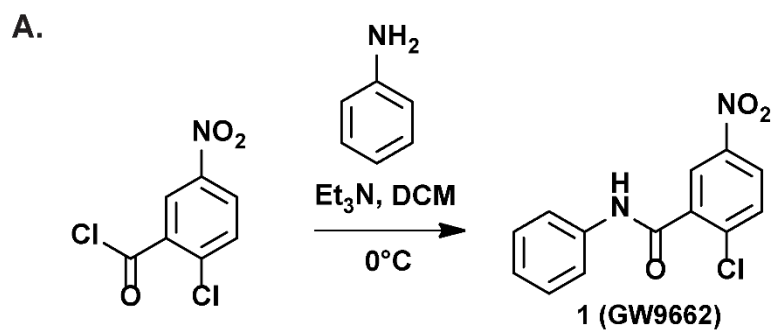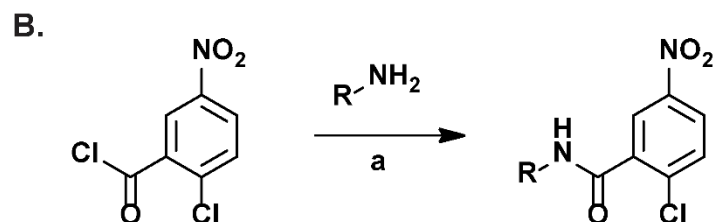

**Scheme S1. A.** Synthesis route to obtain compound **GW9662** via an amide coupling reaction. **B.**

General synthesis route for all compounds.<sup>a</sup>

<sup>a</sup> Reagents and conditions: (a) amine, triethylamine, DCM, 0°C, 18h, or: pyridine, 0°C, 18h, or: DMA, RT, 18h, or: Et<sub>3</sub>N, DMAP, DCM, RT, 18h, or: THF, RT, 3h. The reaction conditions for each compound are specified in the experimental section.

**Table S1.** Optimal ligation conditions for all compounds.

| <b>Compound</b>                                                             | <b>Ligation conditions</b> |
|-----------------------------------------------------------------------------|----------------------------|
| <b>1 (GW9662), 11, 15, 16 &amp; 17</b>                                      | pH=5.8, 5 eq, 4°C          |
| <b>2 (SB1404), 3, 4, 5, 6, 7, 8, 9, 10, 12, 13, 14, 18, 19, 20 &amp; 23</b> | pH=5.8, 5 eq, RT           |
| <b>21</b>                                                                   | pH=5.8, 10 eq, 4°C         |
| <b>22</b>                                                                   | pH=5.3, 10 eq, RT          |

### S3.0. NMR spectra (<sup>1</sup>H & <sup>13</sup>C) and LC-UV/TIC traces for assayed compounds

#### Compound 1 (GW9662)

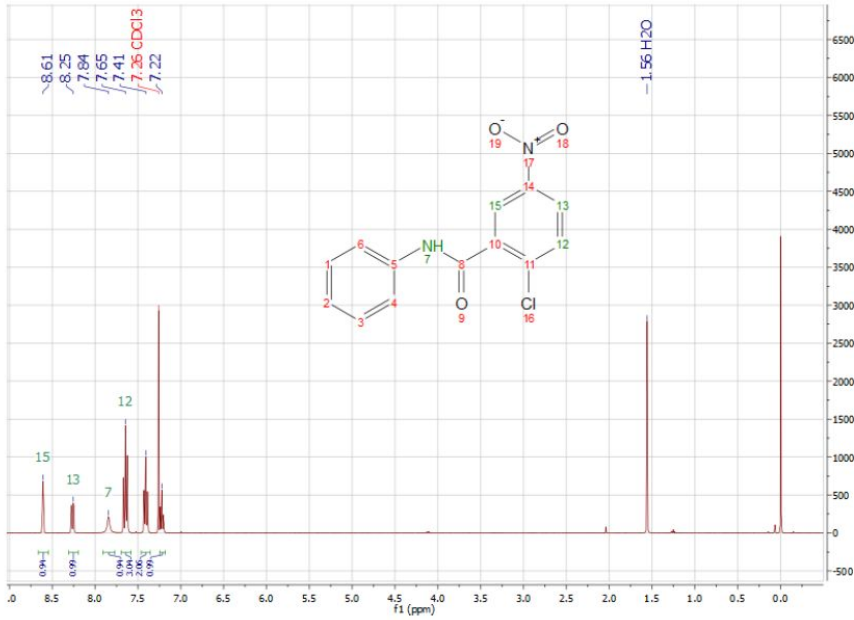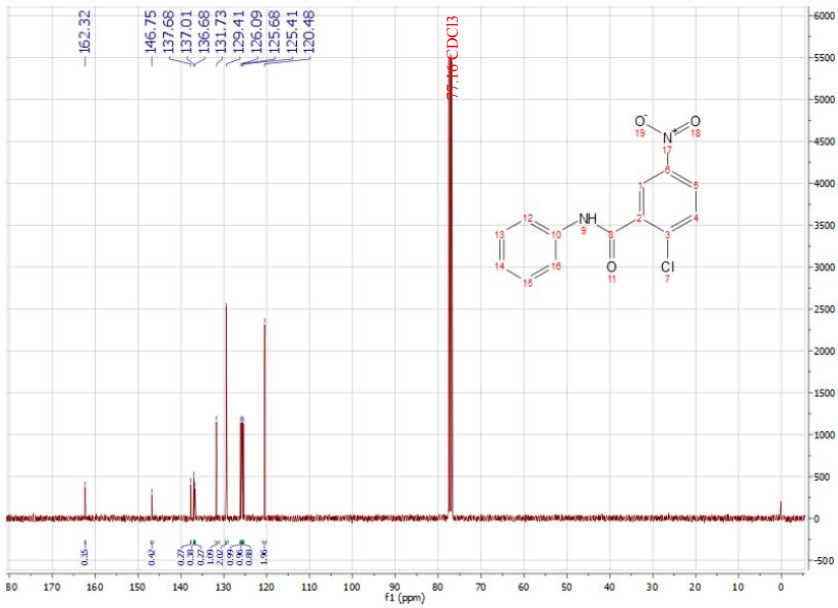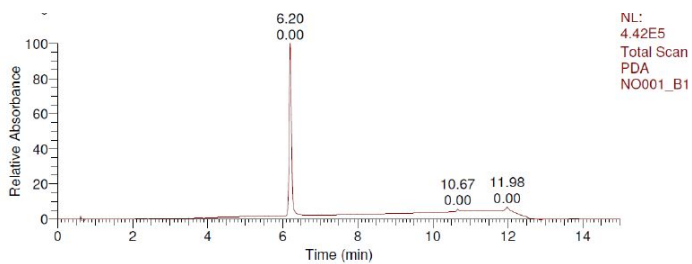

# Compound 2 (SB1404)

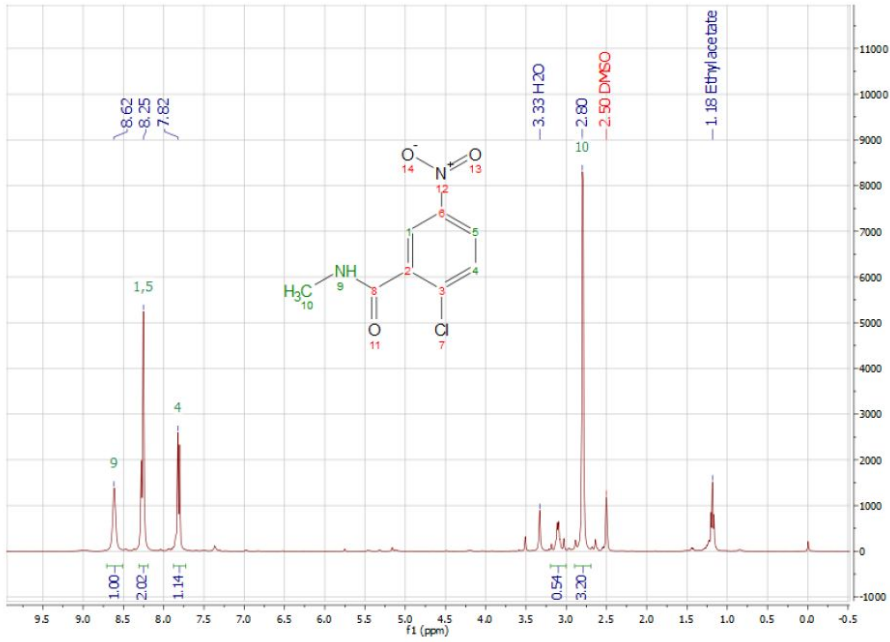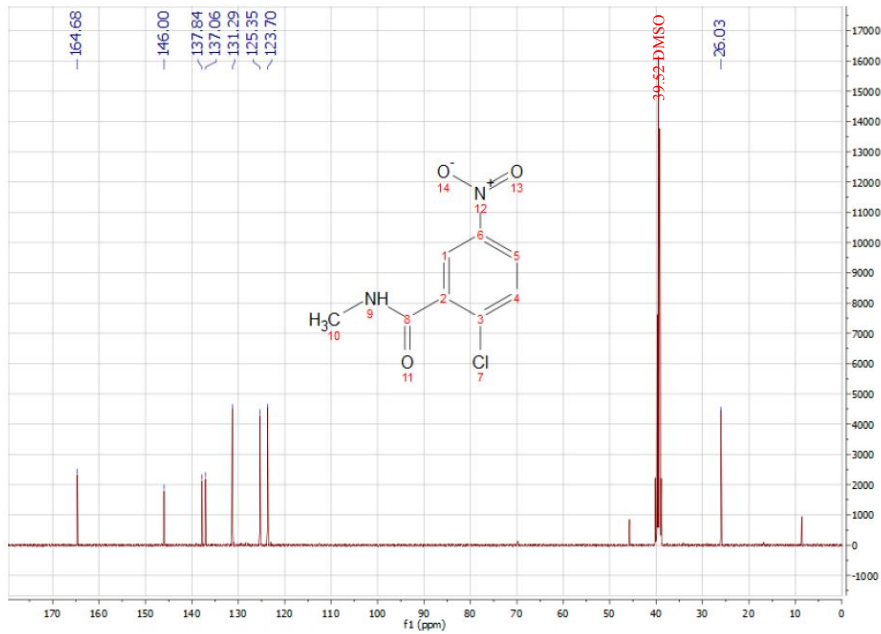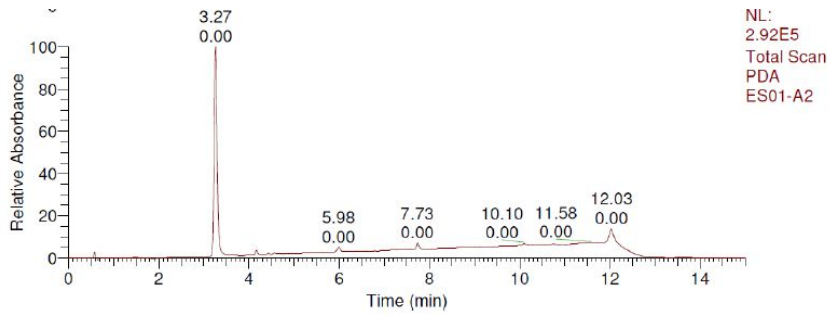



# Compound 3

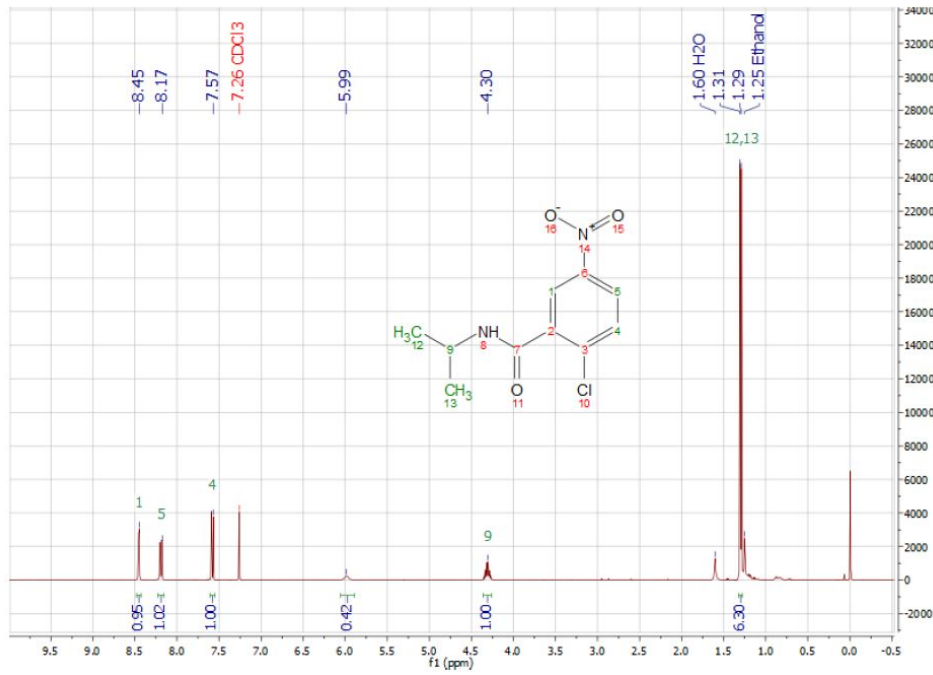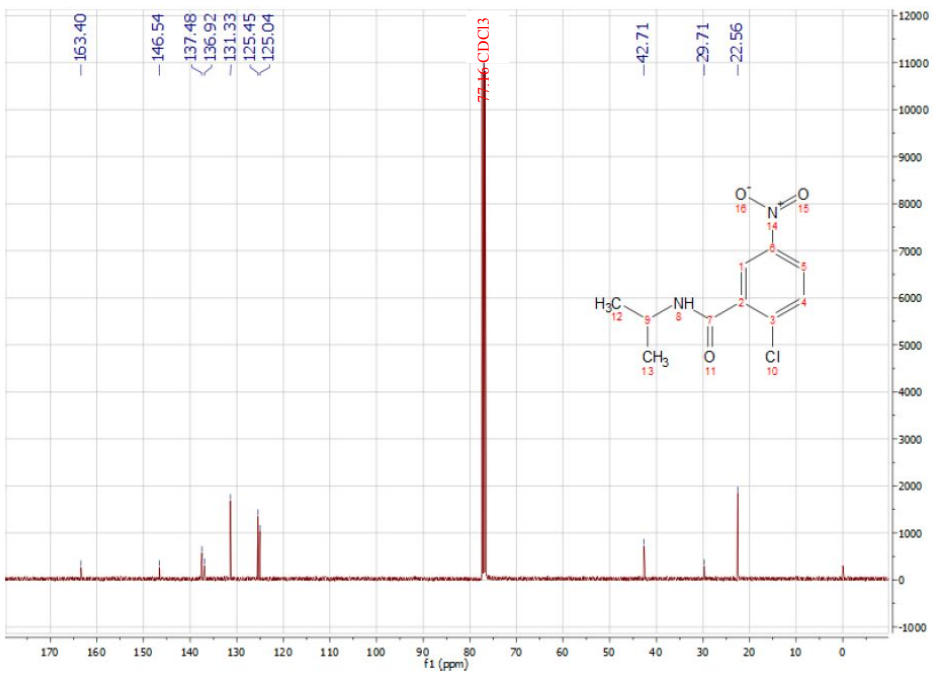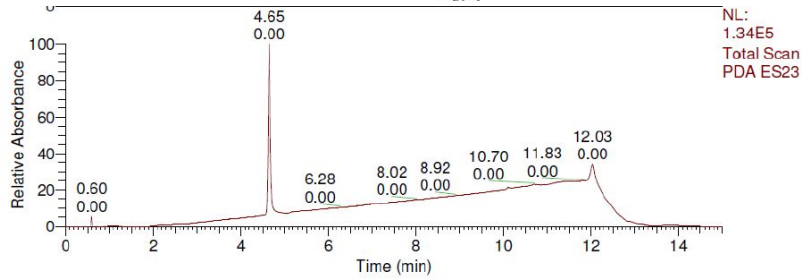

# Compound 4

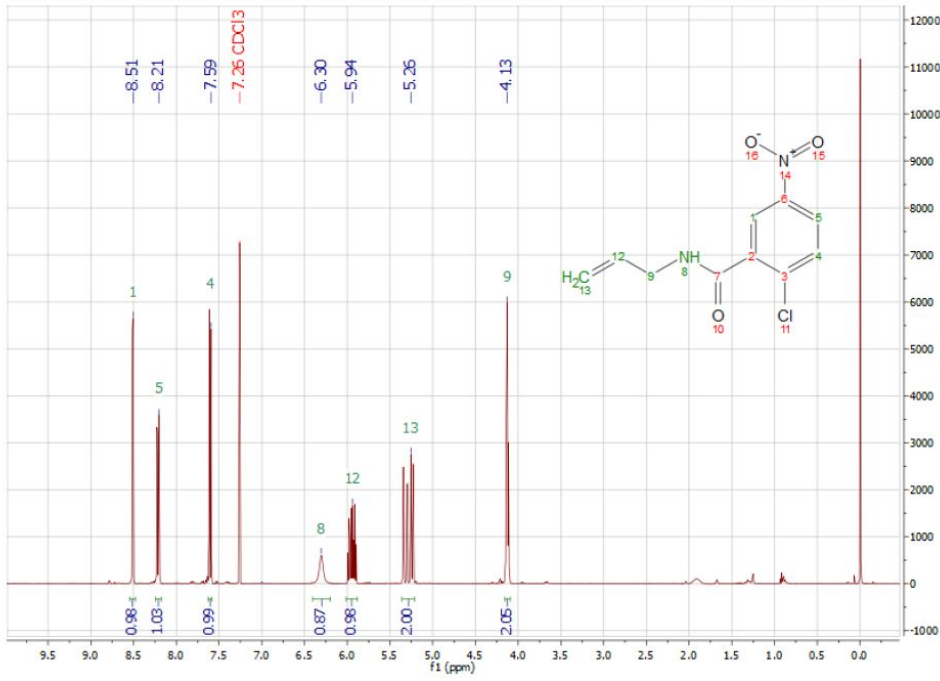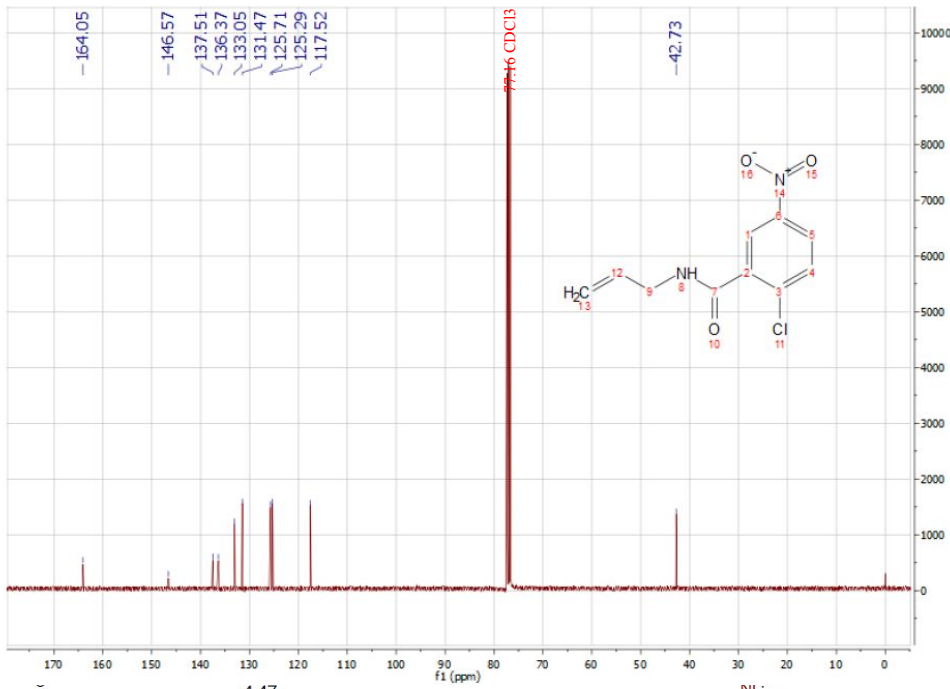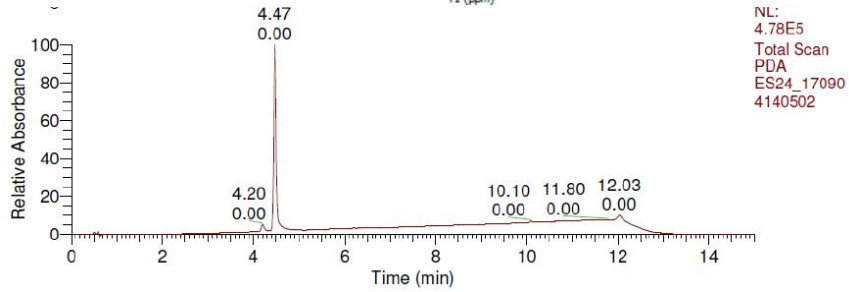

# Compound 5

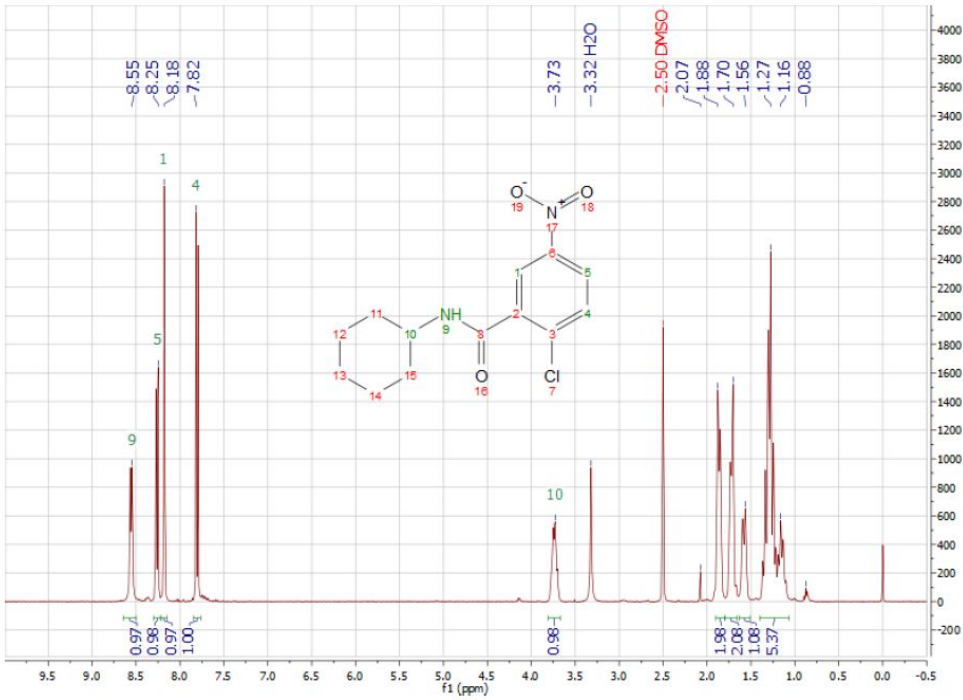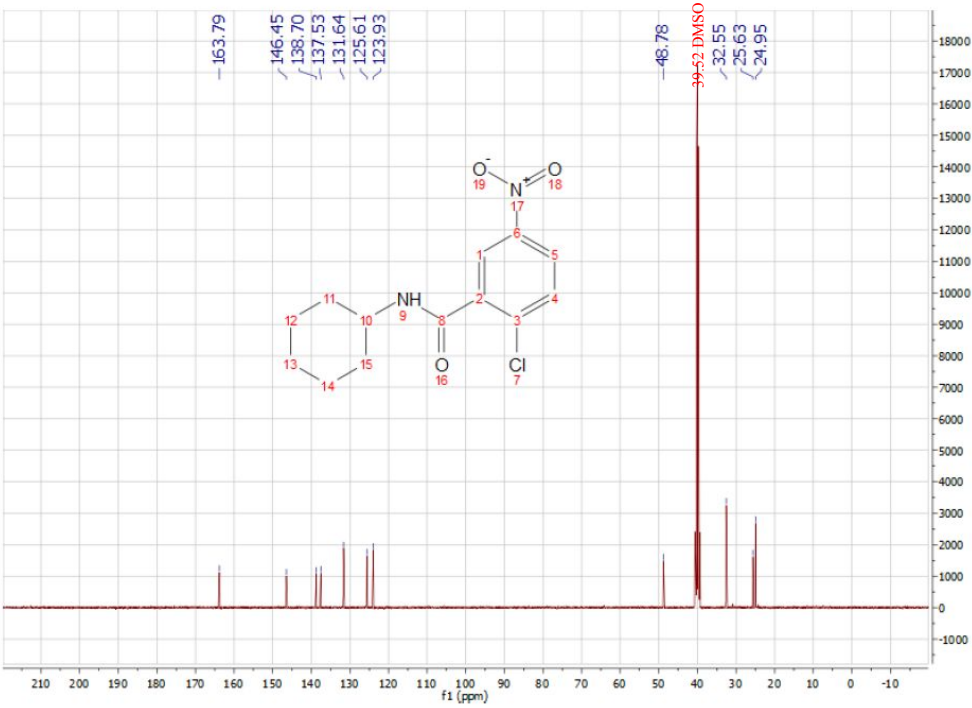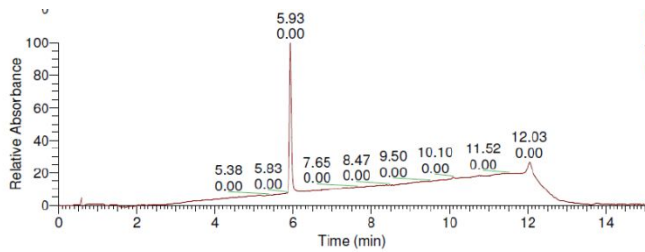

# Compound 6

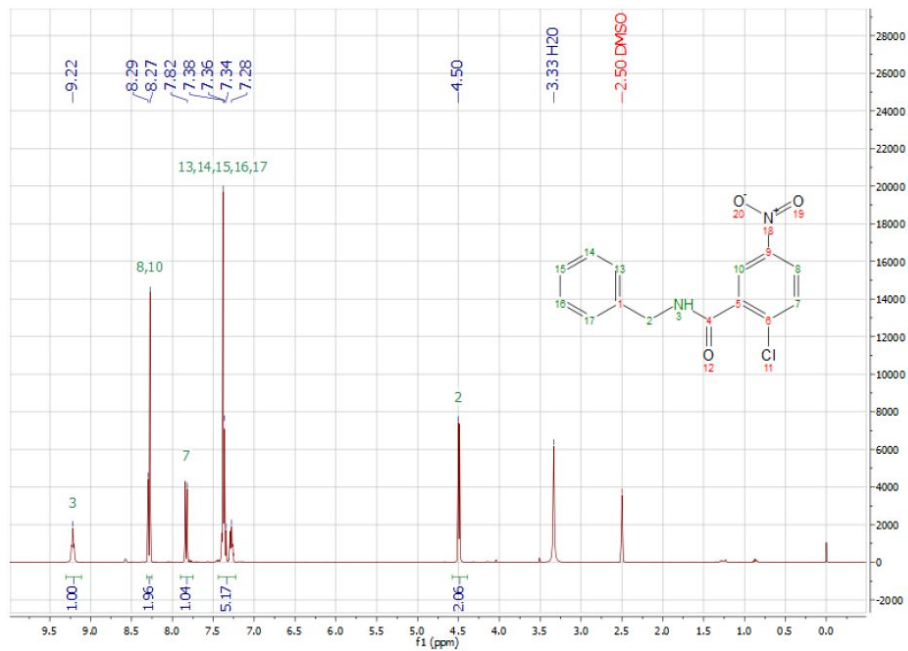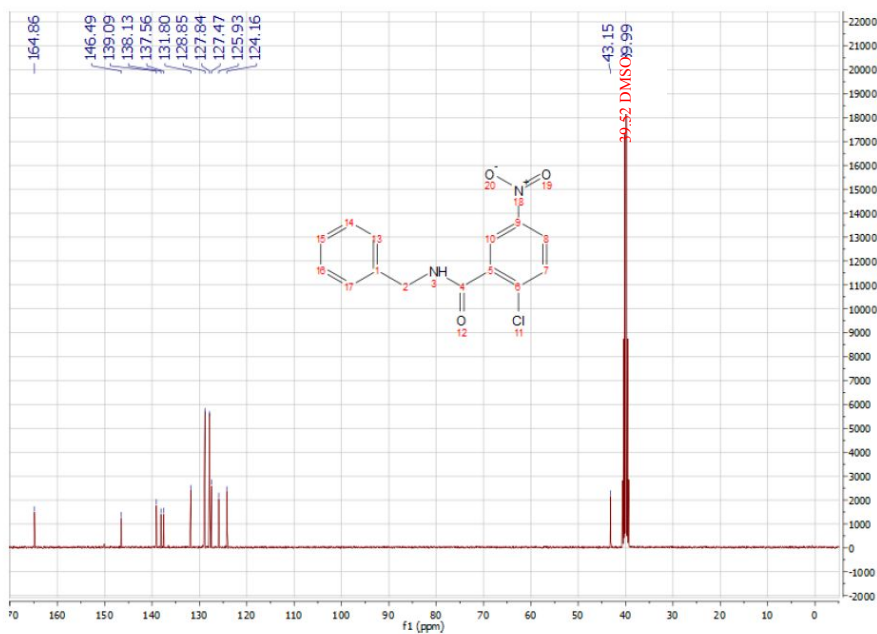

Figure A.20: <sup>13</sup>C NMR of ES27.

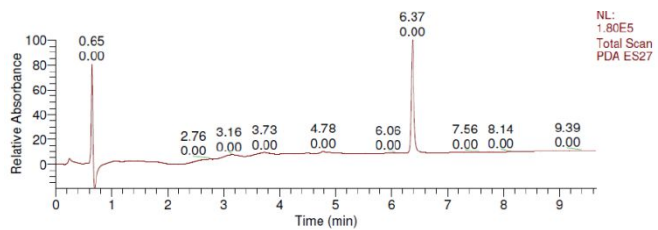

# Compound 7

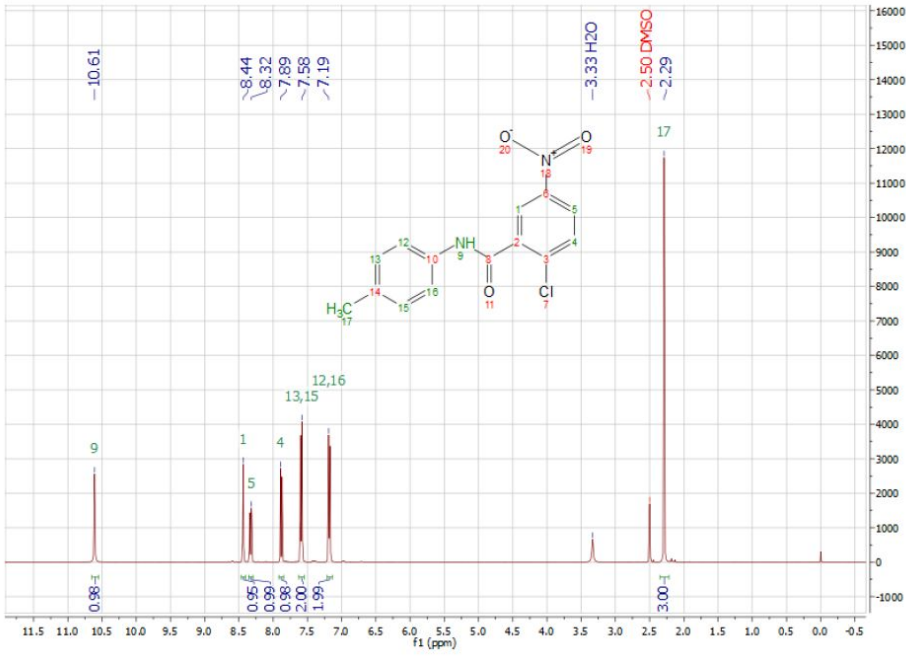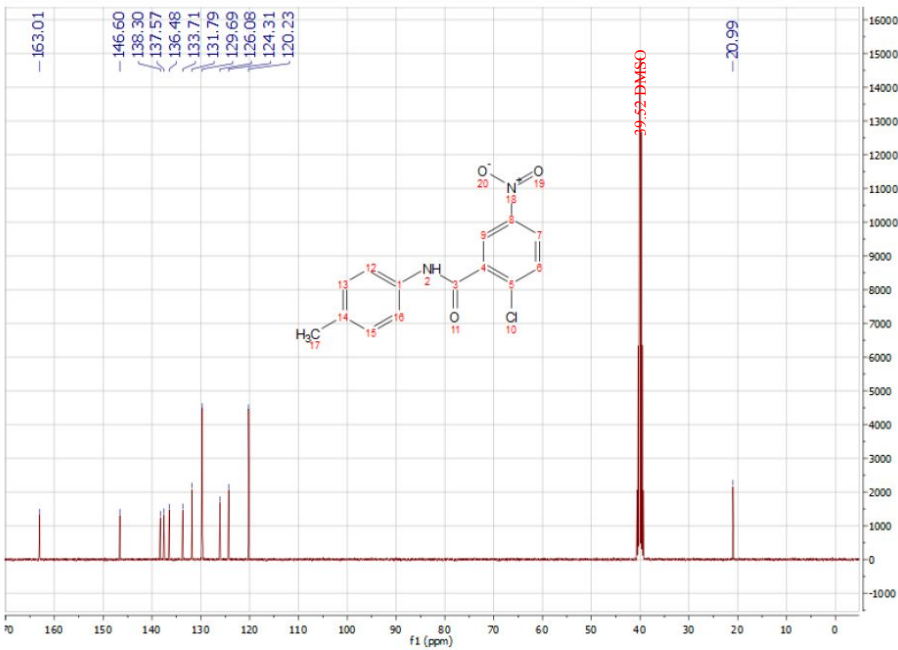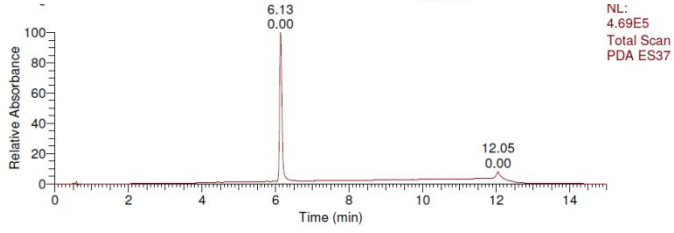

# Compound 8

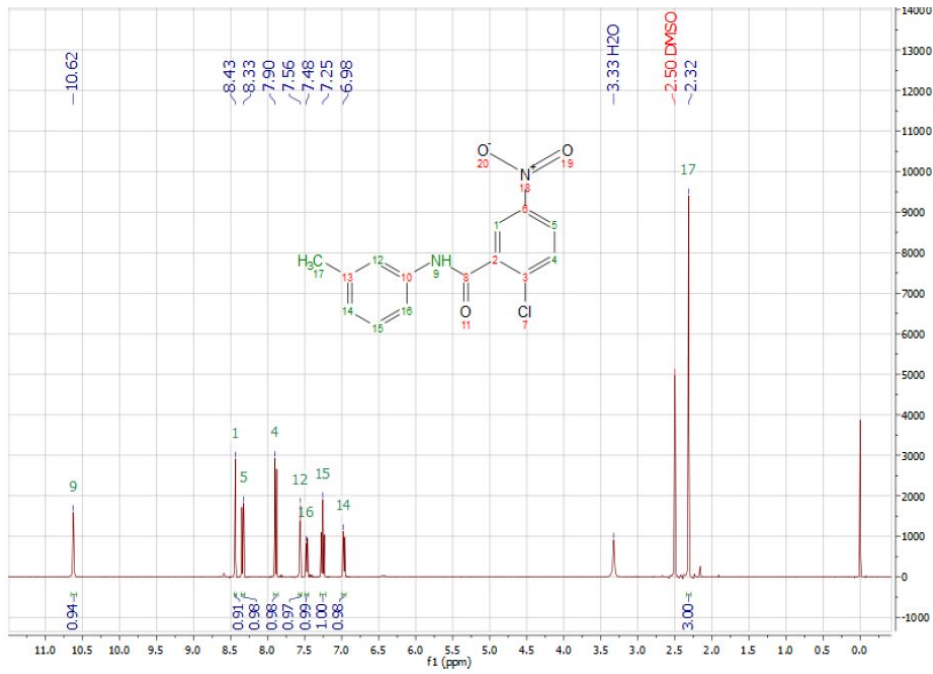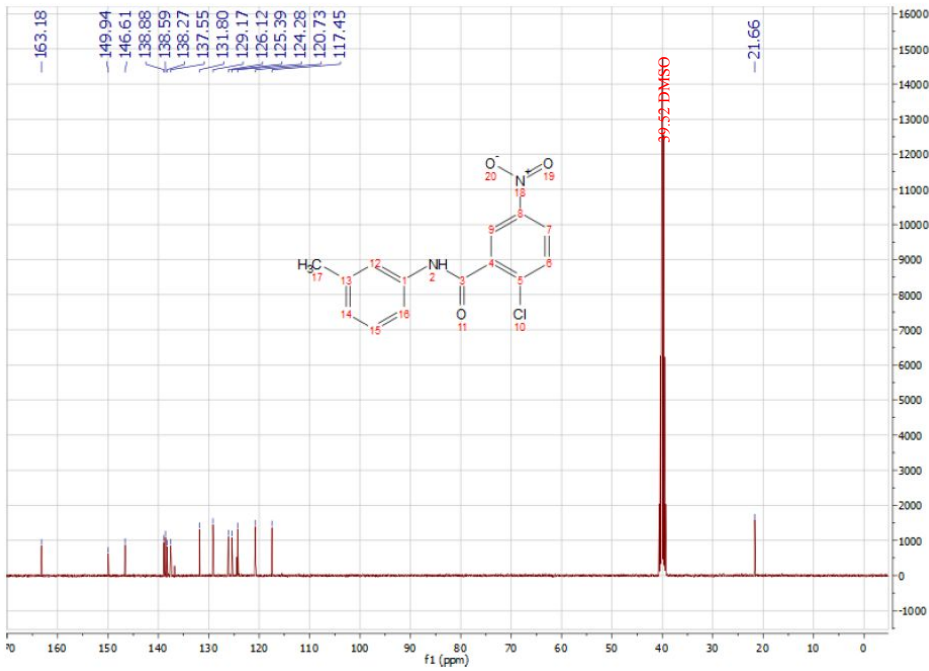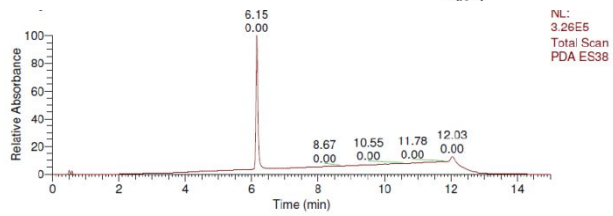

# Compound 9

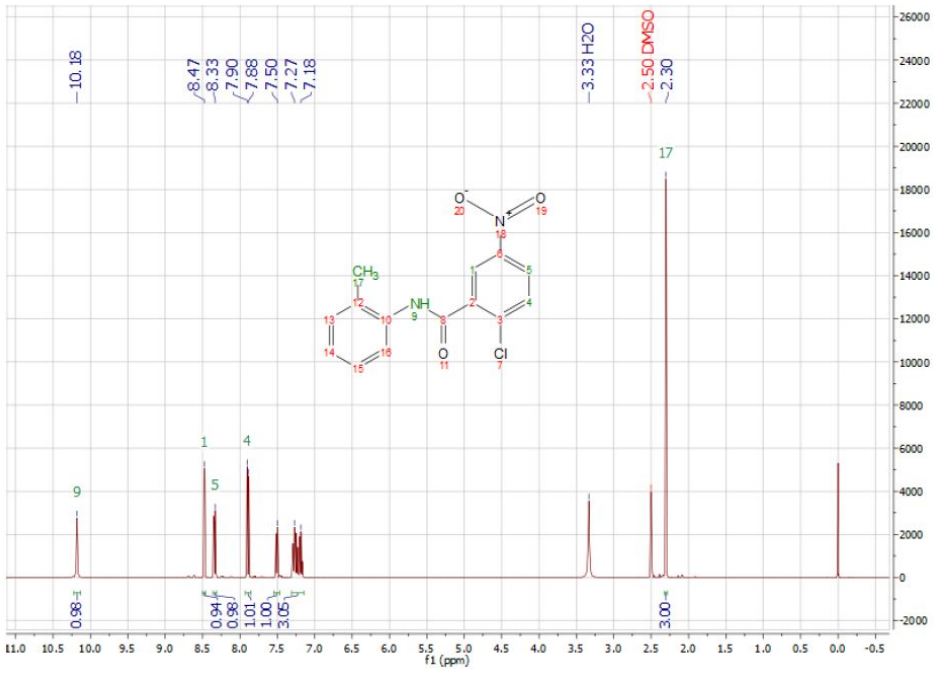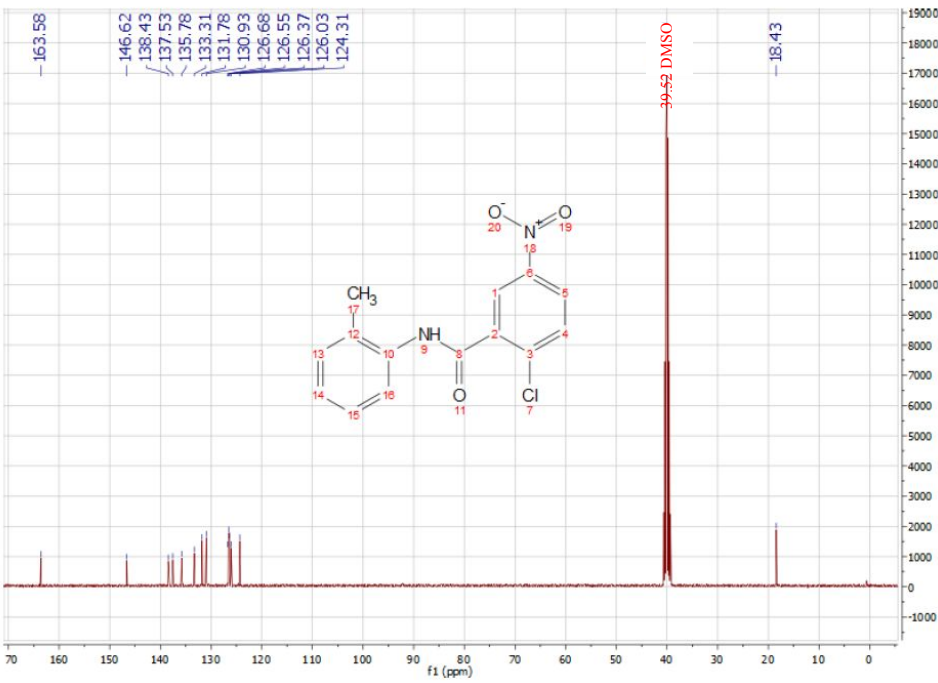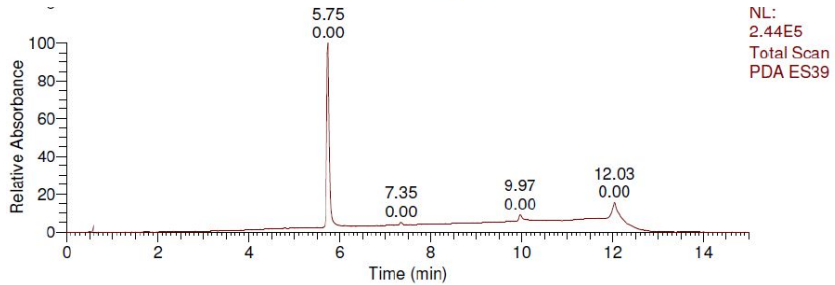

# Compound 10

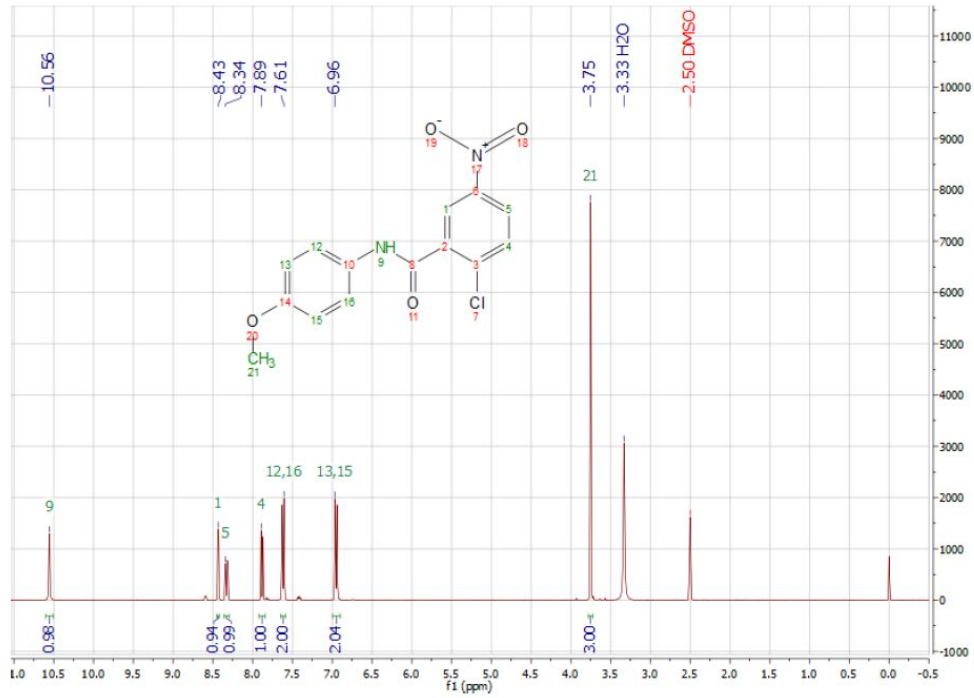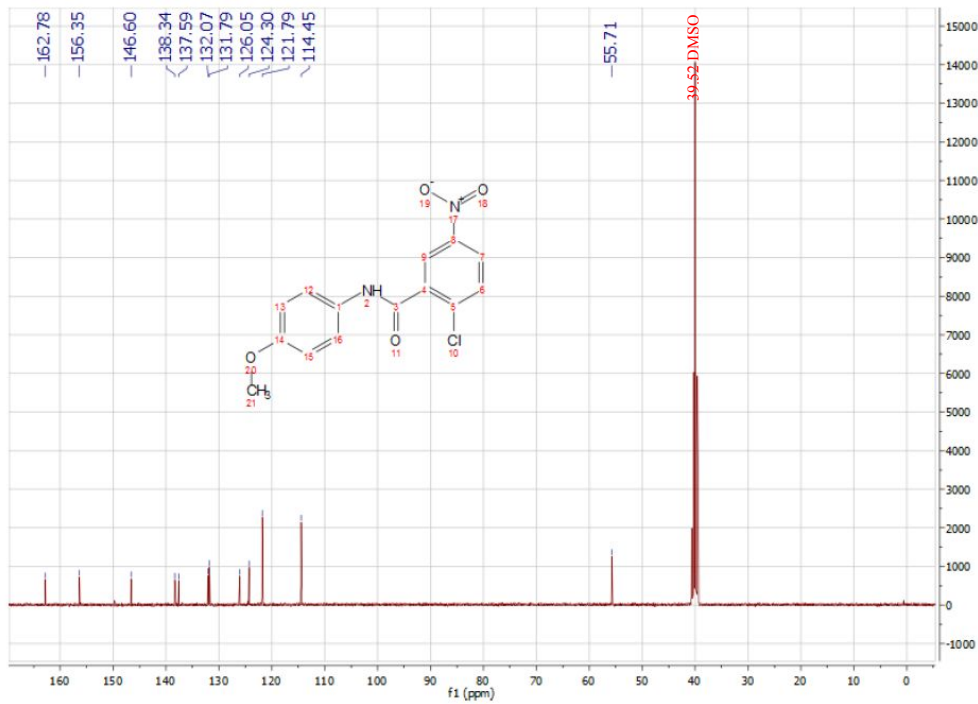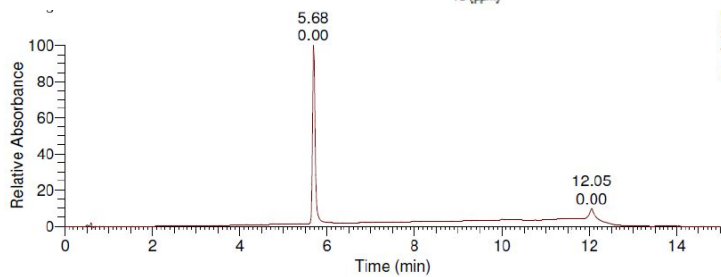



# Compound 11

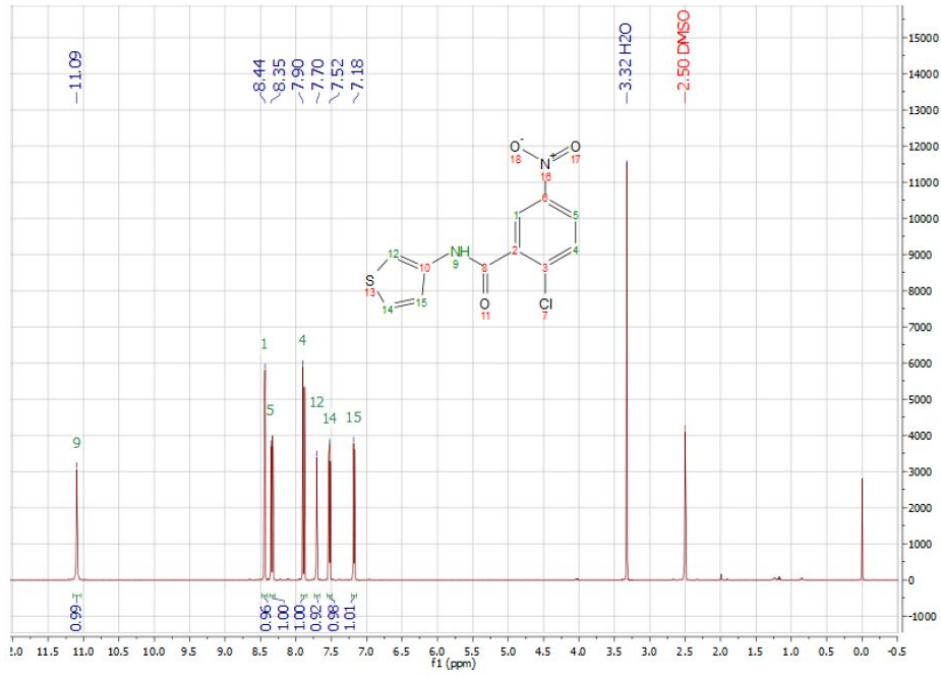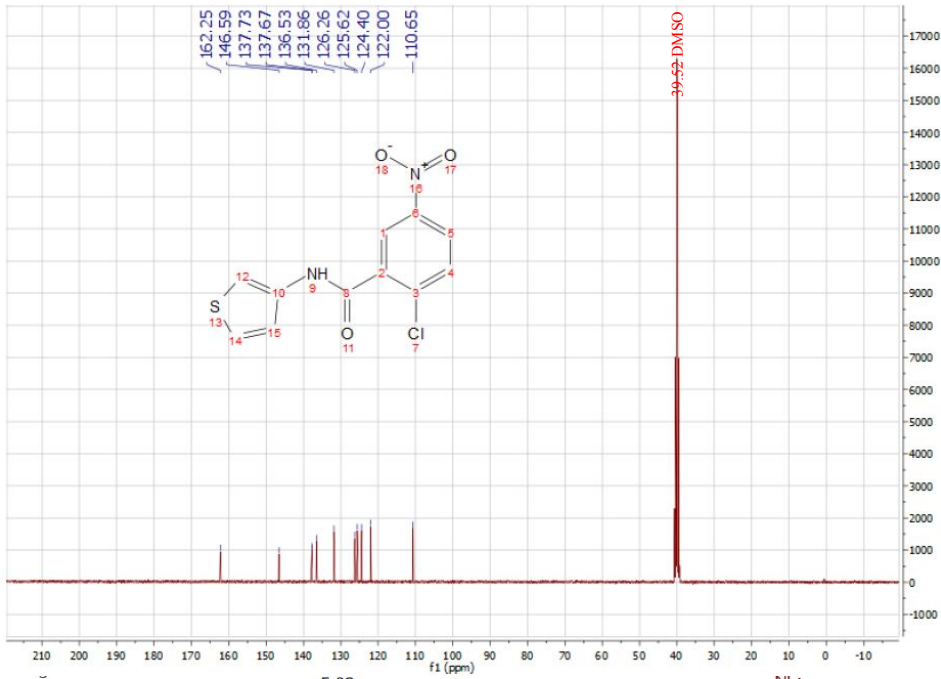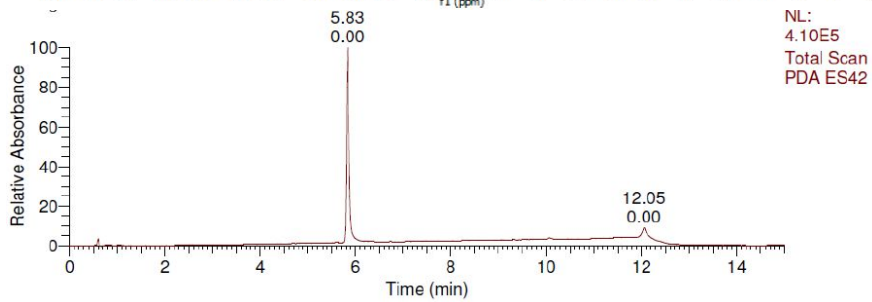

# Compound 12

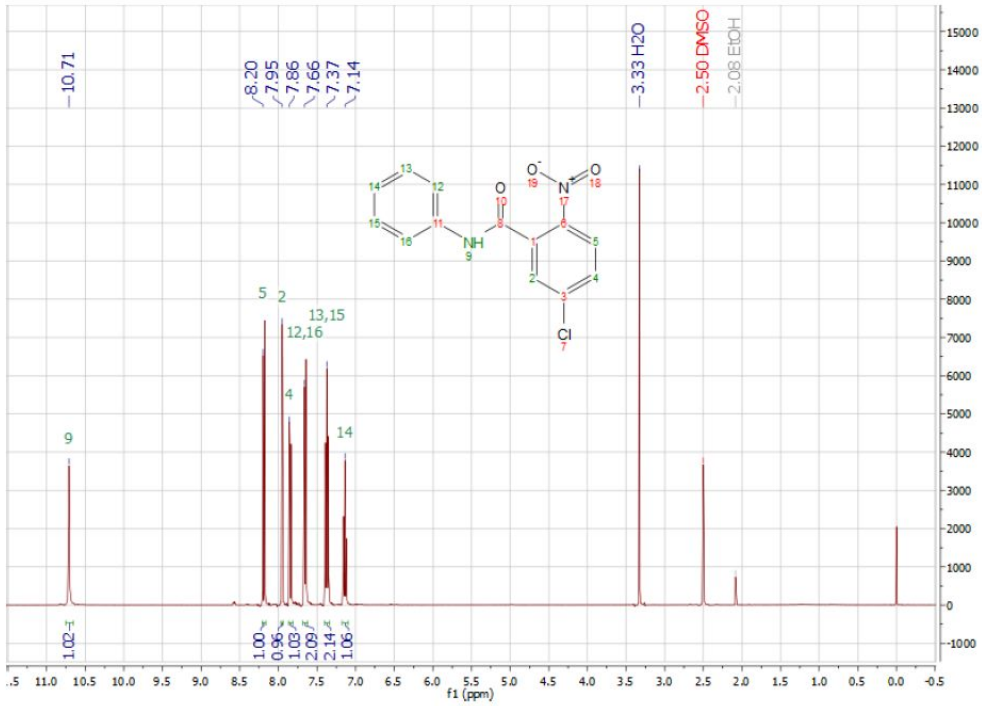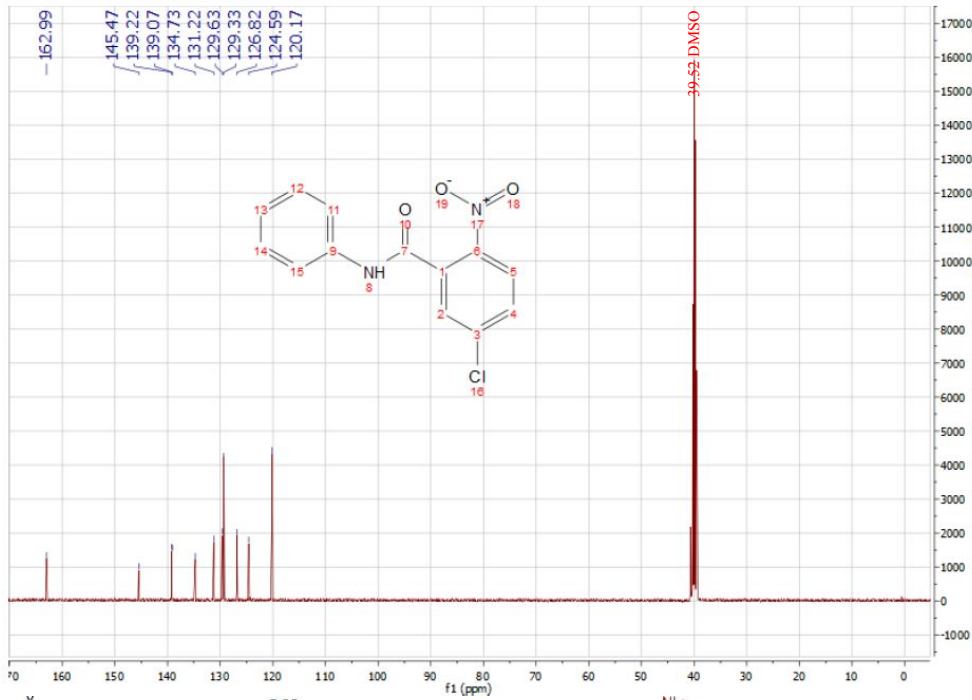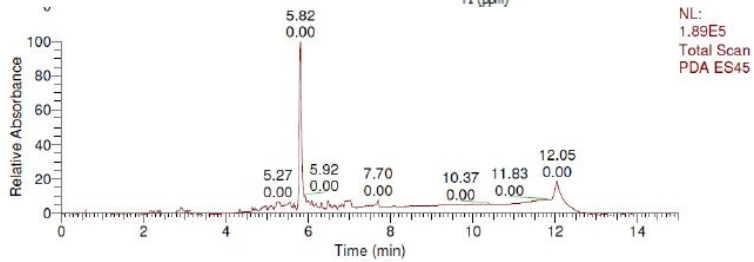

# Compound 13

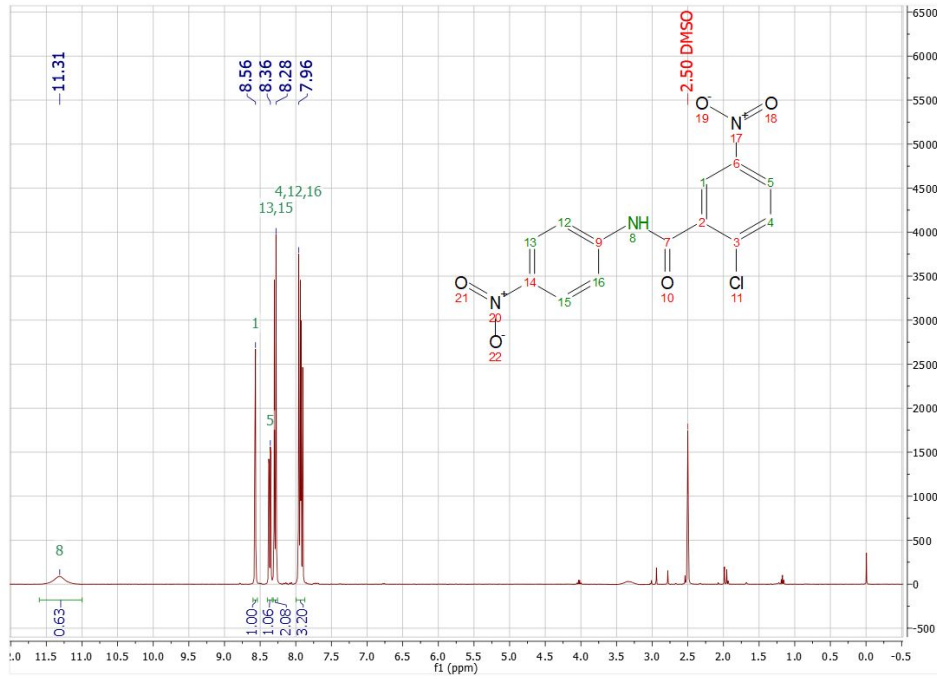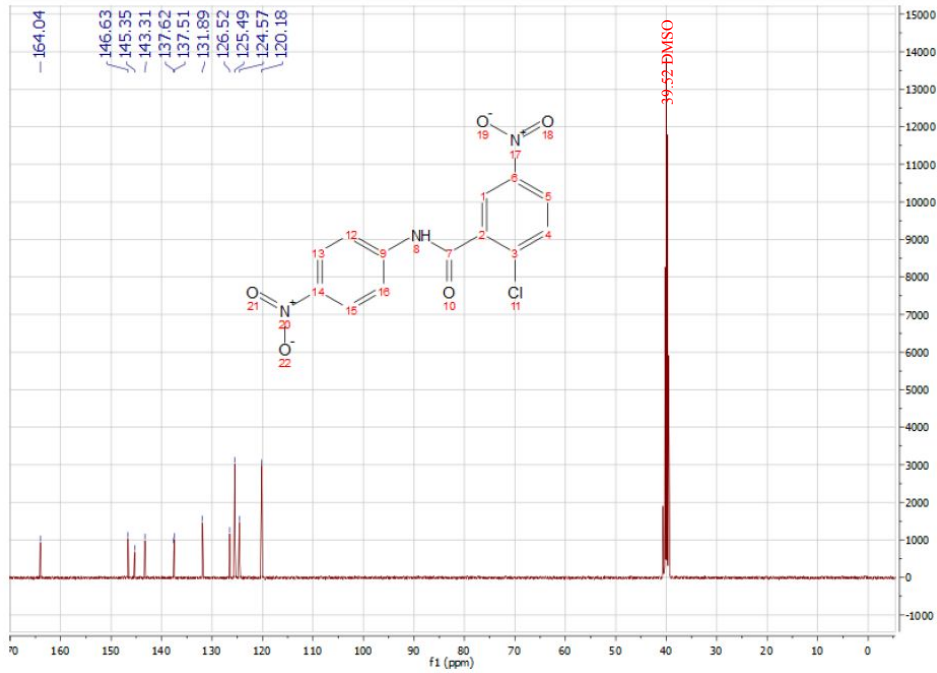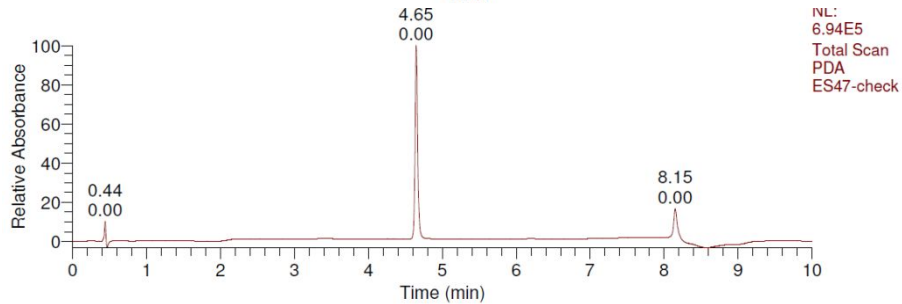

# Compound 14

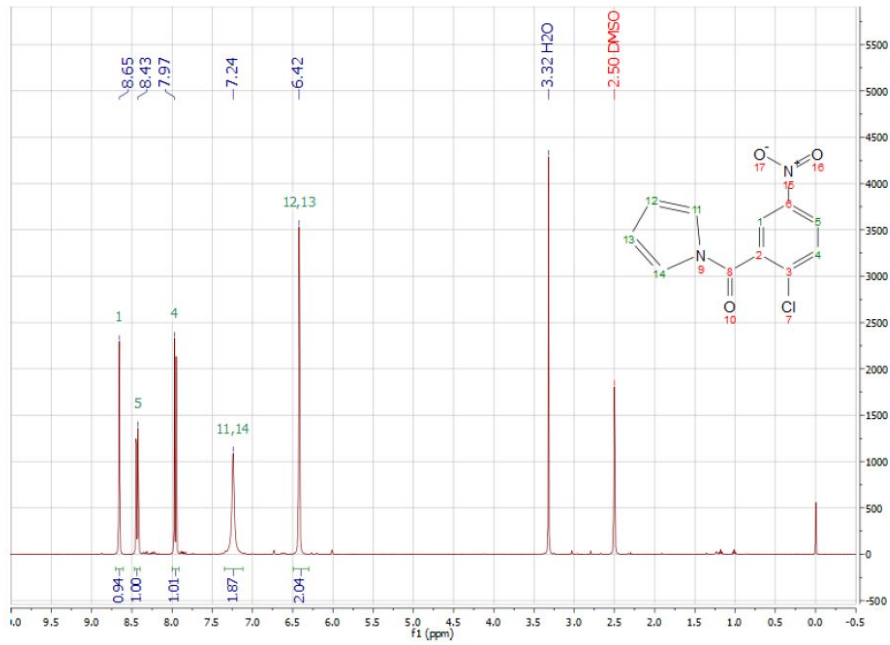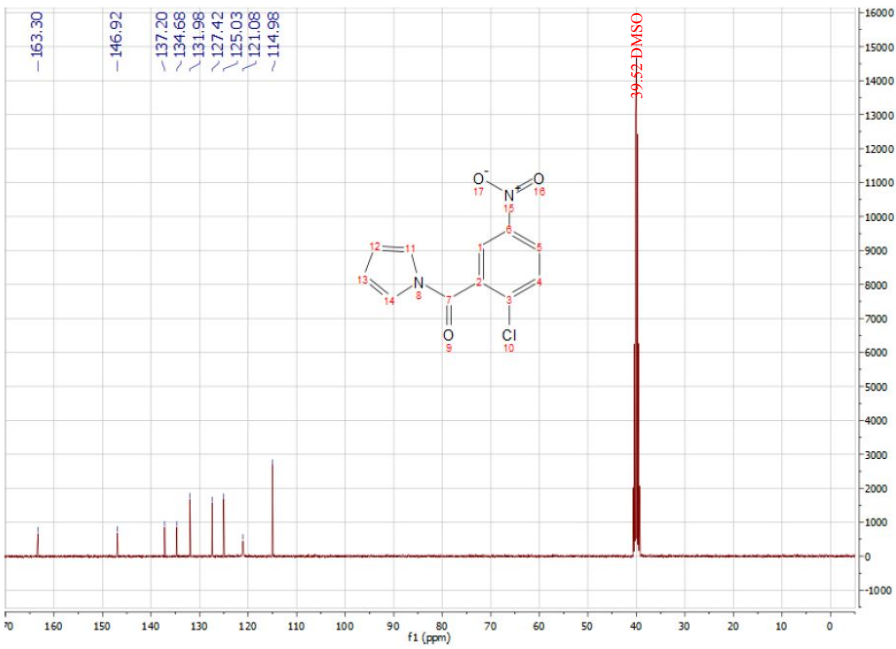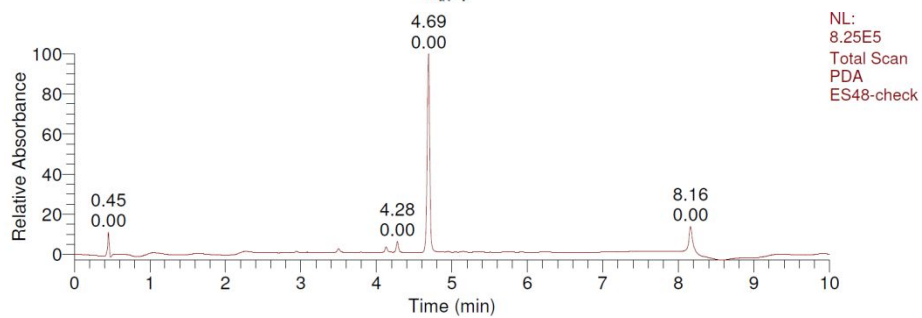

# Compound 15

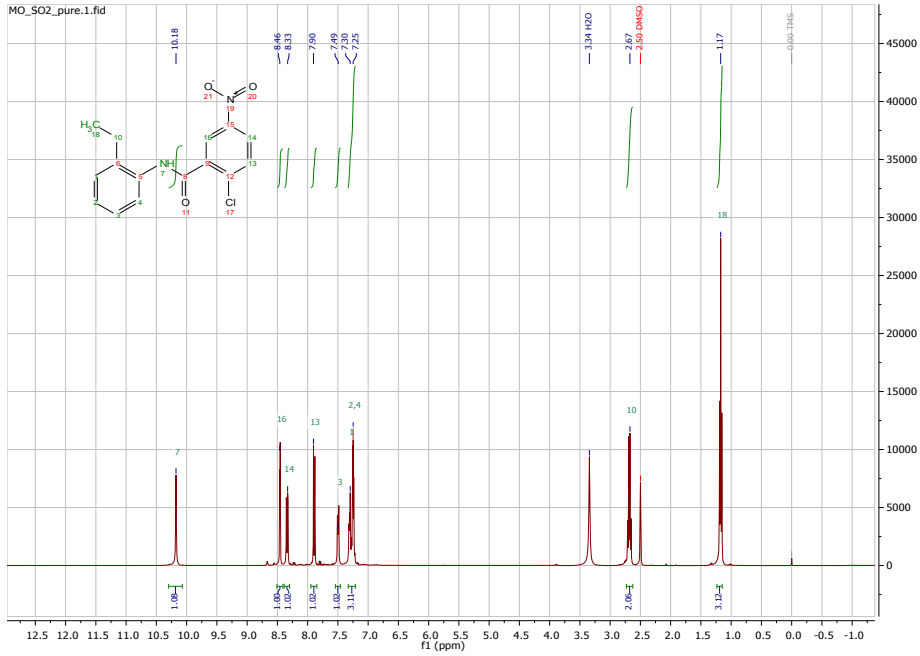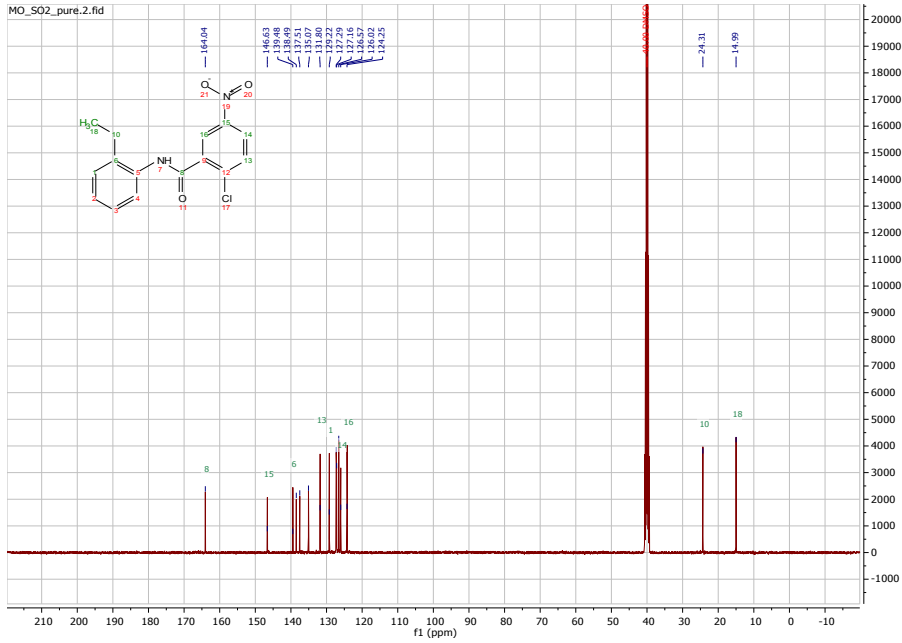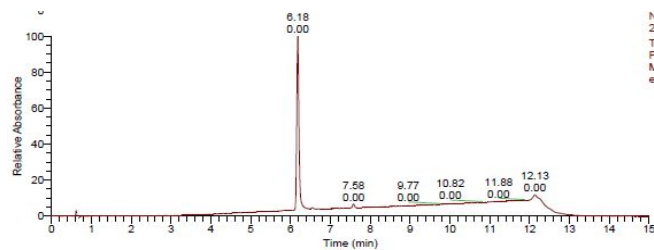

NL:  
2.40E5  
Total Scan  
PDA  
MOS02\_pur  
e

# Compound 16

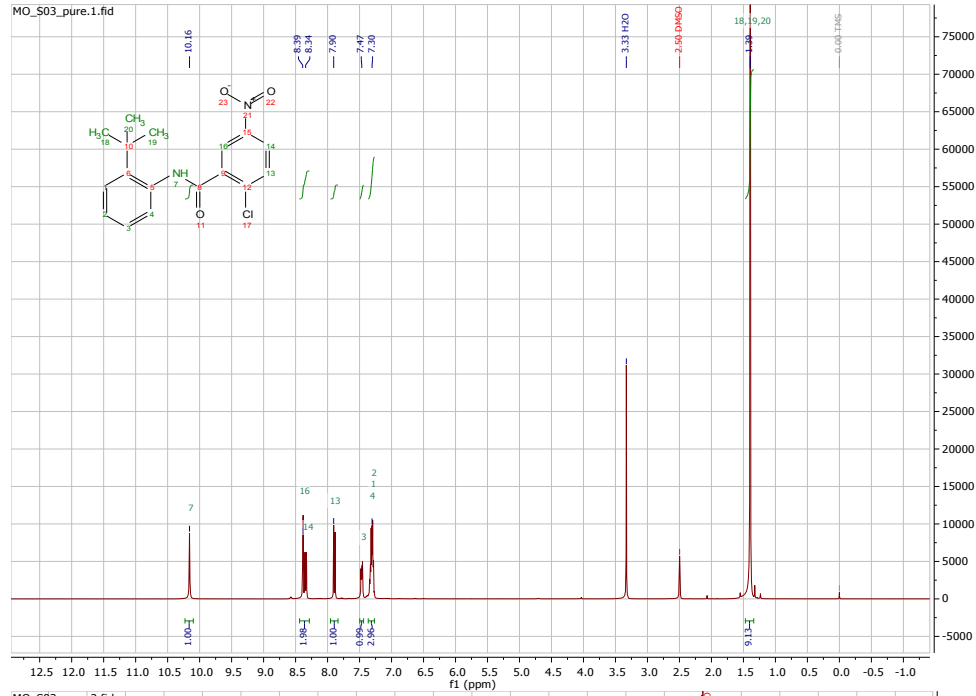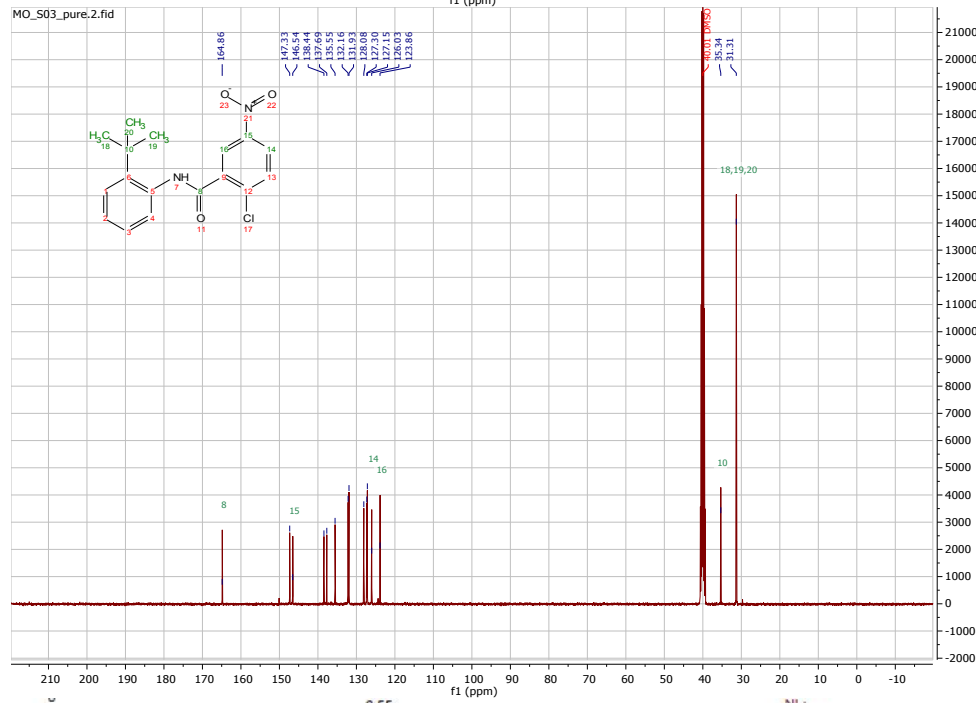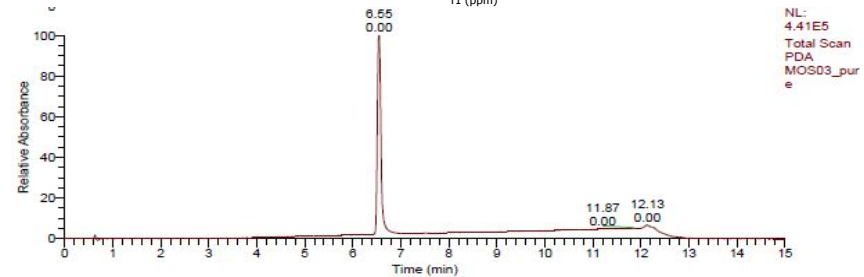

# Compound 17

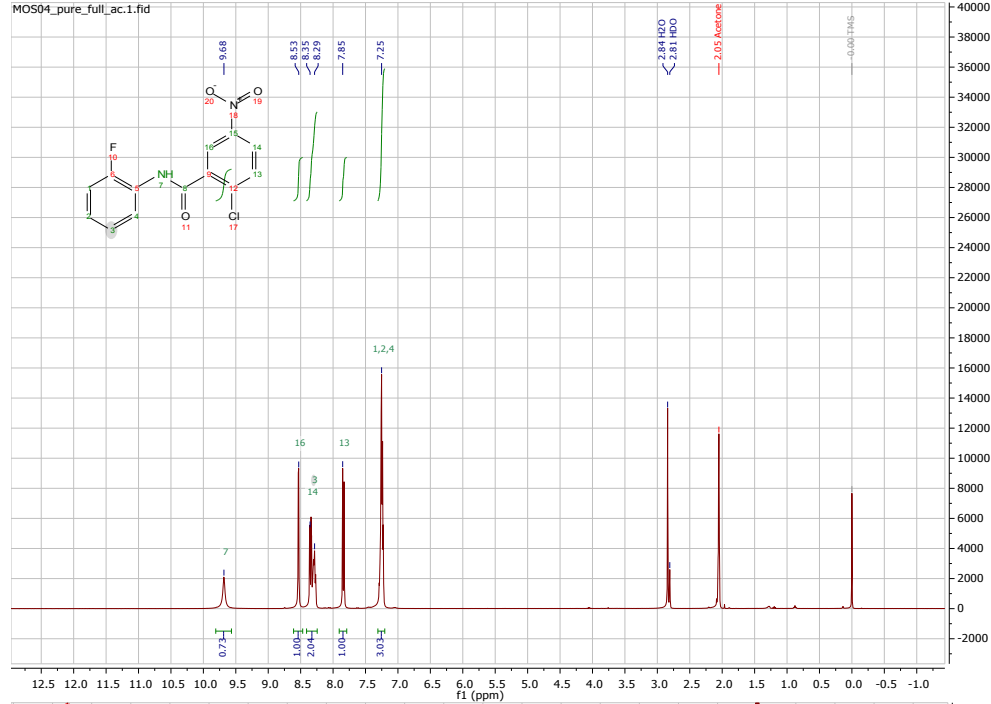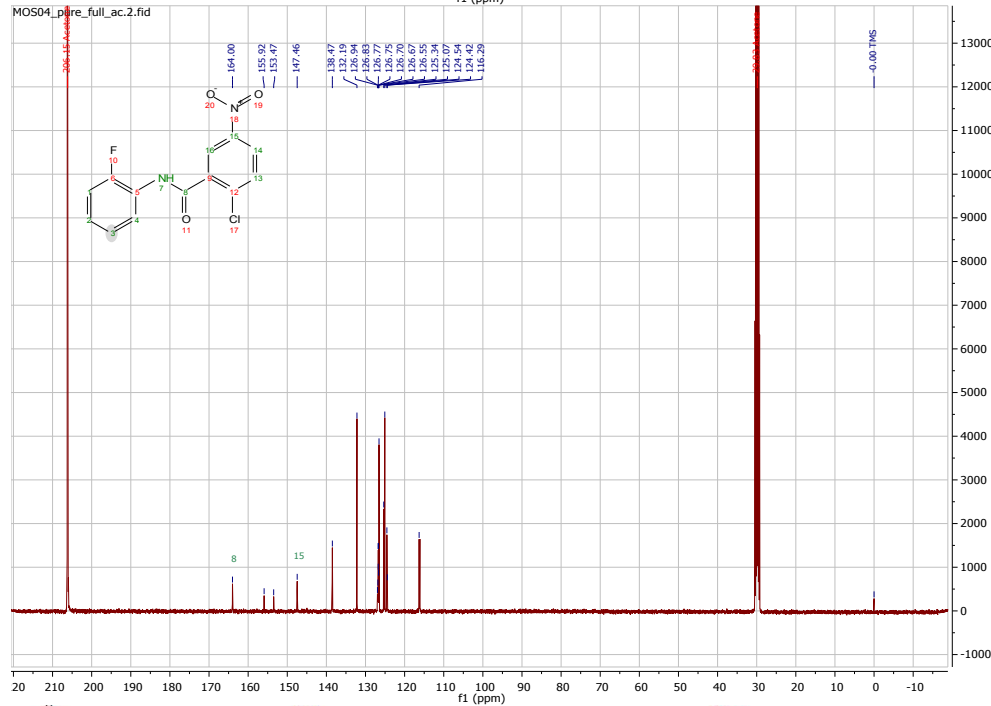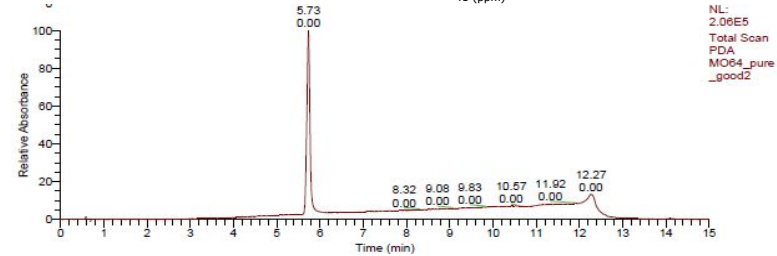

# Compound 18

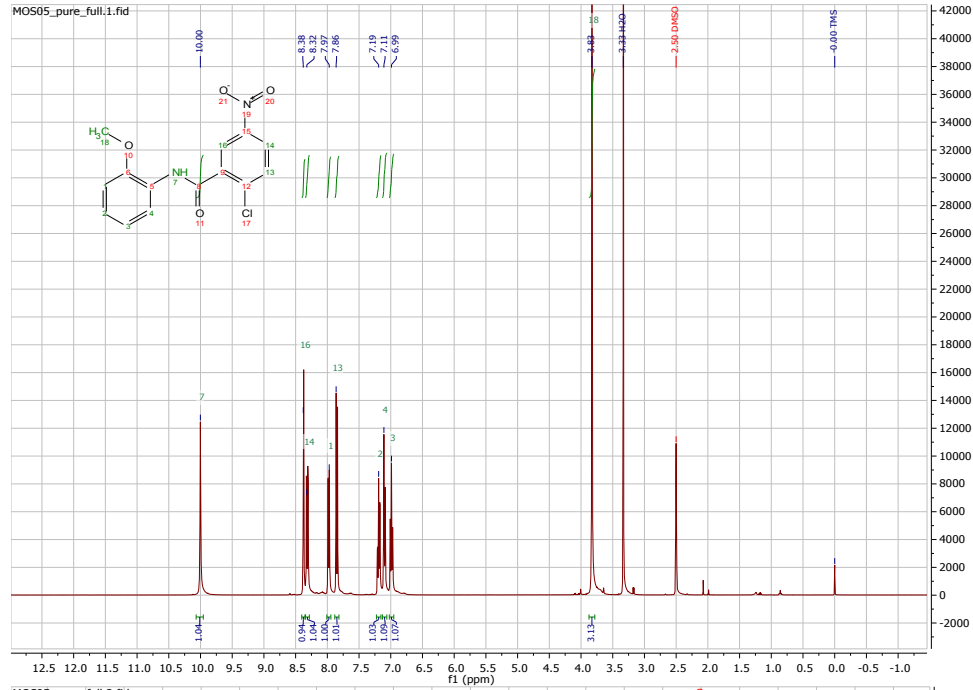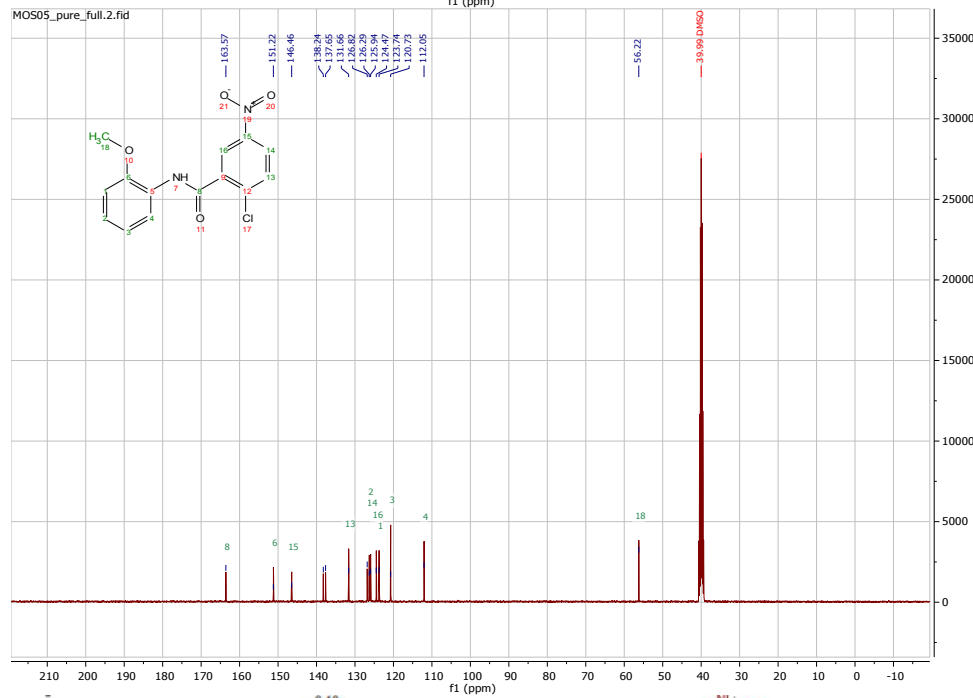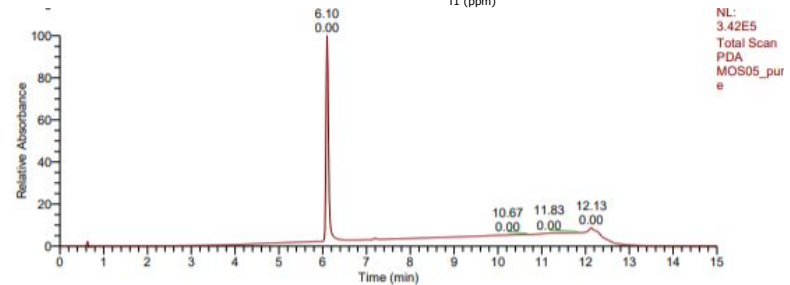

NL:  
3.42E5  
Total Scan  
PDA  
MOS05\_pur  
e



# Compound 19

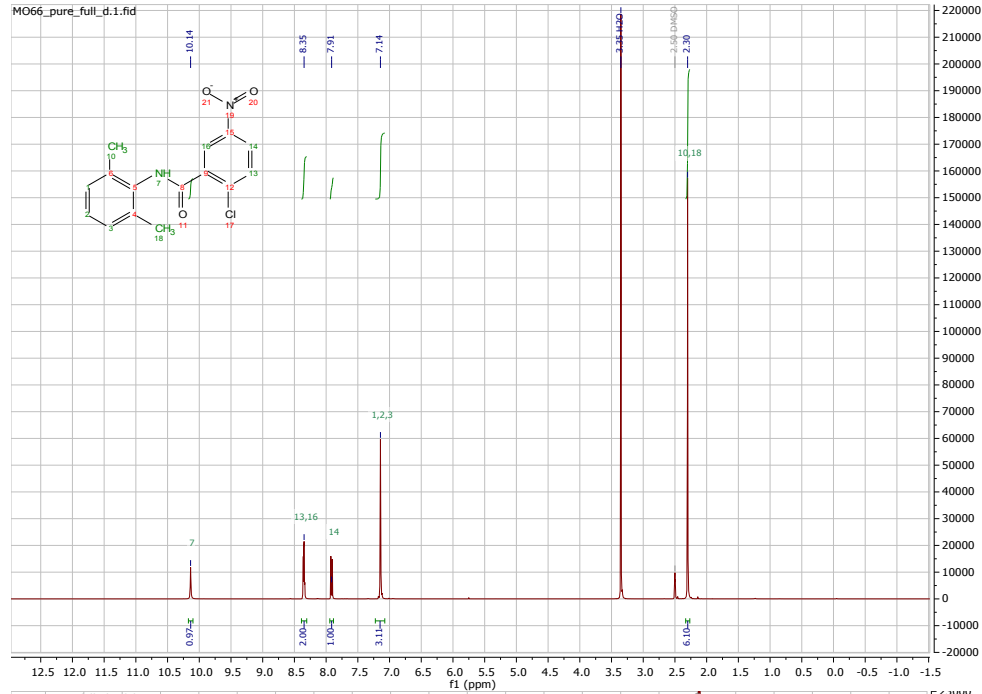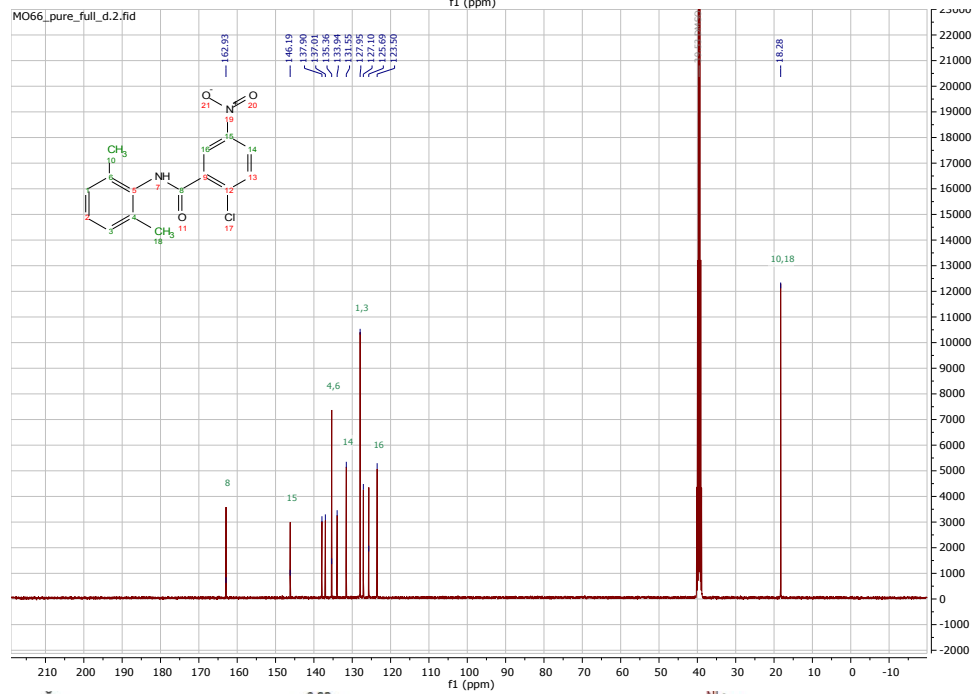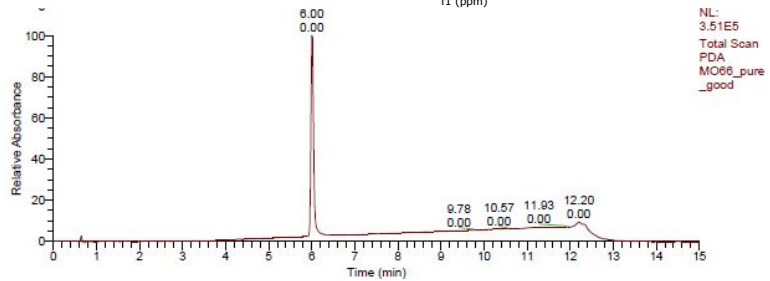

# Compound 20

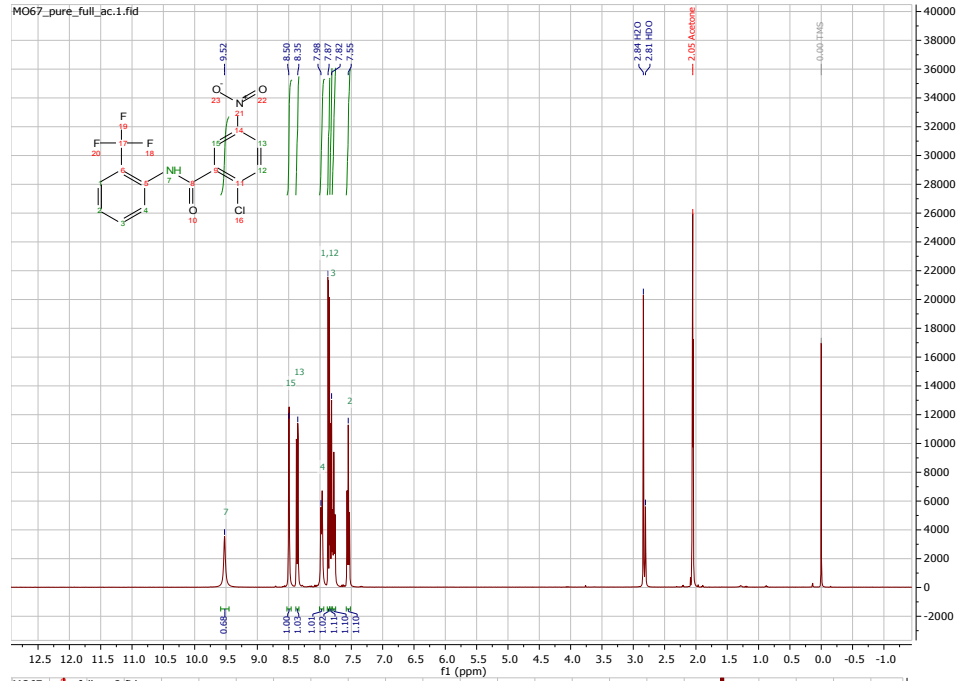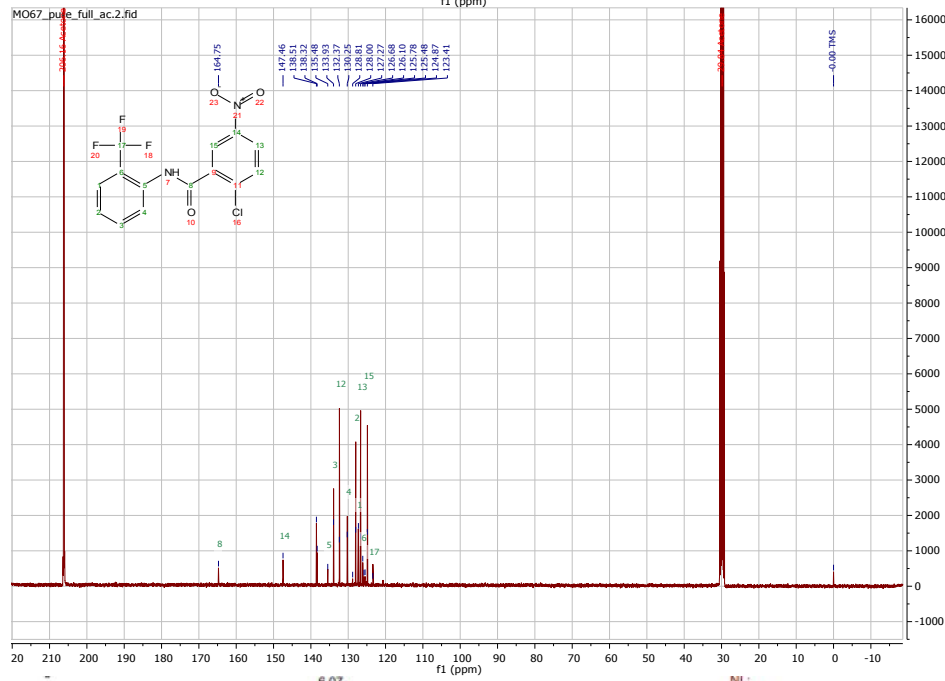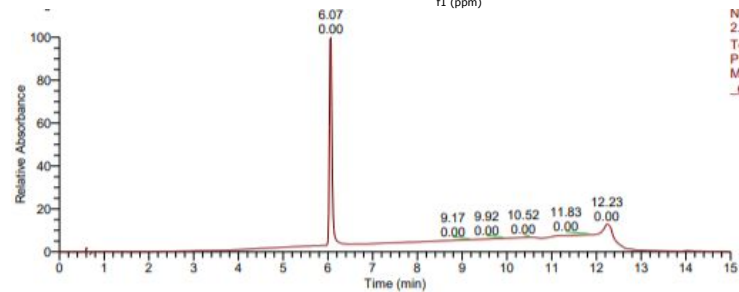

NL:  
2.11E5  
Total Scan  
PDA  
MO67\_pure  
\_good2

# Compound 21

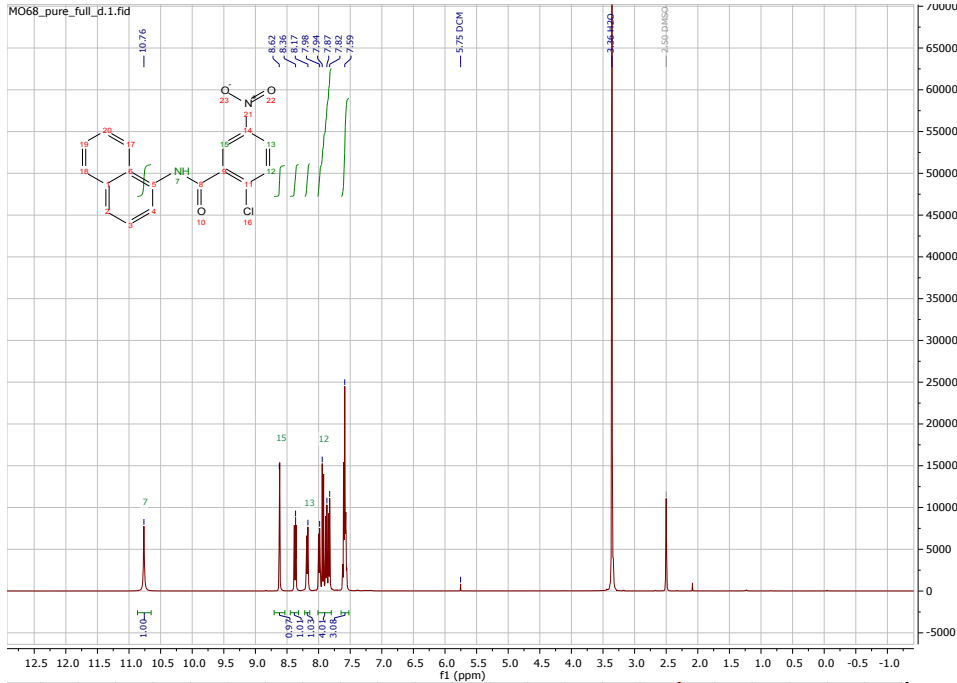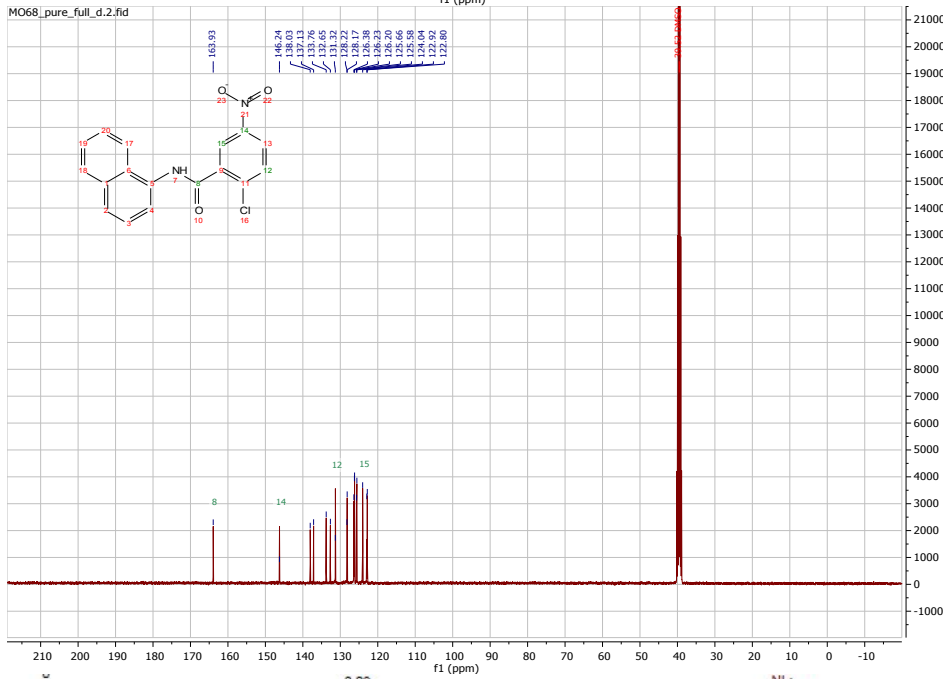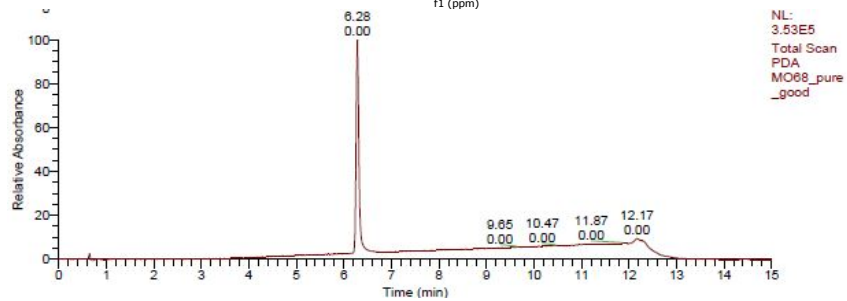

NL-  
3.53E5  
Total Scan  
FDA  
MO68\_pure  
\_good

# Compound 22

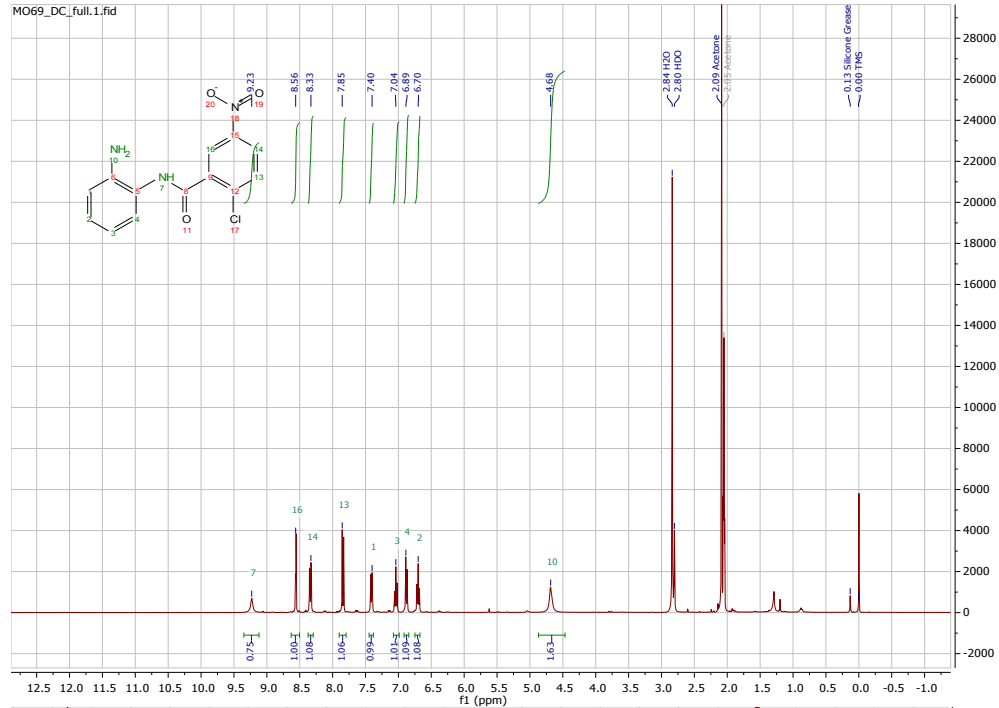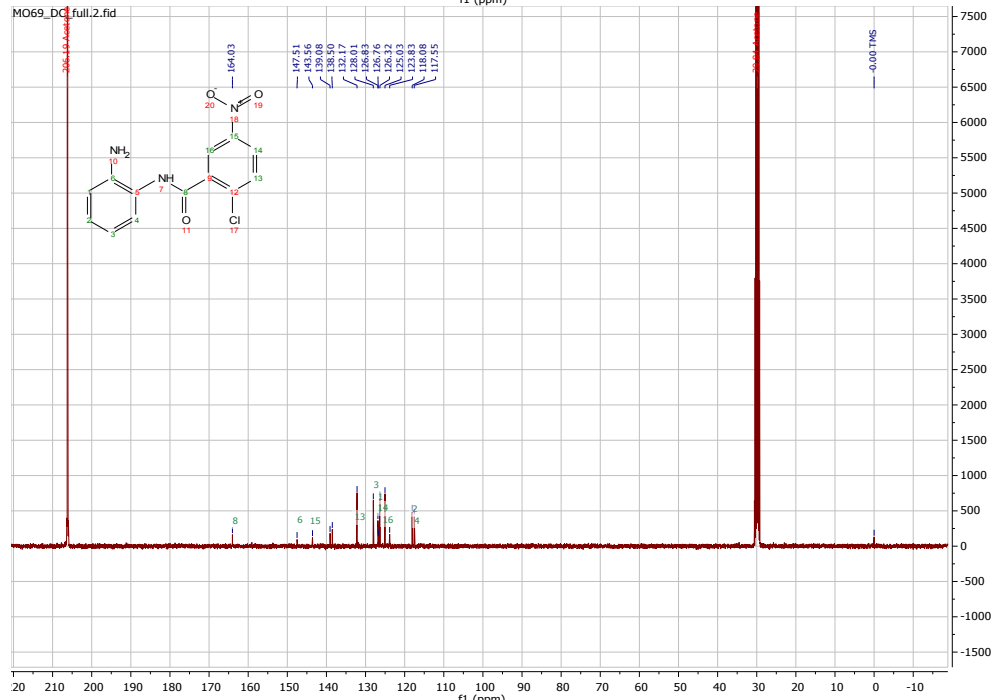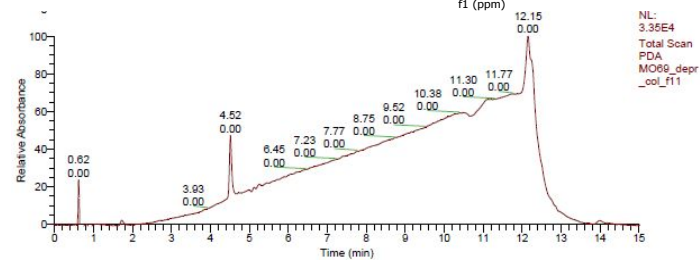

# Compound 23

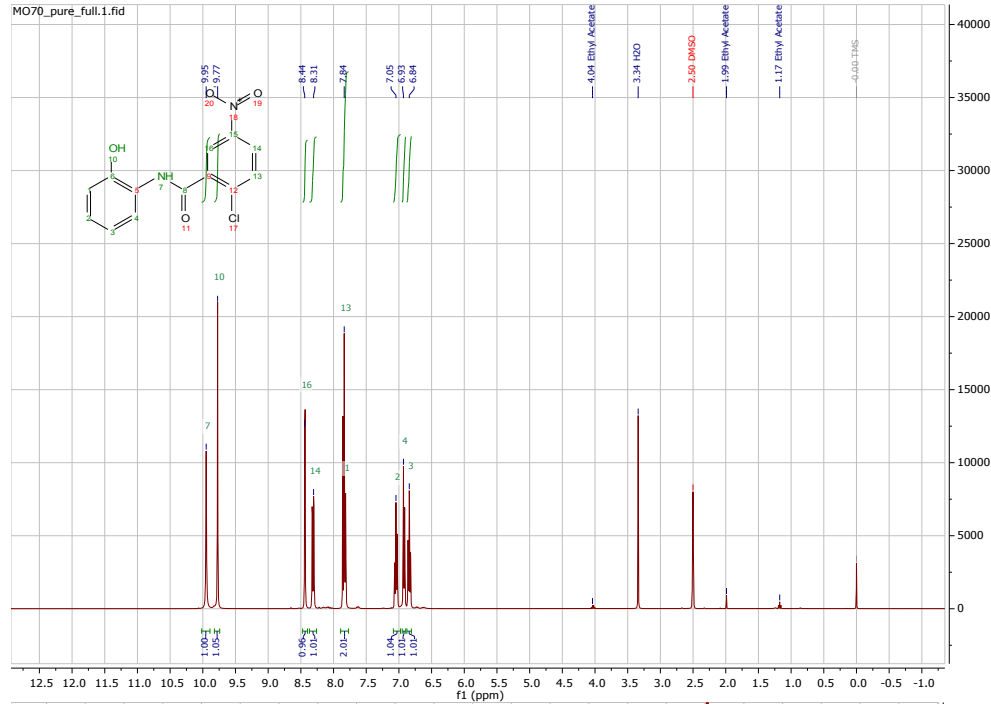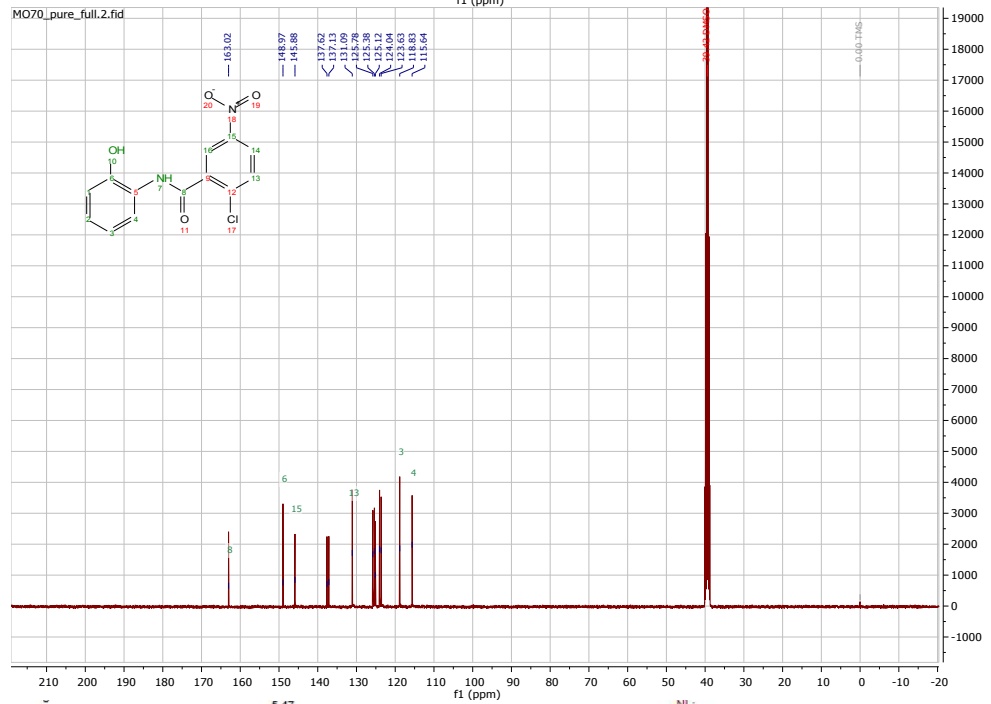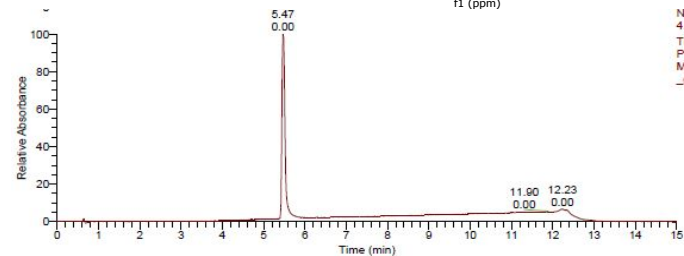

NL:  
4.92E5  
Total Scan  
PDA  
MO70\_pure  
\_good

## REFERENCES

1. Henke, A. & Srogl, J. Thioimides: New Reagents for Effective Synthesis of Thiolesters from Carboxylic Acids. *J. Org. Chem.* **73**, 7783–7784 (2008).
2. Leesnitzer, L. M. *et al.* Functional Consequences of Cysteine Modification in the Ligand Binding Sites of Peroxisome Proliferator Activated Receptors by GW9662. *Biochemistry* **41**, 6640–6650 (2002).
3. Bae, H. *et al.* Mechanistic elucidation guided by covalent inhibitors for the development of anti-diabetic PPAR $\gamma$  ligands. *Chem. Sci.* **7**, 5523–5529 (2016).
4. Amemiya, Y.; Wakabayashi, K.; Takaishi, S.; Fukuda, C. PPARgamma modulators. CA2407587A1 (2001).
5. D'Silva, C. & Iqbal, R. A New Method to N-Arylmethylenepyrroles from N-Acylpyrroles. *Synthesis (Stuttg)*. **1996**, 457–458 (1996).
6. Scheepstra, M. *et al.* Identification of an allosteric binding site for ROR $\gamma$ t inhibition. *Nat. Commun.* **6**, e8833 (2015).
7. Meijer, F. A. *et al.* Ligand-Based Design of Allosteric Retinoic Acid Receptor-Related Orphan Receptor  $\gamma$ t (ROR $\gamma$ t) Inverse Agonists. *J. Med. Chem.* **63**, 241–259 (2020).
8. Agilent Technologies. QuickChange Lightning Site-Directed Mutagenesis Kit. Instruction Manual (Vol. Revision D). (2011).
